# Supplementary material
Source: PubMed Central journal article supplement (PMC2840111)
Supplement: 0911295107_pnas.200911295SI.pdf [file 0911295107_pnas.200911295SI.pdf]

## Supplemental Materials and Methods

All references given correspond to the accompanying publication.

**Bacterial Strain Samples.** The 344 invasive serotype M3 strains (Table S1) that are the basis of this investigation were recovered between January 1992 and December 2007, from a prospective population-based surveillance study of invasive GAS infections conducted in Ontario, Canada (population = 12.2 million in 2006 census). This study has been described in several publications (11-13). The sequence of serotype M3 strain MGAS315, recovered in the late 1980s from a patient with invasive disease, was used as a reference for genome analyses (NCBI ref. seq. NC004070) (14).

**Subclone Assignment.** PCR amplification, gel electrophoresis, and conventional Sanger DNA sequencing was used to determine *emm3* allele, prophage content, and a SNP haplotype, using 15 informative bi-allelic loci distributed around the genome, for all 344 invasive strains. Primers, reagents, and reaction conditions used were as previously described (10). The matrix of these characteristics was used to parse the invasive strains into major subclone lineages providing an initial assessment of the population genetic structure prior to genome sequencing (Fig. 2). Conventional DNA sequencing was performed with fluorescent-terminator chemistry using an Applied Biosystems 3730XL instrument (ABI, Foster City, CA).

**Genome Sequencing and Polymorphism Discovery.** Genome sequence data were generated using the Illumina/Solexa Genome Analyzer System according to the manufacturer's protocols (Illumina, San Diego, CA). Single-end reads were generated for all strains and each strain was sequenced individually in a single flow-cell lane. To avoid sampling bias and assure proportionate representation of each epidemic, we selected every fourth strain in the sequential temporal strain collection dating from January 1992. In the aggregate, 510 million reads constituting 18,360 Mb of high quality sequence data were generated. On average per strain, 5.84 million reads (range: 1.0-to-12.3 x 10<sup>6</sup> reads) or 110 equivalents (range: 18.8-to-232.5 equivalents) of the reference serotype M3 strain MGAS315 genome (1.9 Mbp) were generated. For each strain, ~75% of the reads aligned to the reference sequence providing on average a fairly uniform ~80-fold depth of coverage across the genome. Sequencing reads were mapped and polymorphisms (SNPs and indels) were called relative to the unique portion of the strain MGAS315 reference genome using Variant Ascertainment Algorithm (VAAL) software (16). An inherent limitation of the use of short read length sequence data for polymorphism discovery is that polymorphisms can be accurately identified only relative to regions of unique non-repetitive sequence. Consistent with this only polymorphism identified relative to (that is contained in reads mapping to) the unique endogenous GAS core genome were used herein for genetic analyses. Polymorphisms identified relative to repetitive exogenous sequences, such as prophages, were excluded from the genetic analyses for two reasons: 1<sup>st</sup>) the sequence reads containing them can not be unambiguously uniquely mapped, and 2<sup>nd</sup>) prophages being mobile genetic elements can be transmitted horizontally and therefore polymorphism associated with them may not reflect relationships due to vertical

inheritance. For purposes of analysis and interpretation, we included genome data for eight additional strains from Ontario invasive sample previously obtained by comparative microarray hybridization based sequencing (17). Thus polymorphism discovery and subsequent population genomic analyses are based on genome sequence data for 95 invasive serotype M3 strains from Ontario.

**Mass Spectroscopy SNP Analysis.** One-third ( $n = 280$  of 801, 35%) of the bi-allelic core SNPs identified by full-genome sequencing was analyzed in all 344 invasive *emm3* strains studied and reference strain MGAS315. This random subset of SNP loci was distributed throughout the core genome and reflected the distribution of unique versus informative and coding versus intergenic SNPs of the whole set. Polymorphic loci were assessed by a mass-spectrometry-based method (18, 19) using the iPLEX<sup>®</sup> Gold assay and MassARRAY<sup>®</sup> System according to the manufacturer's instructions (Sequenom, San Diego, CA). Briefly, primers for multiplex PCR amplification, and SNP interrogation by single-base extension reactions were designed using Assay Designer software (Sequenom, Inc.) (Table S8). Templates for extension reactions were amplified by PCR from GAS chromosomal DNA and treated with shrimp alkaline phosphatase. Single-base extension reactions were performed using the extension primers and mass-modified nucleotides at an average multiplex level of 18.1. The resulting extension products were desalted and transferred onto 384 SpectroCHIP<sup>®</sup> solid support (Sequenom, Inc.). Spectra of the extension products were acquired using a MassARRAY Compact Analyzer (Sequenom, Inc.). Genotypes were called (280 loci by 345 strains = 96,600 total calls) using SpectroTYPER V.4 software (Sequenom, Inc.).

**Phylogenetic Reconstruction and Clonal Complex Assignment.** Concatenated SNP and indel loci nucleotide sequences were aligned using ClustalX ([www.clustal.org](http://www.clustal.org)) (24). Phylogenetic relationships based on the aligned sequences were inferred using the Neighbor-Joining method implemented in SplitsTree v.4 ([www.splitstree.org](http://www.splitstree.org)) (25). Schematics of the resultant trees were made using DendroScope (26). Haplotypes were enumerated and genetic distances were calculated using MEGA ([www.megasoftware.net](http://www.megasoftware.net)) (27). Complexes of clonally related strains were systematically inferred by the single-locus-variant-grouping method of eBURST ([eburst.mlst.net](http://eburst.mlst.net)) (20). The concatenated sequence for the 280 core SNP loci (i.e. the SNP genotype for 280 loci = SG<sub>280</sub>) assayed in all 344 of the invasive isolates was parsed into 7 sets each composed of 40 loci, and sequence type numbers were assigned for each of the haplotypes determined for each of the seven concatenated SNP sequences (Fig. S3). This process resulted in a seven-number sequence for each strain, the data format needed by eBURST, analogous to that of standard multilocus sequence typing.

***ropB* Gene Sequencing.** Gene sequencing was done using PCR primers specific for *ropB* (also known as *rgg*), *ropbF*-atcgcatctggctactgacc and *ropbR*-gccctggagctgttgagata. Conventional sequencing was done using an Applied Biosystems 3730XL instrument.

**Statistical Analyses.** As an indice of positive selection, genes having more SNPs than expected for a random distribution were identified by Chi-square test. The expected numbers of SNPs was calculated for all 1549 core genes based on the size of the gene

relative to the core genome, and the total number of SNP loci (Table S6). Probabilities were stringently and liberally corrected for multiple testing, using the Bonferroni, and Benjamini-Hochberg methods, respectively.

As an indice of potential bacterial genetic content influencing clinical disease manifestation, association between strain genotype and infection phenotype was assessed for all 21 of the clonal complexes using Fisher's exact test (Table S7).

As an indice of phylogeographic structure, the correlation between genetic distance based on nucleotide differences and spatial distance based on postal code was assessed among the 95 sequenced strains using the nonparametric two-tailed Spearman's test. Similarly case-to-case geographic distance, intra- and interclonal complex, was assessed using the nonparametric two-tailed Mann-Whitney test. Various other distribution statistics (means, standard deviations, confidence intervals, etc.) were calculated using Prism ([www.graphpad.com](http://www.graphpad.com)).

**Comparative Expression Microarray Analysis.** Global transcriptional analysis was conducted for four strains representative of four phylogenetically divergent *emm3* clones using a custom GeneChip (Affymetrix, Santa Clara, CA) by methods described previously (28). GAS cells were cultured at 37° C in atmosphere supplemented with 5% CO<sub>2</sub> in Todd Hewitt medium with 0.2% w/v yeast extract. Culture growth was assessed by measuring optical density at 600 nm and by quantitative plating CFU enumeration (Fig S5). Bacteria from three replicate cultures were harvested at mid-exponential (OD<sub>600</sub> = 0.45) and stationary (4 hr post OD<sub>600</sub> = 0.45) phases of growth. Bacteria were lysed using the FastPrep system (MP Biomedicals) and RNA was isolated using the RNeasy kit

(QIAGEN, Valencia, CA). DNA was digested by Turbon DNase treatment (Ambion, Austin, TX). RNA concentration and purity was assessed with a 2100 Bioanalyzer (Agilent, Palo Alto, CA). RNA was reverse transcribed and the resultant cDNA was hybridized to microarray chips according to the manufacturer's protocols (Affymetrix). Hybridized chips were scanned, and image files were processed using GCOS software. Genes significantly differently expressed under the conditions compared were determined by ANOVA analysis with probabilities corrected for multiple testing by the method of Bonferroni. Heat maps were generated with CHIPST2C software ([www.chipST2c.org](http://www.chipST2c.org)).

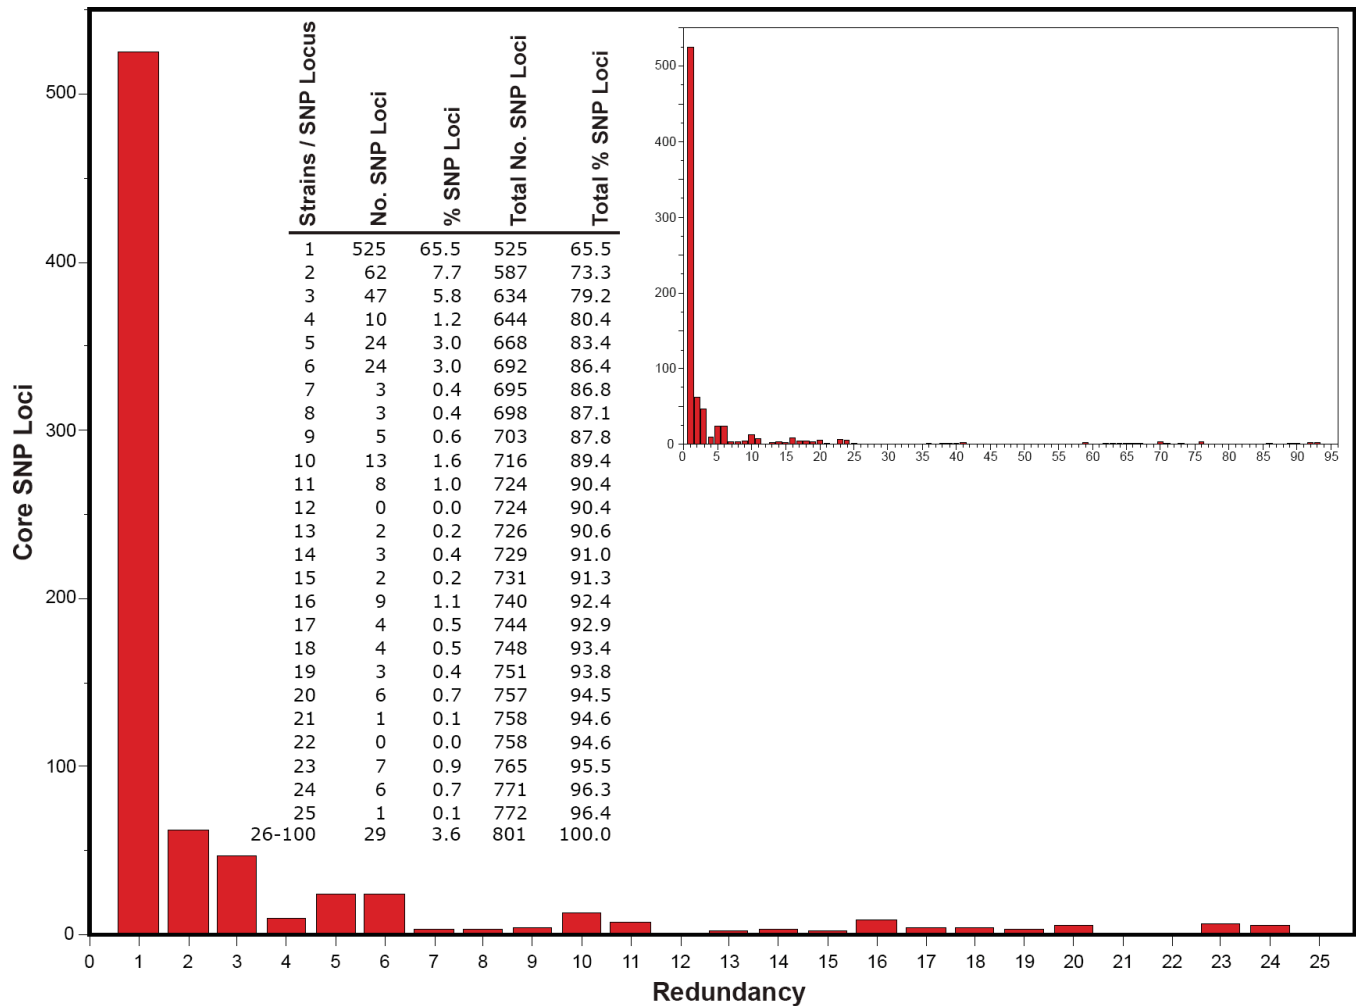

**Fig. S1.** Distribution of SNPs among the 95 sequenced serotype M3 genomes. As a population 65% of SNP loci (525/801) and 10% of the SNPs (525/5243) are strain specific. The vast majority of SNP loci are present in only one or just a few strains. Individually each strain has on average ~6 unique SNPs (range 0 to 47 SNPs), and ~41 informative SNPs (range 10 to 70 SNPs) in the core genome relative to the others. Inset graph shows the complete histogram of SNP loci among the 95 sequenced strains. Inset table lists the SNP loci distribution.

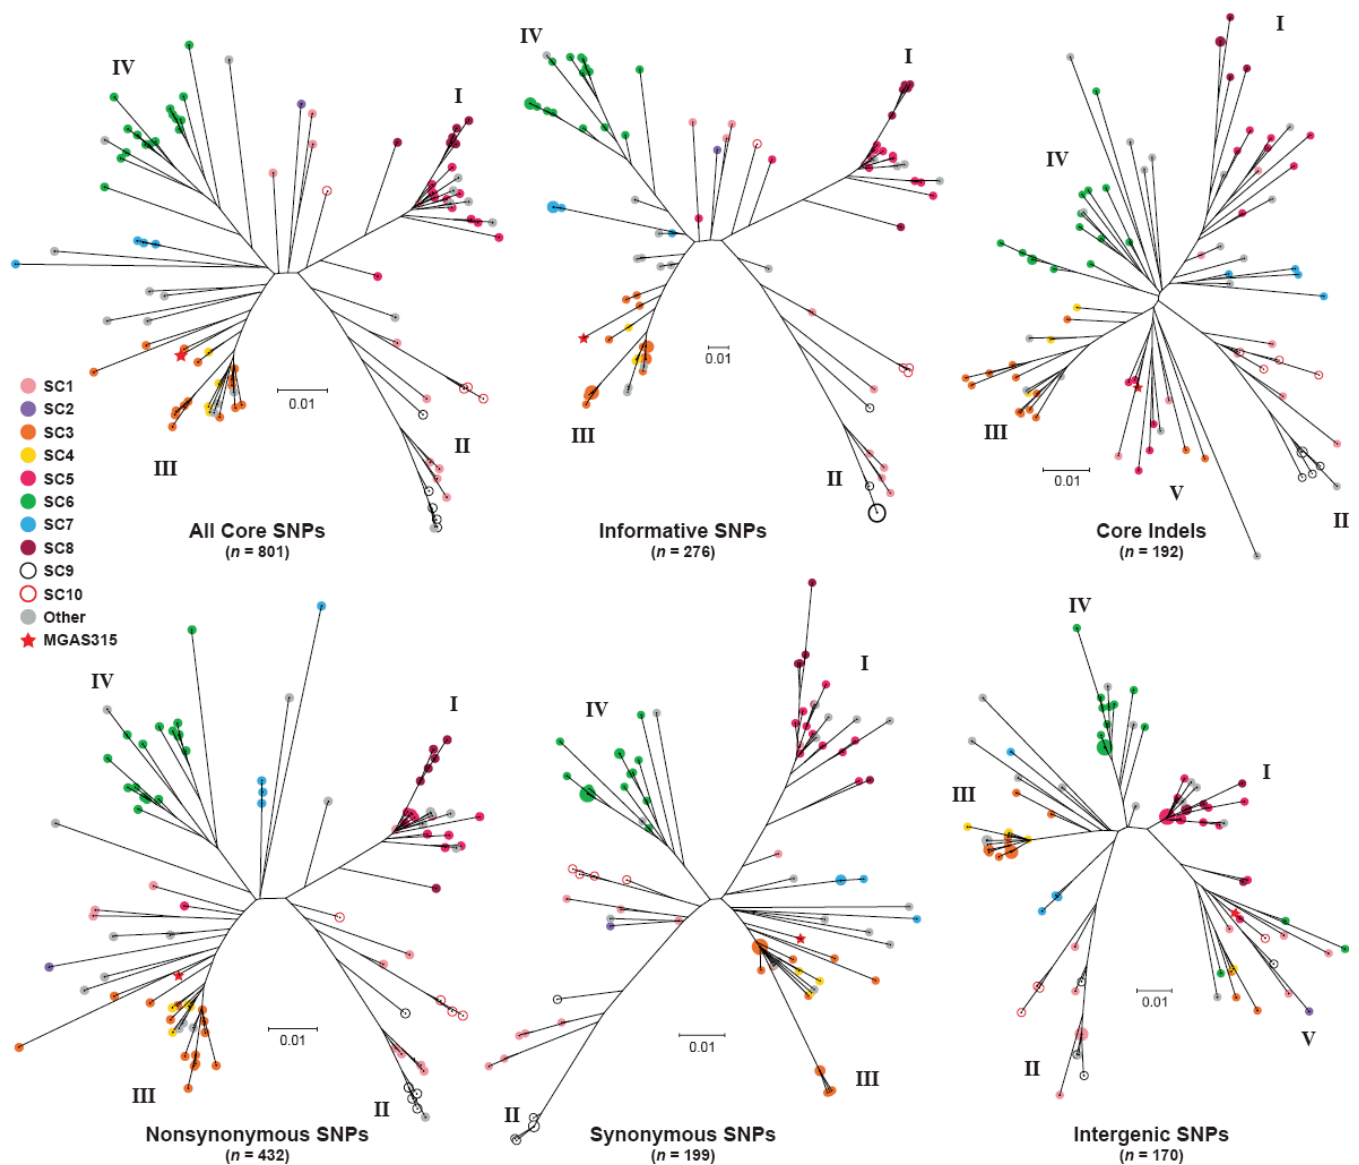

**Fig. S2.** Relationships among serotype M3 strains. Shown for the sequenced strains are unrooted neighbor-joining trees generated using different subsets of the core polymorphisms as indicated. Nodes of the trees are color coded by subclone as shown in the legend. Each tree has a topology with four major branches, a SC5-SC8 branch (I), a SC1-SC9-SC10 branch (II), a SC3-SC4 branch (III), and a SC6 branch (IV). In addition to these four branches, the trees based on intergenic SNPs and indels have a fifth branch (V) that is composed of a mixture of strains coming from the other four main branches. The intermixed composition of the fifth branch is consistent with a subset of the intergenic SNPs and indels being in linkage equilibrium relative to the other polymorphisms. This may indicate convergence for some intergenic/noncoding sequence polymorphisms, and in the case of indels relative to SNPs, might also reflect a different underlying mutational process at work, such as slip-strand mispairing.



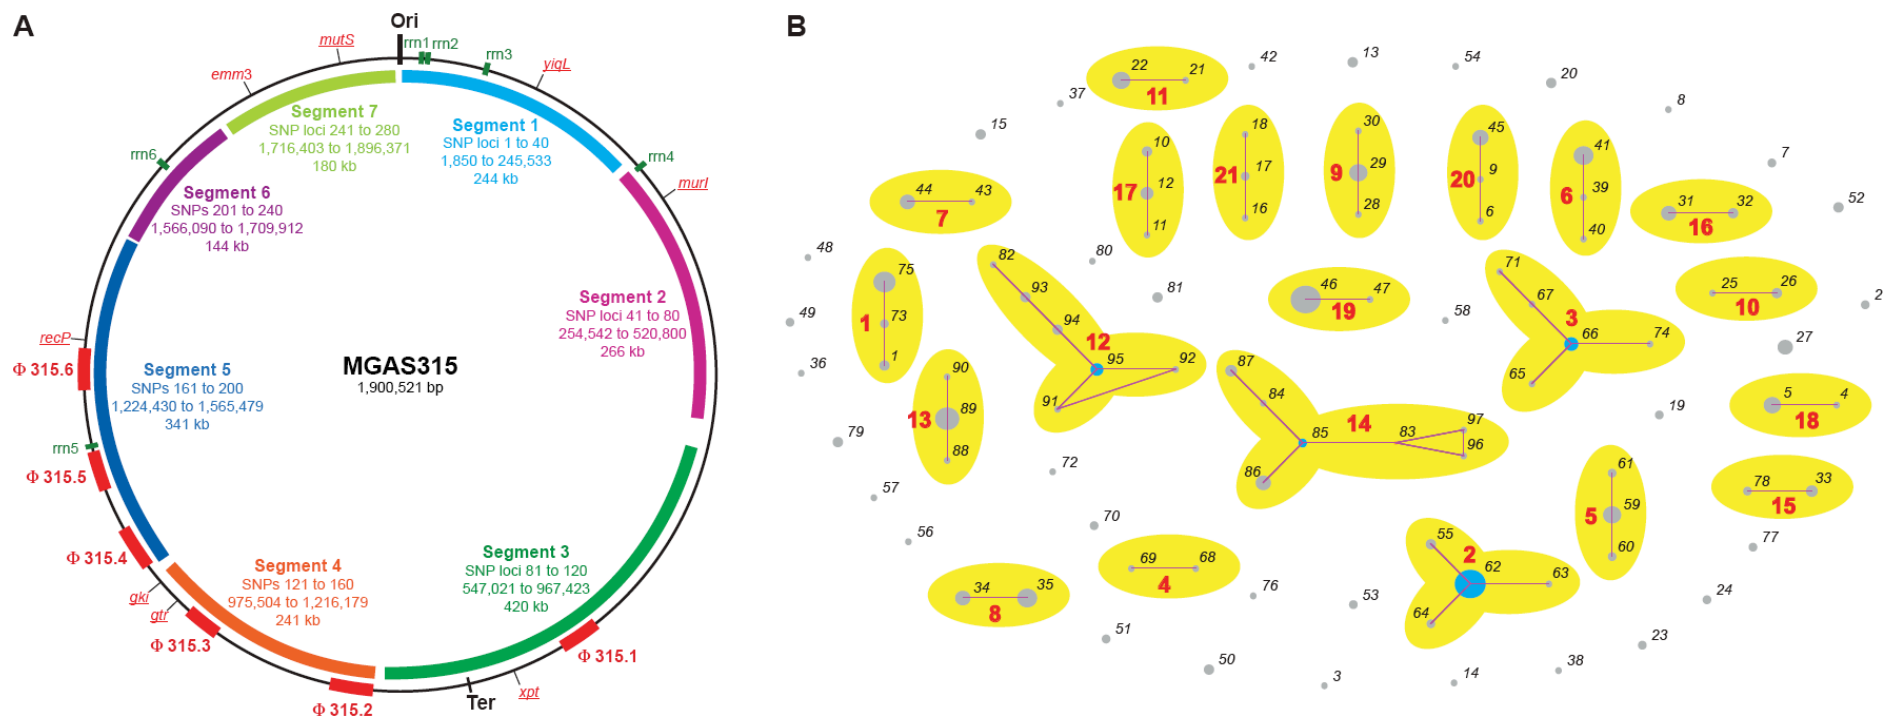

**Fig S3.** Systematic assignment of strains into predicted complexes of clonally related haplotypes. **(A)** Illustrated is the portion of the MGAS315 core genome interrogated by parsing the 280 sequence-validated SNPs into seven equal sets of 40 consecutive SNPs each. This parsing was conducted for all 344 of the epidemic isolates to generate a seven number sequence type analogous to that of standard GAS MLST. In eBURST MLST parlance, allelic profiles were determined for each of the 40 SNP segments and then the allele numbers for the segments of each strain were combined to produce a seven number sequence type. In comparison the portions of the genome interrogated by the seven housekeeping genes used for standard GAS MLST are shown in red and underlined. Given as landmarks on the genome, are the six ribosomal RNA operons (*rrn1-6*) and the six prophages ( $\phi 315.1-6$ ). **(B)** Shown schematically for the 344 epidemic isolates and MGAS315 are the 97 haplotypes defined by the 280 sequence-validated SNPs. Haplotypes are illustrated as circles that are proportional in size to the number of strains represented. Shown in yellow are the 21 clonal complexes of closely related haplotypes determined by the single locus variant grouping method of eBURST. Lines link related haplotypes, and primary founder haplotypes of the complexes are shown in blue if a founder was predicted. Strains encompassed by the 21 clonal complexes account for 80% (275/344) of the invasive isolate study set.

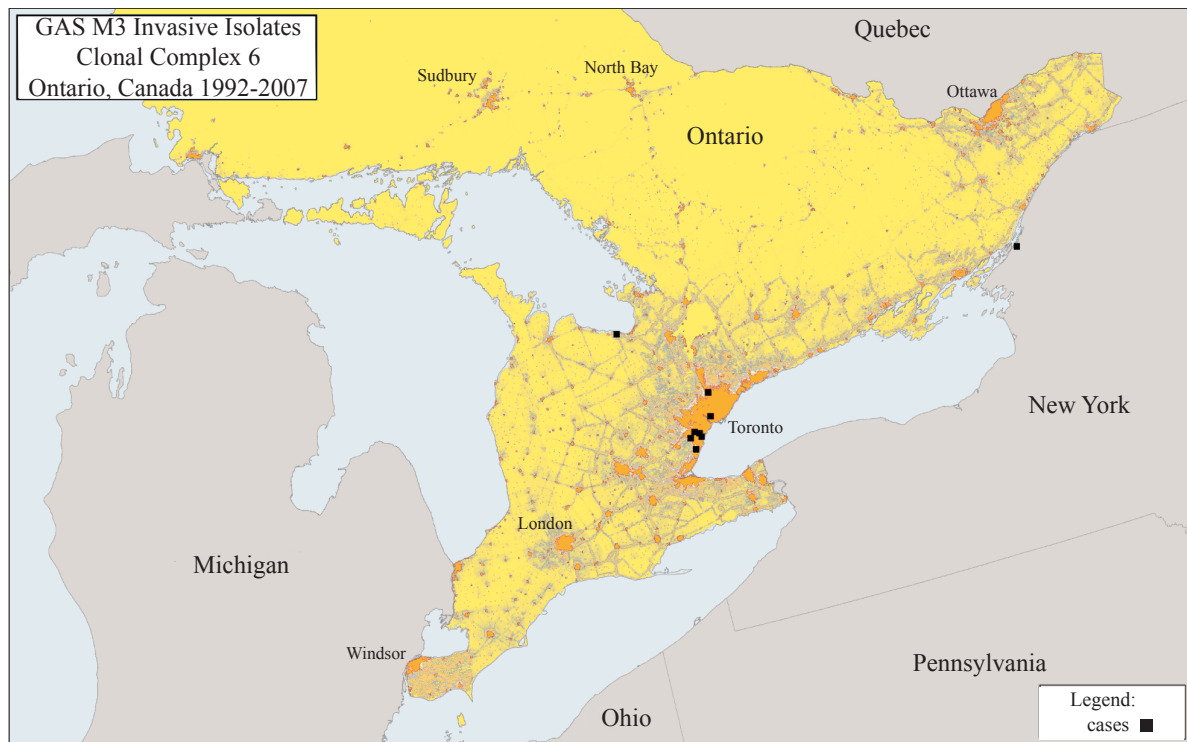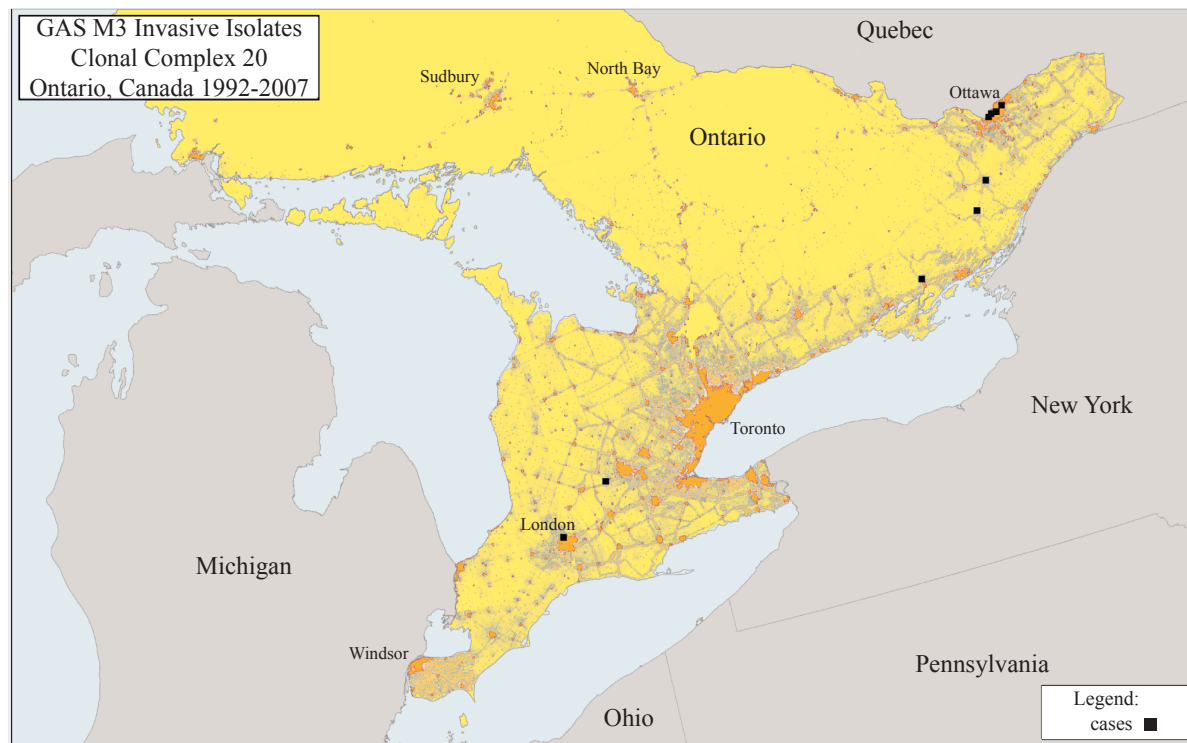

**Fig. S4.** Geographic distributions for strains of two of the 21 clonal complexes. Population density is shown in a gradient from yellow/low to orange/high. Most of the CC6 strains (top panel) are clustered in the Toronto, Ontario area. In contrast many of the CC20 strains (bottom panel) are clustered in Ottawa but none are in Toronto.

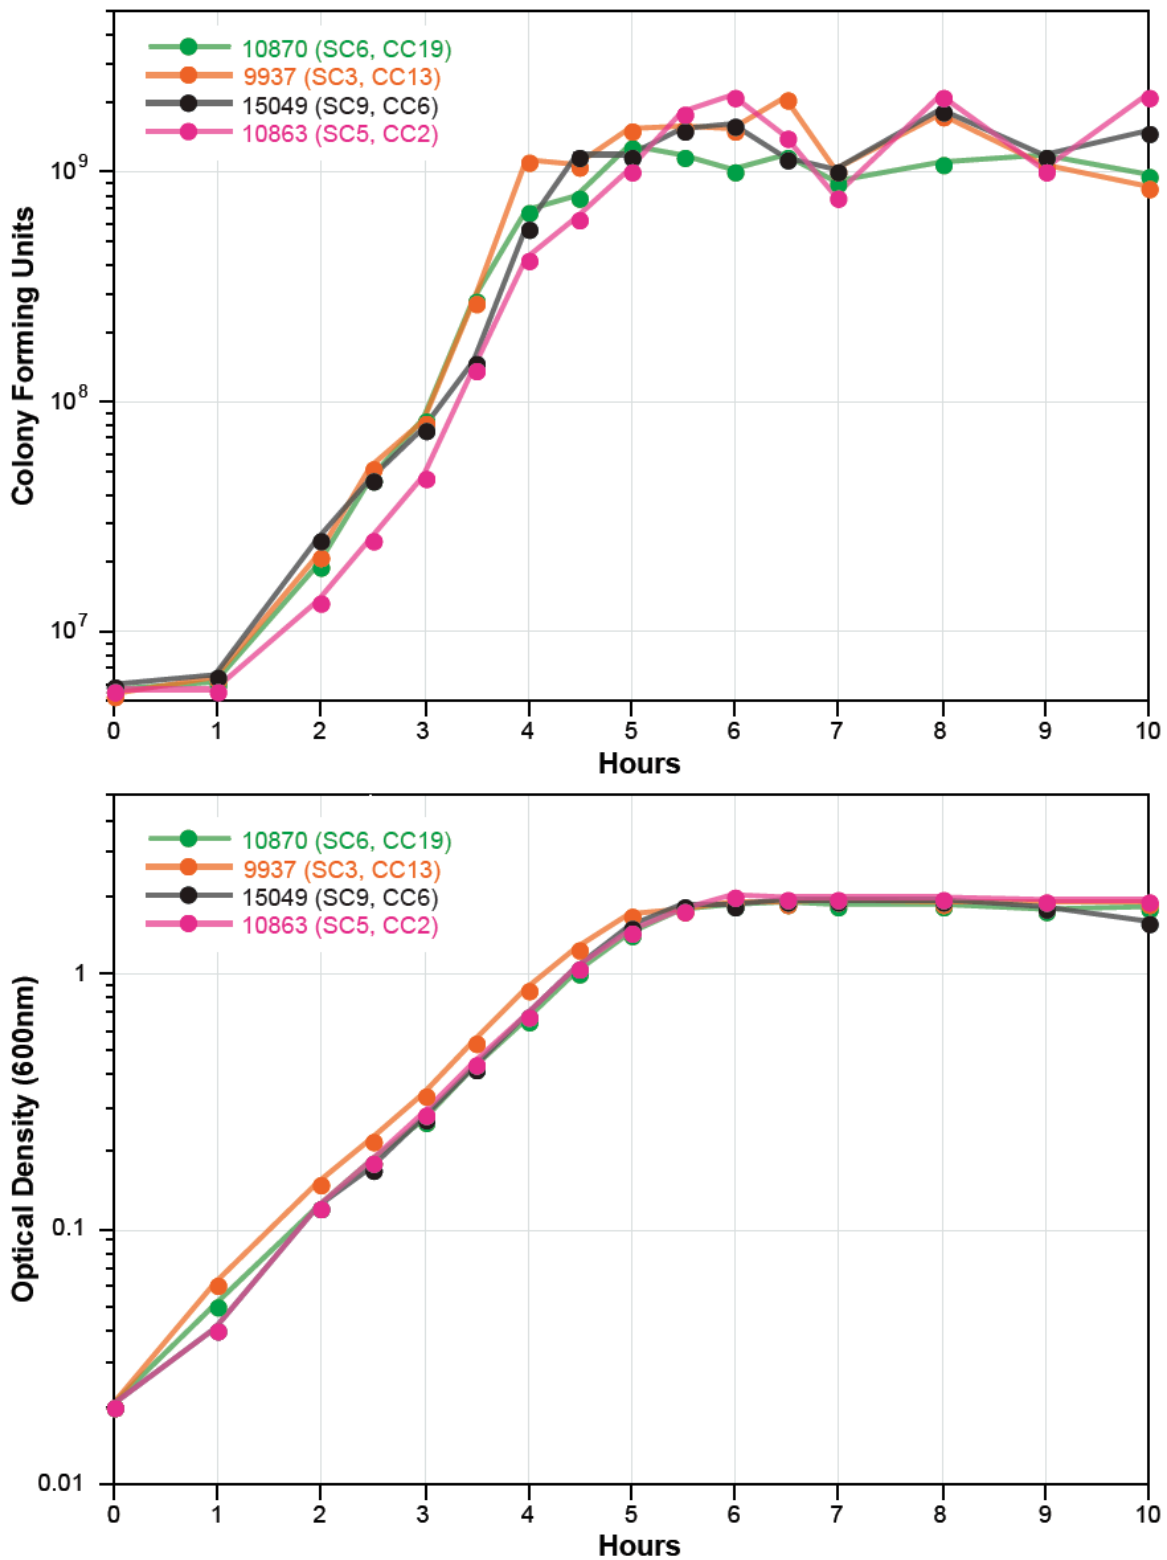

**Fig. S5.** Growth curves. Optical density measurements at 600 nm and CFU enumeration by quantitative plating were used to determine growth. RNA for expression microarray analysis was isolated from three replicate cultures harvested at two time points, mid-exponential phase ( $OD_{600} = 0.45$ ) and stationary phase (4 hours post mid-exponential harvest). Growth was virtually identical for all four strains.

**Table S1. Ontario GAS serotype M3 invasive isolate characteristics.**

| No. | Strain (MGAS) | Year | Infection Type        | <i>emm3</i> Allele | Phage Genotype | SNP <sub>15</sub> Haplotype | Subclone | SNP <sub>280</sub> Haplotype | Clonal Complex |
|-----|---------------|------|-----------------------|--------------------|----------------|-----------------------------|----------|------------------------------|----------------|
| 1   | 3664          | 1992 | lower respiratory     | 3.1                | 3.01           | 7                           |          | 50                           |                |
| 2   | 10733         | 1992 | osteomyolitis         | 3.1                | 3.01           | 7                           |          | 50                           |                |
| 3   | 3371          | 1992 | necrotizing fasciitis | 3.1                | 3.01           | 1                           | 1        | 20                           |                |
| 4   | 3671          | 1992 | arthritis             | 3.1                | 3.01           | 1                           | 1        | 27                           |                |
| 5   | 3370          | 1992 | lower respiratory     | 3.37               | 3.01           | 1                           |          | 19                           |                |
| 6   | 3672          | 1992 | osteomyolitis         | 3.17               | 3.08           | 6                           |          | 24                           |                |
| 7   | 3673          | 1992 | arthritis             | 3.17               | 3.08           | 6                           |          | 24                           |                |
| 8   | 3372          | 1992 | lower respiratory     | 3.1                | 3.03           | 1                           | 2        | 25                           | 10             |
| 9   | 3373          | 1992 | soft tissue           | 3.1                | 3.01           | 1                           | 1        | 20                           |                |
| 10  | 3675          | 1993 | necrotizing fasciitis | 3.1                | 3.03           | 2                           | 4        | 86                           | 14             |
| 11  | 3669          | 1993 | bacteremia            | 3.1                | 3.01           | 1                           | 1        | 22                           | 11             |
| 12  | 3676          | 1993 | soft tissue           | 3.1                | 3.09           | 3                           |          | 16                           | 21             |
| 13  | 10051         | 1993 | soft tissue           | 3.1                | 3.03           | 2                           | 4        | 86                           | 14             |
| 14  | 3677          | 1993 | arthritis             | 3.1                | 3.03           | 2                           | 4        | 86                           | 14             |
| 15  | 3678          | 1993 | lower respiratory     | 3.1                | 3.03           | 2                           | 4        | 86                           | 14             |
| 16  | 9999          | 1994 | lower respiratory     | 3.32               | 3.01           | 2                           |          | 77                           |                |
| 17  | 3374          | 1994 | lower respiratory     | 3.1                | 3.01           | 2                           | 3        | 94                           | 12             |
| 18  | 10000         | 1994 | bacteremia            | 3.18               | 3.01           | 5                           |          | 51                           |                |
| 19  | 10735         | 1994 | soft tissue           | 3.1                | 3.03           | 2                           | 4        | 84                           | 14             |
| 20  | 3375          | 1994 | lower respiratory     | 3.20               | 3.01           | 1                           |          | --                           |                |
| 21  | 3376          | 1994 | bacteremia            | 3.1                | 3.01           | 2                           | 3        | 82                           | 12             |
| 22  | 3378          | 1994 | necrotizing fasciitis | 3.1                | 3.03           | 2                           | 4        | 86                           | 14             |
| 23  | 10008         | 1994 | soft tissue           | 3.1                | 3.01           | 2                           | 3        | 94                           | 12             |
| 24  | 10011         | 1994 | soft tissue           | 3.1                | 3.01           | 2                           | 3        | 95                           | 12             |
| 25  | 10738         | 1994 | bacteremia            | 3.1                | 3.07           | 2                           |          | 92                           | 12             |
| 26  | 3379          | 1994 | lower respiratory     | 3.1                | 3.01           | 1                           | 1        | 27                           |                |
| 27  | 3380          | 1994 | soft tissue           | 3.1                | 3.01           | 2                           | 3        | 91                           | 12             |
| 28  | 10001         | 1994 | lower respiratory     | 3.1                | 3.01           | 1                           | 1        | 22                           | 11             |
| 29  | 3382          | 1994 | necrotizing fasciitis | 3.1                | 3.01           | 2                           | 3        | 95                           | 12             |
| 30  | 10002         | 1994 | lower respiratory     | 3.1                | 3.01           | 2                           | 3        | 94                           | 12             |
| 31  | 10009         | 1994 | necrotizing fasciitis | 3.1                | 3.01           | 2                           | 3        | 95                           | 12             |
| 32  | 10012         | 1994 | soft tissue           | 3.1                | 3.03           | 1                           | 2        | 29                           | 9              |
| 33  | 10003         | 1994 | arthritis             | 3.1                | 3.01           | 7                           |          | 50                           |                |
| 34  | 10004         | 1994 | lower respiratory     | 3.19               | 3.03           | 2                           |          | 85                           | 14             |
| 35  | 10005         | 1994 | lower respiratory     | 3.1                | 3.03           | 1                           | 2        | 29                           | 9              |
| 36  | 10010         | 1994 | soft tissue           | 3.1                | 3.01           | 1                           | 1        | 22                           | 11             |
| 37  | 10006         | 1994 | soft tissue           | 3.18               | 3.07           | 5                           |          | 51                           |                |
| 38  | 10737         | 1994 | soft tissue           | 3.20               | 3.01           | 1                           |          | 19                           |                |
| 39  | 3383          | 1994 | necrotizing fasciitis | 3.1                | 3.01           | 2                           | 3        | 79                           |                |
| 40  | 3384          | 1994 | necrotizing fasciitis | 3.1                | 3.01           | 2                           | 3        | --                           |                |
| 41  | 3385          | 1995 | arthritis             | 3.1                | 3.01           | 4                           |          | 23                           |                |
| 42  | 3387          | 1995 | lower respiratory     | 3.1                | 3.01           | 1                           | 1        | 27                           |                |
| 43  | 3424          | 1995 | bacteremia            | 3.1                | 3.03           | 1                           | 2        | 29                           | 9              |
| 44  | 3429          | 1995 | soft tissue           | 3.1                | 3.01           | 1                           | 1        | 27                           |                |
| 45  | 10025         | 1995 | arthritis             | 3.1                | 3.01           | 2                           | 3        | 95                           | 12             |
| 46  | 3390          | 1995 | necrotizing fasciitis | 3.1                | 3.01           | 1                           | 1        | 22                           | 11             |
| 47  | 3391          | 1995 | lower respiratory     | 3.1                | 3.03           | 1                           | 2        | 29                           | 9              |
| 48  | 3452          | 1995 | bacteremia            | 3.1                | 3.01           | 1                           | 1        | 22                           | 11             |
| 49  | 10399         | 1995 | necrotizing fasciitis | 3.1                | 3.01           | 2                           | 3        | 79                           |                |
| 50  | 3389          | 1995 | necrotizing fasciitis | 3.1                | 3.01           | 1                           | 1        | 27                           |                |
| 51  | 3392          | 1995 | necrotizing fasciitis | 3.1                | 3.01           | 1                           | 1        | 21                           | 11             |
| 52  | 3393          | 1995 | necrotizing fasciitis | 3.1                | 3.01           | 2                           | 3        | 79                           |                |

Table S1 cont.

| No. | Strain (MGAS) | Year | Infection Type        | <i>emm3</i> Allele | Phage Genotype | SNP <sub>15</sub> Haplotype | Subclone | SNP <sub>280</sub> Haplotype | Clonal Complex |
|-----|---------------|------|-----------------------|--------------------|----------------|-----------------------------|----------|------------------------------|----------------|
| 53  | 3394          | 1995 | necrotizing fasciitis | 3.1                | 3.03           | 1                           | 2        | 28                           | 9              |
| 54  | 3455          | 1995 | bacteremia            | 3.1                | 3.03           | 1                           | 2        | 29                           | 9              |
| 55  | 3465          | 1995 | bacteremia            | 3.1                | 3.01           | 1                           | 1        | 20                           |                |
| 56  | 3475          | 1995 | bacteremia            | 3.1                | 3.01           | 2                           | 3        | 81                           |                |
| 57  | 3484          | 1995 | soft tissue           | 3.1                | 3.03           | 1                           | 2        | 30                           | 9              |
| 58  | 3485          | 1995 | soft tissue           | 3.1                | 3.01           | 5                           |          | 52                           |                |
| 59  | 10739         | 1995 | necrotizing fasciitis | 3.1                | 3.03           | 1                           | 2        | 29                           | 9              |
| 60  | 3395          | 1995 | necrotizing fasciitis | 3.1                | 3.03           | 2                           | 4        | 86                           | 14             |
| 61  | 3396          | 1995 | necrotizing fasciitis | 3.1                | 3.03           | 1                           | 2        | 29                           | 9              |
| 62  | 3397          | 1995 | soft tissue           | 3.1                | 3.01           | 5                           |          | 52                           |                |
| 63  | 3398          | 1995 | necrotizing fasciitis | 3.1                | 3.03           | 1                           | 2        | 29                           | 9              |
| 64  | 3399          | 1995 | necrotizing fasciitis | 3.1                | 3.01           | 1                           | 1        | 27                           |                |
| 65  | 10021         | 1995 | soft tissue           | 3.1                | 3.01           | 2                           | 3        | 80                           |                |
| 66  | 10022         | 1995 | bacteremia            | 3.1                | 3.01           | 1                           | 1        | 22                           | 11             |
| 67  | 10023         | 1995 | bacteremia            | 3.1                | 3.01           | 2                           | 3        | 93                           | 12             |
| 68  | 10740         | 1995 | osteomyolitis         | 3.1                | 3.03           | 1                           | 2        | 29                           | 9              |
| 69  | 10024         | 1995 | arthritis             | 3.1                | 3.03           | 2                           | 4        | 86                           | 14             |
| 70  | 10026         | 1995 | peritonitis           | 3.1                | 3.01           | 1                           | 1        | 22                           | 11             |
| 71  | 10027         | 1995 | gynecological         | 3.21               | 3.01           | 5                           |          | 52                           |                |
| 72  | 10028         | 1995 | meningitis            | 3.1                | 3.01           | 1                           | 1        | 22                           | 11             |
| 73  | 10029         | 1995 | necrotizing fasciitis | 3.1                | 3.01           | 2                           | 3        | 93                           | 12             |
| 74  | 10030         | 1995 | upper respiratory     | 3.1                | 3.04           | 2                           |          | 87                           | 14             |
| 75  | 10031         | 1995 | bacteremia            | 3.1                | 3.03           | 1                           | 2        | 29                           | 9              |
| 76  | 10741         | 1995 | lower respiratory     | 3.22               | 3.01           | 1                           |          | 27                           |                |
| 77  | 10742         | 1995 | arthritis             | 3.1                | 3.03           | 2                           | 4        | 97                           | 14             |
| 78  | 10034         | 1995 | lower respiratory     | 3.1                | 3.03           | 2                           | 4        | 96                           | 14             |
| 79  | 10035         | 1996 | necrotizing fasciitis | 3.1                | 3.01           | 2                           | 3        | 95                           | 12             |
| 80  | 10037         | 1996 | lower respiratory     | 3.1                | 3.03           | 2                           | 4        | 83                           | 14             |
| 81  | 10743         | 1996 | lower respiratory     | 3.1                | 3.03           | 1                           | 2        | 26                           | 10             |
| 82  | 10038         | 1996 | bacteremia            | 3.1                | 3.01           | 1                           | 1        | 22                           | 11             |
| 83  | 10744         | 1996 | lower respiratory     | 3.1                | 3.04           | 2                           |          | 87                           | 14             |
| 84  | 10040         | 1996 | surgical              | 3.1                | 3.01           | 2                           | 3        | 33                           | 15             |
| 85  | 10041         | 1996 | necrotizing fasciitis | 3.1                | 3.04           | 2                           |          | 87                           | 14             |
| 86  | 10042         | 1996 | peritonitis           | 3.1                | 3.01           | 2                           | 3        | 81                           |                |
| 87  | 10043         | 1996 | bacteremia            | 3.1                | 3.01           | 2                           | 3        | 81                           |                |
| 88  | 10044         | 1996 | necrotizing fasciitis | 3.1                | 3.04           | 2                           |          | 87                           | 14             |
| 89  | 10400         | 1996 | upper respiratory     | 3.1                | 3.01           | 4                           | 7        | 23                           |                |
| 90  | 10045         | 1996 | bacteremia            | 3.1                | 3.01           | 2                           | 3        | 33                           | 15             |
| 91  | 10046         | 1996 |                       | 3.1                | 3.03           | 2                           | 4        | 85                           | 14             |
| 92  | 10047         | 1996 | soft tissue           | 3.1                | 3.01           | 2                           | 3        | 90                           | 13             |
| 93  | 10048         | 1996 | bacteremia            | 3.1                | 3.01           | 2                           | 3        | 33                           | 15             |
| 94  | 10049         | 1997 | pharyngeal            | 3.1                | 3.01           | 1                           | 1        | 22                           | 11             |
| 95  | 10050         | 1997 | necrotizing fasciitis | 3.23               | 3.03           | 1                           | 2        | 26                           | 10             |
| 96  | 9977          | 1998 | lower respiratory     | 3.1                | 3.03           | 1                           | 2        | 26                           | 10             |
| 97  | 9978          | 1998 | arthritis             | 3.1                | 3.01           | 9                           |          | 37                           |                |
| 98  | 9979          | 1998 | arthritis             | 3.1                | 3.01           | 2                           | 3        | 33                           | 15             |
| 99  | 9980          | 1999 | upper respiratory     | 3.1                | 3.05           | 3                           |          | 10                           | 17             |
| 100 | 9981          | 1999 | lower respiratory     | 3.1                | 3.03           | 2                           | 4        | 93                           | 12             |
| 101 | 9982          | 1999 | necrotizing fasciitis | 3.1                | 3.01           | 2                           | 3        | 89                           | 13             |
| 102 | 9983          | 1999 | necrotizing fasciitis | 3.1                | 3.02           | 3                           | 6        | 45                           | 20             |
| 103 | 9984          | 1999 | necrotizing fasciitis | 3.1                | 3.01           | 2                           | 3        | 89                           | 13             |
| 104 | 9985          | 1999 | soft tissue           | 3.1                | 3.02           | 3                           | 6        | 5                            | 18             |
| 105 | 9986          | 1999 | soft tissue           | 3.1                | 3.02           | 3                           | 6        | 6                            | 20             |

Table S1 cont.

| No. | Strain (MGAS) | Year | Infection Type        | <i>emm3</i> Allele | Phage Genotype | SNP <sub>15</sub> Haplotype | Subclone | SNP <sub>280</sub> Haplotype | Clonal Complex |
|-----|---------------|------|-----------------------|--------------------|----------------|-----------------------------|----------|------------------------------|----------------|
| 106 | 9987          | 1999 | soft tissue           | 3.1                | 3.01           | 2                           | 3        | 88                           | 13             |
| 107 | 9988          | 1999 | soft tissue           | 3.1                | 3.02           | 3                           | 6        | 10                           | 17             |
| 108 | 9989          | 1999 | arthritis             | 3.1                | 3.01           | 2                           | 3        | 89                           | 13             |
| 109 | 9990          | 1999 | bacteremia            | 3.1                | 3.01           | 1                           | 1        | 62                           | 2              |
| 110 | 9878          | 2000 | soft tissue           | 3.1                | 3.02           | 3                           | 6        | 46                           | 19             |
| 111 | 9879          | 2000 | necrotizing fasciitis | 3.1                | 3.01           | 2                           | 3        | 89                           | 13             |
| 112 | 9880          | 2000 | necrotizing fasciitis | 3.1                | 3.01           | 2                           | 3        | 89                           | 13             |
| 113 | 9881          | 2000 | arthritis             | 3.1                | 3.01           | 1                           | 1        | 43                           | 7              |
| 114 | 9882          | 2000 | soft tissue           | 3.2                | 3.01           | 1                           | 5        | 62                           | 2              |
| 115 | 9883          | 2000 | lower respiratory     | 3.1                | 3.02           | 3                           | 6        | 46                           | 19             |
| 116 | 9884          | 2000 | upper respiratory     | 3.31               | 3.01           | 1                           |          | 73                           | 1              |
| 117 | 9885          | 2000 | upper respiratory     | 3.2                | 3.01           | 1                           | 5        | 75                           | 1              |
| 118 | 9886          | 2000 | upper respiratory     | 3.1                | 3.02           | 3                           | 6        | 5                            | 18             |
| 119 | 9887          | 2000 | bacteremia            | 3.2                | 3.01           | 1                           | 5        | 64                           | 2              |
| 120 | 9888          | 2000 | soft tissue           | 3.1                | 3.02           | 3                           | 6        | 46                           | 19             |
| 121 | 9889          | 2000 | lower respiratory     | 3.1                | 3.02           | 3                           | 6        | 45                           | 20             |
| 122 | 9890          | 2000 | bacteremia            | 3.1                | 3.01           | 1                           | 1        | 44                           | 7              |
| 123 | 9892          | 2000 | soft tissue           | 3.1                | 3.02           | 3                           | 6        | 45                           | 20             |
| 124 | 9893          | 2000 | meningitis            | 3.2                | 3.01           | 1                           | 5        | 72                           |                |
| 125 | 9894          | 2000 | necrotizing fasciitis | 3.1                | 3.01           | 1                           | 1        | 44                           | 7              |
| 126 | 9895          | 2000 | osteomyolitis         | 3.1                | 3.05           | 3                           |          | 5                            | 18             |
| 127 | 9896          | 2000 | bacteremia            | 3.1                | 3.02           | 3                           | 6        | 46                           | 19             |
| 128 | 9897          | 2000 | lower respiratory     | 3.1                | 3.01           | 2                           | 3        | 89                           | 13             |
| 129 | 9898          | 2000 | peritonitis           | 3.1                | 3.02           | 3                           | 6        | 45                           | 20             |
| 130 | 9953          | 2000 | lower respiratory     | 3.1                | 3.01           | 4                           | 7        | 31                           | 16             |
| 131 | 10745         | 2000 | soft tissue           | 3.30               | 3.02           | 10                          |          | 45                           | 20             |
| 132 | 9899          | 2000 | necrotizing fasciitis | 3.1                | 3.02           | 3                           | 6        | 46                           | 19             |
| 133 | 9900          | 2000 | arthritis             | 3.1                | 3.02           | 3                           | 6        | 46                           | 19             |
| 134 | 9901          | 2000 | arthritis             | 3.1                | 3.02           | 3                           | 6        | 9                            | 20             |
| 135 | 9902          | 2000 | upper respiratory     | 3.1                | 3.01           | 2                           | 3        | 89                           | 13             |
| 136 | 9903          | 2000 | lower respiratory     | 3.1                | 3.02           | 3                           | 6        | 46                           | 19             |
| 137 | 9904          | 2000 | arthritis             | 3.1                | 3.02           | 3                           | 6        | 45                           | 20             |
| 138 | 9905          | 2000 | soft tissue           | 3.1                | 3.02           | 3                           | 6        | 46                           | 19             |
| 139 | 9906          | 2000 | upper respiratory     | 3.1                | 3.01           | 2                           | 3        | 89                           | 13             |
| 140 | 9907          | 2000 | arthritis             | 3.2                | 3.01           | 1                           | 5        | 62                           | 2              |
| 141 | 9908          | 2000 | bacteremia            | 3.24               | 3.01           | 1                           | 5        | 56                           |                |
| 142 | 9909          | 2000 | lower respiratory     | 3.1                | 3.01           | 2                           | 3        | 89                           | 13             |
| 143 | 9910          | 2000 | arthritis             | 3.31               | 3.01           | 1                           |          | 73                           | 1              |
| 144 | 9911          | 2000 | necrotizing fasciitis | 3.1                | 3.01           | 1                           | 1        | 1                            | 1              |
| 145 | 9927          | 2000 | soft tissue           | 3.1                | 3.01           | 2                           | 3        | 89                           | 13             |
| 146 | 9967          | 2000 | necrotizing fasciitis | 3.1                | 3.01           | 1                           | 1        | 44                           | 7              |
| 147 | 10396         | 2000 | soft tissue           | 3.2                | 3.01           | 1                           | 5        | 62                           | 2              |
| 148 | 9254          | 2000 | peritonitis           | 3.2                | 3.01           | 1                           | 5        | 75                           | 1              |
| 149 | 9912          | 2000 | lower respiratory     | 3.1                | 3.01           | 2                           | 3        | 89                           | 13             |
| 150 | 9913          | 2000 | soft tissue           | 3.1                | 3.06           | 3                           |          | 46                           | 19             |
| 151 | 9914          | 2000 | soft tissue           | 3.1                | 3.01           | 1                           | 1        | 62                           | 2              |
| 152 | 9915          | 2000 | bacteremia            | 3.1                | 3.02           | 3                           | 6        | 10                           | 17             |
| 153 | 9916          | 2000 | soft tissue           | 3.1                | 3.02           | 3                           | 6        | 46                           | 19             |
| 154 | 9917          | 2000 | soft tissue           | 3.1                | 3.05           | 3                           |          | 4                            | 18             |
| 155 | 9918          | 2000 | soft tissue           | 3.1                | 3.02           | 3                           | 6        | 13                           |                |
| 156 | 9919          | 2000 | necrotizing fasciitis | 3.1                | 3.02           | 3                           | 6        | 47                           | 19             |
| 157 | 9921          | 2000 | soft tissue           | 3.1                | 3.01           | 1                           | 1        | 44                           | 7              |
| 158 | 9922          | 2000 | soft tissue           | 3.2                | 3.01           | 1                           | 5        | 62                           | 2              |

Table S1 cont.

| No. | Strain (MGAS) | Year | Infection Type        | <i>emm3</i> Allele | Phage Genotype | SNP <sub>15</sub> Haplotype | Subclone | SNP <sub>280</sub> Haplotype | Clonal Complex |
|-----|---------------|------|-----------------------|--------------------|----------------|-----------------------------|----------|------------------------------|----------------|
| 159 | 9923          | 2000 | soft tissue           | 3.1                | 3.02           | 3                           | 6        | 5                            | 18             |
| 160 | 9924          | 2000 | peritonitis           | 3.2                | 3.01           | 1                           | 5        | 62                           | 2              |
| 161 | 9925          | 2000 | peritonitis           | 3.1                | 3.02           | 3                           | 6        | 46                           | 19             |
| 162 | 9926          | 2000 | arthritis             | 3.1                | 3.01           | 2                           | 3        | 89                           | 13             |
| 163 | 9928          | 2000 | lower respiratory     | 3.2                | 3.01           | 1                           | 5        | 62                           | 2              |
| 164 | 9929          | 2000 | lower respiratory     | 3.2                | 3.01           | 1                           | 5        | 75                           | 1              |
| 165 | 9930          | 2000 | necrotizing fasciitis | 3.1                | 3.02           | 3                           | 6        | 46                           | 19             |
| 166 | 9931          | 2000 | bacteremia            | 3.1                | 3.01           | 2                           | 3        | 89                           | 13             |
| 167 | 9932          | 2000 | bacteremia            | 3.2                | 3.01           | 1                           | 5        | 62                           | 2              |
| 168 | 9933          | 2000 | soft tissue           | 3.1                | 3.02           | 3                           | 6        | 46                           | 19             |
| 169 | 9934          | 2000 | soft tissue           | 3.1                | 3.01           | 2                           | 3        | 77                           |                |
| 170 | 9935          | 2000 | surgical              | 3.1                | 3.02           | 6                           |          | 45                           | 20             |
| 171 | 9936          | 2000 | lower respiratory     | 3.1                | 3.01           | 1                           | 1        | 62                           | 2              |
| 172 | 9951          | 2000 | arthritis             | 3.2                | 3.01           | 1                           | 5        | 75                           | 1              |
| 173 | 9937          | 2000 | soft tissue           | 3.1                | 3.01           | 2                           | 3        | 89                           | 13             |
| 174 | 9939          | 2000 | upper respiratory     | 3.31               | 3.01           | 1                           |          | 1                            | 1              |
| 175 | 9941          | 2000 | soft tissue           | 3.2                | 3.01           | 1                           | 5        |                              |                |
| 176 | 9942          | 2000 | soft tissue           | 3.1                | 3.02           | 3                           | 6        | 5                            | 18             |
| 177 | 9943          | 2000 | upper respiratory     | 3.2                | 3.01           | 1                           | 5        | 62                           | 2              |
| 178 | 9944          | 2000 | bacteremia            | 3.2                | 3.01           | 1                           | 5        | 64                           | 2              |
| 179 | 9945          | 2000 | soft tissue           | 3.2                | 3.01           | 1                           | 5        | 75                           | 1              |
| 180 | 9947          | 2000 | bacteremia            | 3.1                | 3.01           | 4                           | 7        | 31                           | 16             |
| 181 | 9948          | 2000 | soft tissue           | 3.1                | 3.01           | 1                           | 1        | 44                           | 7              |
| 182 | 9954          | 2000 | soft tissue           | 3.31               | 3.01           | 1                           |          |                              |                |
| 183 | 9958          | 2000 | upper respiratory     | 3.1                | 3.01           | 1                           | 1        | 7                            |                |
| 184 | 10746         | 2000 | upper respiratory     | 3.2                | 3.01           | 1                           | 5        | 75                           | 1              |
| 185 | 10747         | 2000 | bacteremia            | 3.1                | 3.01           | 4                           | 7        | 31                           | 16             |
| 186 | 9949          | 2000 | bacteremia            | 3.2                | 3.01           | 1                           | 5        | 75                           | 1              |
| 187 | 9952          | 2000 | soft tissue           | 3.2                | 3.01           | 1                           | 5        | 62                           | 2              |
| 188 | 9955          | 2000 | upper respiratory     | 3.1                | 3.02           | 3                           | 6        | 45                           | 20             |
| 189 | 9956          | 2000 | bacteremia            | 3.2                | 3.01           | 1                           | 5        | 62                           | 2              |
| 190 | 9957          | 2000 | arthritis             | 3.2                | 3.01           | 1                           | 5        | 75                           | 1              |
| 191 | 10749         | 2000 | soft tissue           | 3.24               | 3.01           | 1                           |          | 57                           |                |
| 192 | 9959          | 2000 | peritonitis           | 3.1                | 3.01           | 4                           | 7        | 31                           | 16             |
| 193 | 9960          | 2000 | lower respiratory     | 3.1                | 3.01           | 4                           | 7        | 31                           | 16             |
| 194 | 9961          | 2000 | bacteremia            | 3.2                | 3.01           | 1                           | 5        | 75                           | 1              |
| 195 | 9962          | 2000 | lower respiratory     | 3.1                | 3.01           | 1                           | 1        | 62                           | 2              |
| 196 | 9963          | 2000 | soft tissue           | 3.1                | 3.01           | 2                           | 3        | 89                           | 13             |
| 197 | 9964          | 2000 | arthritis             | 3.2                | 3.01           | 1                           |          | 8                            |                |
| 198 | 9965          | 2000 | lower respiratory     | 3.2                | 3.01           | 1                           | 5        | 62                           | 2              |
| 199 | 9968          | 2000 | soft tissue           | 3.1                | 3.01           | 2                           | 3        | 89                           | 13             |
| 200 | 10398         | 2000 | adenitis              | 3.1                | 3.02           | 3                           | 6        | 5                            | 18             |
| 201 | 9966          | 2000 | bacteremia            | 3.1                | 3.02           | 3                           | 6        | 46                           | 19             |
| 202 | 9969          | 2000 | bacteremia            | 3.1                | 3.02           | 3                           | 6        | 46                           | 19             |
| 203 | 9971          | 2000 | arthritis             | 3.1                | 3.01           | 1                           | 1        | 44                           | 7              |
| 204 | 9972          | 2000 | bacteremia            | 3.1                | 3.01           | 2                           | 3        | 89                           | 13             |
| 205 | 9973          | 2000 | soft tissue           | 3.1                | 3.06           | 6                           |          | 14                           |                |
| 206 | 9974          | 2000 | bacteremia            | 3.1                | 3.01           | 4                           | 7        | 31                           | 16             |
| 207 | 9970          | 2000 | soft tissue           | 3.2                | 3.01           | 1                           | 5        | 62                           | 2              |
| 208 | 10829         | 2001 | soft tissue           | 3.24               | 3.01           | 1                           | 5        | 1                            | 1              |
| 209 | 10830         | 2001 | upper respiratory     | 3.24               | 3.01           | 1                           |          | 53                           |                |
| 210 | 10831         | 2001 | empyema               | 3.2                | 3.01           | 1                           | 5        | 69                           | 4              |
| 211 | 10832         | 2001 | arthritis             | 3.1                | 3.02           | 3                           | 6        | 46                           | 19             |

Table S1 cont.

| No. | Strain (MGAS) | Year | Infection Type        | <i>emm3</i> Allele | Phage Genotype | SNP <sub>15</sub> Haplotype | Subclone | SNP <sub>280</sub> Haplotype | Clonal Complex |
|-----|---------------|------|-----------------------|--------------------|----------------|-----------------------------|----------|------------------------------|----------------|
| 212 | 10833         | 2001 | lower respiratory     | 3.2                | 3.01           | 1                           | 5        | 62                           | 2              |
| 213 | 10834         | 2001 | soft tissue           | 3.2                | 3.01           | 8                           |          | 70                           |                |
| 214 | 10835         | 2001 | bacteremia            | 3.2                | 3.01           | 1                           | 5        | 75                           | 1              |
| 215 | 10836         | 2001 | soft tissue           | 3.1                | 3.02           | 3                           | 6        | 46                           | 19             |
| 216 | 10837         | 2001 | bacteremia            | 3.1                | 3.05           | 3                           |          | 46                           | 19             |
| 217 | 10838         | 2001 | soft tissue           | 3.1                | 3.01           | 1                           | 1        | 7                            |                |
| 218 | 10839         | 2001 | lower respiratory     | 3.2                | 3.01           | 1                           | 5        | 53                           |                |
| 219 | 10840         | 2001 | meningitis            | 3.1                | 3.02           | 3                           | 6        | 12                           | 17             |
| 220 | 10841         | 2001 | bacteremia            | 3.2                | 3.01           | 1                           | 5        | 62                           | 2              |
| 221 | 10842         | 2001 | arthritis             | 3.1                | 3.01           | 2                           | 3        | 89                           | 13             |
| 222 | 10843         | 2001 | soft tissue           | 3.1                | 3.02           | 3                           | 6        | 5                            | 18             |
| 223 | 10844         | 2001 | necrotizing fasciitis | 3.1                | 3.02           | 3                           | 6        | 46                           | 19             |
| 224 | 10845         | 2001 | necrotizing fasciitis | 3.1                | 3.02           | 3                           | 6        | 46                           | 19             |
| 225 | 10846         | 2001 | lower respiratory     | 3.1                | 3.01           | 4                           | 7        | 32                           | 16             |
| 226 | 10847         | 2001 | arthritis             | 3.1                | 3.02           | 3                           | 6        | 46                           | 19             |
| 227 | 10848         | 2001 | bacteremia            | 3.1                | 3.01           | 4                           | 7        | 32                           | 16             |
| 228 | 10849         | 2001 | lower respiratory     | 3.25               | 3.01           | 4                           |          | 32                           | 16             |
| 229 | 10850         | 2001 | soft tissue           | 3.2                | 3.01           | 1                           | 5        | 62                           | 2              |
| 230 | 10851         | 2001 | lower respiratory     | 3.2                | 3.01           | 1                           | 5        | 62                           | 2              |
| 231 | 10852         | 2001 | arthritis             | 3.2                | 3.01           | 1                           | 5        | 62                           | 2              |
| 232 | 10853         | 2001 | upper respiratory     | 3.2                | 3.01           | 1                           | 5        | 62                           | 2              |
| 233 | 10854         | 2001 | lower respiratory     | 3.1                | 3.01           | 4                           | 7        | 31                           | 16             |
| 234 | 10855         | 2001 | empyema               | 3.1                | 3.02           | 3                           | 6        | 5                            | 18             |
| 235 | 10856         | 2001 | soft tissue           | 3.26               | 3.01           | 1                           |          | 62                           | 2              |
| 236 | 10857         | 2001 | bacteremia            | 3.2                | 3.01           | 1                           | 5        | 62                           | 2              |
| 237 | 10858         | 2001 | peripartum            | 3.1                | 3.02           | 3                           | 6        | 46                           | 19             |
| 238 | 10859         | 2001 | necrotizing fasciitis | 3.2                | 3.01           | 1                           | 5        | 70                           |                |
| 239 | 10860         | 2001 | necrotizing fasciitis | 3.1                | 3.02           | 3                           | 6        | 46                           | 19             |
| 240 | 10861         | 2001 | arthritis             | 3.1                | 3.01           | 1                           | 1        | 44                           | 7              |
| 241 | 10863         | 2001 | arthritis             | 3.2                | 3.01           | 1                           | 5        | 63                           | 2              |
| 242 | 10862         | 2001 | arthritis             | 3.2                | 3.01           | 1                           | 5        | 75                           | 1              |
| 243 | 10864         | 2001 | soft tissue           | 3.1                | 3.02           | 3                           | 6        | 46                           | 19             |
| 244 | 10865         | 2001 | arthritis             | 3.1                | 3.02           | 3                           | 6        | 11                           | 17             |
| 245 | 10866         | 2001 | lower respiratory     | 3.2                | 3.01           | 1                           | 5        | 75                           | 1              |
| 246 | 10867         | 2001 | soft tissue           | 3.1                | 3.02           | 3                           | 6        | 13                           |                |
| 247 | 10868         | 2001 | soft tissue           | 3.2                | 3.01           | 1                           | 5        | 75                           | 1              |
| 248 | 10869         | 2001 | arthritis             | 3.1                | 3.02           | 3                           | 6        | 5                            | 18             |
| 249 | 10870         | 2002 | soft tissue           | 3.1                | 3.02           | 3                           | 6        | 46                           | 19             |
| 250 | 10871         | 2002 | lower respiratory     | 3.2                | 3.01           | 1                           | 5        | 68                           | 4              |
| 251 | 10872         | 2002 | necrotizing fasciitis | 3.1                | 3.02           | 3                           | 6        | 12                           | 17             |
| 252 | 10873         | 2002 | arthritis             | 3.27               | 3.01           | 1                           |          | 38                           |                |
| 253 | 10874         | 2002 | bacteremia            | 3.2                | 3.01           | 1                           | 5        | 62                           | 2              |
| 254 | 10875         | 2002 | necrotizing fasciitis | 3.1                | 3.01           | 1                           | 1        | 42                           |                |
| 255 | 10876         | 2002 | necrotizing fasciitis | 3.29               | 3.02           | 3                           |          | 12                           | 17             |
| 256 | 15000         | 2003 | renal PT              | 3.1                | 3.02           | 3                           | 6        | 46                           | 19             |
| 257 | 15001         | 2003 | necrotizing fasciitis | 3.2                | 3.01           | 1                           | 5        | 76                           |                |
| 258 | 15004         | 2003 | soft tissue           | 3.1                | 3.02           | 3                           | 6        | 46                           | 19             |
| 259 | 15002         | 2003 | pneumonia             | 3.1                | 3.02           | 3                           | 6        | 12                           | 17             |
| 260 | 15003         | 2003 | pyrexia               | 3.1                | 3.02           | 3                           | 6        | 46                           | 19             |
| 261 | 15005         | 2003 | bacteremia            | 3.2                | 3.01           | 1                           | 5        | 61                           | 5              |
| 262 | 15006         | 2003 | bacteremia            | 3.2                | 3.03           | 1                           |          | 61                           | 5              |
| 263 | 15008         | 2003 | bacteremia            | 3.2                | 3.10           | 1                           | 8        | 62                           | 2              |
| 264 | 15007         | 2003 | peritonitis           | 3.2                | 3.01           | 1                           | 5        | 62                           | 2              |



Table S1 cont.

| No. | Strain (MGAS) | Year | Infection Type        | <i>emm3</i> Allele | Phage Genotype | SNP <sub>15</sub> Haplotype | Subclone | SNP <sub>280</sub> Haplotype | Clonal Complex |
|-----|---------------|------|-----------------------|--------------------|----------------|-----------------------------|----------|------------------------------|----------------|
| 265 | 15009         | 2004 | bacteremia            | 3.2                | 3.10           | 1                           |          | 55                           | 2              |
| 266 | 15010         | 2004 | fever R/O endoc       | 3.26               | 3.07           | 4                           |          | 15                           |                |
| 267 | 15011         | 2004 | bacteremia            | 3.2                | 3.01           | 1                           | 5        | 62                           | 2              |
| 268 | 15012         | 2004 | arthritis             | 3.2                | 3.01           | 1                           | 5        | 62                           | 2              |
| 269 | 15013         | 2005 | lower respiratory     | 3.2                | 3.01           | 1                           | 5        | 59                           | 5              |
| 270 | 15014         | 2005 | soft tissue           | 3.1                | 3.01           | 1                           | 1        | 59                           | 5              |
| 271 | 15015         | 2005 | soft tissue           | 3.35               | 3.01           | 1                           | 9        | 41                           | 6              |
| 272 | 15016         | 2005 | lower respiratory     | 3.35               | 3.01           | 1                           | 9        | 41                           | 6              |
| 273 | 15017         | 2005 | toxic shock           | 3.1                | 3.02           | 3                           | 6        | 48                           |                |
| 274 | 15018         | 2005 | soft tissue           | 3.2                | 3.01           | 1                           | 5        | 59                           | 5              |
| 275 | 15019         | 2005 | bacteremia            | 3.1                | 3.07           | 1                           | 10       | 35                           | 8              |
| 276 | 15020         | 2005 | necrotizing fasciitis | 3.2                | 3.10           | 1                           | 8        | 74                           | 3              |
| 277 | 15021         | 2005 | necrotizing fasciitis | 3.2                | 3.10           | 1                           | 8        | 66                           | 3              |
| 278 | 15022         | 2005 | lower respiratory     | 3.2                | 3.01           | 1                           | 5        | 59                           | 5              |
| 279 | 15023         | 2005 | pericarditis          | 3.1                | 3.07           | 1                           | 10       | 35                           | 8              |
| 280 | 15024         | 2005 | soft tissue           | 3.1                | 3.07           | 1                           | 10       | 35                           | 8              |
| 281 | 15025         | 2005 | fever, urosepsis      | 3.26               | 3.07           | 4                           |          | 15                           |                |
| 282 | 15026         | 2005 |                       | 3.2                | 3.01           | 1                           | 5        | 59                           | 5              |
| 283 | 15027         | 2005 | necrotizing fasciitis | 3.2                | 3.07           | 1                           | 8        | 58                           |                |
| 284 | 15028         | 2005 | scarlet fever         | 3.35               | 3.01           | 1                           | 9        | 41                           | 6              |
| 285 | 15029         | 2005 | soft tissue           | 3.2                | 3.10           | 1                           | 8        | 65                           | 3              |
| 286 | 15030         | 2005 | bacteremia            | 3.35               | 3.01           | 1                           | 9        | 41                           | 6              |
| 287 | 15031         | 2005 |                       | 3.35               | 3.01           | 1                           | 9        | 41                           | 6              |
| 288 | 15034         | 2005 | fever, lymphangitis   | 3.35               | 3.01           | 1                           | 9        | 41                           | 6              |
| 289 | 15035         | 2005 | soft tissue           | 3.1                | 3.07           | 1                           | 10       | 35                           | 8              |
| 290 | 15036         | 2005 | lower respiratory     | 3.1                | 3.01           | 2                           | 3        | 78                           | 15             |
| 291 | 15037         | 2005 | preterm labor         | 3.1                | 3.01           | 2                           | 3        | 78                           | 15             |
| 292 | 15038         | 2005 | lower respiratory     | 3.1                | 3.02           | 3                           | 6        | 49                           |                |
| 293 | 15040         | 2005 | upper respiratory     | 3.2                | 3.01           | 1                           | 5        | 59                           | 5              |
| 294 | 15039         | 2005 | lower respiratory     | 3.1                | 3.01           | 1                           | 1        | 35                           | 8              |
| 295 | 15041         | 2005 |                       | 3.2                | 3.07           | 1                           | 8        | 66                           | 3              |
| 296 | 15042         | 2005 |                       | 3.26               | 3.07           | 4                           |          | 15                           |                |
| 297 | 15043         | 2005 |                       | 3.35               | 3.01           | 1                           | 9        | 39                           | 6              |
| 298 | 15032         | 2005 | abcess                | 3.2                | 3.01           | 1                           | 5        | 59                           | 5              |
| 299 | 15033         | 2005 | inguinal              | 3.2                | 3.07           | 1                           | 8        | 66                           | 3              |
| 300 | 15044         | 2006 | bacteremia            | 3.1                | 3.07           | 1                           | 10       | 35                           | 8              |
| 301 | 15045         | 2006 | post operative        | 3.35               | 3.07           | 1                           |          | 41                           | 6              |
| 302 | 15046         | 2006 | bacteremia            | 3.2                | 3.01           | 1                           | 5        | 59                           | 5              |
| 303 | 15047         | 2006 | bacteremia            | 3.2                | 3.07           | 1                           | 8        | 67                           | 3              |
| 304 | 15048         | 2006 | lower respiratory     | 3.1                | 3.01           | 1                           | 1        | 34                           | 8              |
| 305 | 15049         | 2006 | lower respiratory     | 3.35               | 3.01           | 1                           | 9        | 41                           | 6              |
| 306 | 15050         | 2006 | lower respiratory     | 3.1                | 3.01           | 1                           | 1        | 36                           |                |
| 307 | 15051         | 2006 | necrotizing fasciitis | 3.1                | 3.07           | 1                           | 10       | 35                           | 8              |
| 308 | 15052         | 2006 | soft tissue           | 3.35               | 3.01           | 1                           | 9        | 41                           | 6              |
| 309 | 15053         | 2006 | arthritis             | 3.2                | 3.07           | 1                           | 8        | 66                           | 3              |
| 310 | 15054         | 2006 | bacteremia            | 3.2                | 3.01           | 1                           | 5        | 62                           | 2              |
| 311 | 15055         | 2006 | bacteremia            | 3.1                | 3.07           | 1                           | 10       | 35                           | 8              |
| 312 | 15056         | 2006 | fascial cellulitis    | 3.1                | 3.07           | 1                           | 10       | 34                           | 8              |
| 313 | 15057         | 2006 | lower respiratory     | 3.2                | 3.07           | 1                           | 8        | 66                           | 3              |
| 314 | 15058         | 2006 | necrotizing fasciitis | 3.1                | 3.02           | 3                           | 6        | 3                            |                |
| 315 | 15059         | 2006 | bacteremia            | 3.2                | 3.01           | 1                           | 5        | 60                           | 5              |
| 316 | 15060         | 2006 | soft tissue           | 3.1                | 3.07           | 1                           | 10       | 34                           | 8              |
| 317 | 15061         | 2006 |                       | 3.2                | 3.10           | 1                           |          | 55                           | 2              |

Table S1 cont.

| No. | Strain (MGAS) | Year | Infection Type        | <i>emm3</i> Allele | Phage Genotype | SNP <sub>15</sub> Haplotype | Subclone | SNP <sub>280</sub> Haplotype | Clonal Complex |
|-----|---------------|------|-----------------------|--------------------|----------------|-----------------------------|----------|------------------------------|----------------|
| 318 | 15062         | 2006 | peritonitis           | 3.35               | 3.01           | 1                           | 9        | 40                           | 6              |
| 319 | 15063         | 2006 |                       | 3.1                | 3.07           | 1                           | 10       | 34                           | 8              |
| 320 | 15184         | 2006 | necrotizing fasciitis | 3.2                | 3.07           | 1                           | 8        | 71                           | 3              |
| 321 | 15064         | 2006 | necrotizing fasciitis | 3.35               | 3.01           | 1                           | 9        | 41                           | 6              |
| 322 | 15185         | 2006 | soft tissue           | 3.1                | 3.07           | 1                           | 10       | 35                           | 8              |
| 323 | 15186         | 2006 | necrotizing fasciitis | 3.1                | 3.07           | 1                           | 10       | 35                           | 8              |
| 324 | 15187         | 2007 |                       | 3.1                | 3.07           | 1                           | 10       | 35                           | 8              |
| 325 | 15188         | 2007 |                       | 3.1                | 3.07           | 1                           | 10       | 34                           | 8              |
| 326 | 15189         | 2007 | soft tissue           | 3.2                | 3.01           | 1                           | 5        | 59                           | 5              |
| 327 | 15190         | 2007 | soft tissue           | 3.1                | 3.10           | 3                           |          | 17                           | 21             |
| 328 | 15191         | 2007 | necrotizing fasciitis | 3.2                | 3.01           | 1                           | 5        | 60                           | 5              |
| 329 | 15192         | 2007 | arthritis             | 3.1                | 3.07           | 1                           | 10       | 35                           | 8              |
| 330 | 15193         | 2007 | lower respiratory     | 3.1                | 3.07           | 1                           | 10       | 34                           | 8              |
| 331 | 15194         | 2007 | necrotizing fasciitis | 3.1                | 3.01           | 1                           | 1        | 75                           | 1              |
| 332 | 15195         | 2007 |                       | 3.1                | 3.01           | 1                           | 1        | 55                           | 2              |
| 333 | 15196         | 2007 | soft tissue           | 3.1                | 3.10           | 3                           |          | 18                           | 21             |
| 334 | 15197         | 2007 | bacteremia            | 3.1                | 3.01           | 1                           | 1        | 34                           | 8              |
| 335 | 15198         | 2007 | soft tissue           | 3.1                | 3.02           | 3                           | 6        | 2                            |                |
| 336 | 15199         | 2007 |                       | 3.1                | 3.01           | 1                           | 1        | 75                           | 1              |
| 337 | 15200         | 2007 | soft tissue           | 3.35               | 3.01           | 1                           | 9        | 41                           | 6              |
| 338 | 15201         | 2007 |                       | 3.1                | 3.02           | 1                           | 6        | 2                            |                |
| 339 | 15202         | 2007 |                       | 3.1                | 3.02           | 3                           | 6        | 13                           |                |
| 340 | 15203         | 2007 | upper respiratory     | 3.33               | 3.02           | 3                           |          | 49                           |                |
| 341 | 15209         | 2007 |                       | 3.2                | 3.01           | 1                           | 5        | 59                           | 5              |
| 342 | 15210         | 2007 |                       | 3.1                | 3.02           | 3                           | 6        | 12                           | 17             |
| 343 | 15211         | 2007 |                       | 3.35               | 3.01           | 1                           | 9        | 41                           | 6              |
| 344 | 15212         | 2007 |                       | 3.2                | 3.07           | 1                           | 8        | 66                           | 3              |

**Table S2. Ontario GAS serotype M3 core single nucleotide polymorphisms.<sup>1</sup>**

| No. | Locus  | Ref | Test | CDS<br>/IG | Locus Tag | Annotation                                     | Syn<br>/Non | Ref   | Test  | Con<br>/Rad | No. of Strains |
|-----|--------|-----|------|------------|-----------|------------------------------------------------|-------------|-------|-------|-------------|----------------|
| 1   | 1823   | A   | G    | CDS        | 0002      | DNA polymerase III beta subunit                | Non         | Ile_I | Val_V | Con         | 1              |
| 2   | 7975   | C   | T    | IG         | IG        | IG                                             | --          | --    | --    | --          | 2              |
| 3   | 10114  | G   | T    | CDS        | 0009      | unknown function                               | Non         | Val_V | Phe_F | Con         | 66             |
| 4   | 12658  | G   | C    | CDS        | 0011      | Hypoxanthine-guanine phosphoribosyltransferase | Non         | Glu_E | Gln_Q | Con         | 1              |
| 5   | 12730  | T   | C    | CDS        | 0011      | Hypoxanthine-guanine phosphoribosyltransferase | Non         | Tyr_Y | His_H | Con         | 1              |
| 6   | 12845  | T   | A    | CDS        | 0012      | Cell division protein ftsH                     | Non         | Phe_F | Tyr_Y | Con         | 3              |
| 7   | 13671  | C   | T    | CDS        | 0012      | Cell division protein ftsH                     | Syn         | Asp_D | Asp_D | --          | 1              |
| 8   | 16387  | A   | G    | CDS        | 0013      | Cationic amino acid transporter                | Syn         | Leu_L | Leu_L | --          | 21             |
| 9   | 16645  | T   | G    | IG         | IG        | IG                                             | --          | --    | --    | --          | 1              |
| 10  | 28092  | T   | C    | IG         | IG        | IG                                             | --          | --    | --    | --          | 1              |
| 11  | 35953  | A   | T    | IG         | IG        | IG                                             | --          | --    | --    | --          | 20             |
| 12  | 37285  | A   | T    | CDS        | 0020      | Phosphoribosylformylglycinamide synthase       | Non         | Tyr_Y | Phe_F | Con         | 24             |
| 13  | 42490  | G   | A    | CDS        | 0022      | Phosphoribosylformylglycinamide cyclo-ligase   | Syn         | Leu_L | Leu_L | --          | 1              |
| 14  | 44364  | T   | C    | CDS        | 0024      | IMP cyclohydrolase                             | Syn         | Asn_N | Asn_N | --          | 1              |
| 15  | 45232  | G   | A    | CDS        | 0024      | IMP cyclohydrolase                             | Non         | Ala_A | Thr_T | Con         | 3              |
| 16  | 46653  | C   | A    | CDS        | 0025      | putative choline binding protein               | Non         | Ser_S | Ile_I | Rad         | 1              |
| 17  | 47892  | G   | A    | CDS        | 0026      | Phosphoribosylamine--glycine ligase            | Syn         | Lys_K | Lys_K | --          | 1              |
| 18  | 48112  | A   | C    | CDS        | 0026      | Phosphoribosylamine--glycine ligase            | Non         | Ile_I | Leu_L | Con         | 23             |
| 19  | 49430  | G   | A    | CDS        | 0028      | Phosphoribosylaminoimidazole carboxylase       | Syn         | Leu_L | Leu_L | --          | 1              |
| 20  | 61350  | G   | A    | IG         | IG        | IG                                             | --          | --    | --    | --          | 1              |
| 21  | 61529  | T   | C    | IG         | IG        | IG                                             | --          | --    | --    | --          | 1              |
| 22  | 64980  | A   | G    | IG         | IG        | IG                                             | --          | --    | --    | --          | 1              |
| 23  | 66294  | T   | G    | CDS        | 0041      | LSU ribosomal protein L4p                      | Non         | Ser_S | Ala_A | Con         | 65             |
| 24  | 67203  | C   | T    | CDS        | 0043      | LSU ribosomal protein L4p                      | Syn         | Asn_N | Asn_N | --          | 1              |
| 25  | 67875  | C   | T    | IG         | IG        | IG                                             | --          | --    | --    | --          | 1              |
| 26  | 76867  | T   | C    | CDS        | 0062      | Translation initiation factor 1                | Syn         | Ser_S | Ser_S | --          | 1              |
| 27  | 79640  | C   | T    | IG         | IG        | IG                                             | --          | --    | --    | --          | 6              |
| 28  | 85069  | T   | C    | IG         | IG        | IG                                             | --          | --    | --    | --          | 1              |
| 29  | 85868  | A   | C    | IG         | IG        | IG                                             | --          | --    | --    | --          | 1              |
| 30  | 87320  | G   | A    | CDS        | --        | 4-PP-cytidyl-2-C-methyl-D-erythritol kinase    | Non         | Val_V | Ile_I | Con         | 1              |
| 31  | 93041  | T   | C    | CDS        | 0074      | Multimodular transpeptidase-transglycosylase   | Syn         | Tyr_Y | Tyr_Y | --          | 2              |
| 32  | 98549  | A   | G    | CDS        | 0076      | DNA-directed RNA polymerase beta' subunit      | Non         | Lys_K | Glu_E | Con         | 5              |
| 33  | 106561 | G   | T    | CDS        | 0085      | Adenine-specific methyltransferase             | Non         | Ser_S | Ile_I | Rad         | 1              |
| 34  | 106604 | G   | A    | CDS        | 0085      | Adenine-specific methyltransferase             | Syn         | Gln_Q | Gln_Q | --          | 1              |
| 35  | 106671 | C   | A    | CDS        | 0085      | Adenine-specific methyltransferase             | Non         | Pro_P | Thr_T | Con         | 1              |
| 36  | 107126 | A   | G    | CDS        | 0086      | Acetate kinase                                 | Non         | Gln_Q | Arg_R | Con         | 1              |
| 37  | 113828 | C   | T    | CDS        | 0095      | tRNA dihydrouridine synthase                   | Non         | Glu_E | Lys_K | Con         | 1              |
| 38  | 116911 | G   | A    | CDS        | 0097      | Negative transcriptional regulator             | Non         | Ala_A | Val_V | Con         | 1              |
| 39  | 117327 | C   | T    | IG         | IG        | IG                                             | --          | --    | --    | --          | 1              |
| 40  | 117536 | C   | T    | IG         | IG        | IG                                             | --          | --    | --    | --          | 3              |
| 41  | 118018 | C   | T    | CDS        | 0098      | putative collagen binding protein              | Non         | Ala_A | Val_V | Con         | 11             |
| 42  | 119965 | T   | C    | CDS        | 0099      | Signal peptidase I                             | Syn         | Thr_T | Thr_T | --          | 24             |
| 43  | 122194 | C   | T    | CDS        | 0101      | NPQTN specific sortase B                       | Non         | His_H | Tyr_Y | Con         | 1              |
| 44  | 127932 | T   | A    | IG         | IG        | IG                                             | --          | --    | --    | --          | 1              |
| 45  | 130696 | T   | C    | IG         | IG        | IG                                             | --          | --    | --    | --          | 1              |
| 46  | 131210 | T   | C    | CDS        | 0108      | 3-ketoacyl-CoA thiolase                        | Non         | Ile_I | Thr_T | Con         | 9              |
| 47  | 131360 | G   | A    | CDS        | 0108      | 3-ketoacyl-CoA thiolase                        | Non         | Gly_G | Asp_D | Con         | 1              |
| 48  | 131636 | C   | T    | CDS        | 0108      | 3-ketoacyl-CoA thiolase                        | Non         | Ala_A | Val_V | Con         | 10             |
| 49  | 141908 | C   | T    | CDS        | 0120      | V-type ATP synthase subunit A                  | Non         | Thr_T | Ile_I | Con         | 1              |
| 50  | 143708 | C   | A    | CDS        | 0121      | V-type ATP synthase subunit B                  | Non         | Ala_A | Asp_D | Rad         | 1              |
| 51  | 144672 | T   | C    | CDS        | 0122      | V-type ATP synthase subunit D                  | Non         | Tyr_Y | His_H | Con         | 2              |
| 52  | 146152 | C   | T    | CDS        | 0123      | Tellurite resistance protein                   | Non         | Ala_A | Thr_T | Con         | 1              |
| 53  | 152083 | G   | A    | CDS        | 0128      | Nicotine adenine dinucleotide glycohydrolase   | Non         | Met_M | Ile_I | Con         | 1              |
| 54  | 155355 | T   | C    | IG         | IG        | IG                                             | --          | --    | --    | --          | 2              |
| 55  | 156470 | G   | A    | IG         | IG        | IG                                             | --          | --    | --    | --          | 9              |
| 56  | 157102 | G   | A    | CDS        | 0133      | Cystathionine beta-lyase                       | Non         | Ala_A | Thr_T | Con         | 1              |
| 57  | 162062 | C   | T    | CDS        | 0135      | PTS system IIC component                       | Non         | Ser_S | Phe_F | Rad         | 2              |
| 58  | 163387 | G   | A    | CDS        | 0137      | PTS system IIC component                       | Non         | Glu_E | Lys_K | Con         | 10             |
| 59  | 164253 | C   | T    | CDS        | 0139      | L-xylulose 5-phosphate 3-epimerase             | Non         | Thr_T | Ile_I | Con         | 1              |
| 60  | 166685 | C   | T    | CDS        | 0141      | unknown function                               | Syn         | Val_V | Val_V | --          | 1              |
| 61  | 169236 | A   | T    | IG         | IG        | IG                                             | --          | --    | --    | --          | 1              |
| 62  | 170064 | T   | C    | CDS        | 0143      | Glycine betaine ABC transport system           | Syn         | Asn_N | Asn_N | --          | 93             |

Table S2 cont.

| No. | Locus  | Ref | Test | CDS /IG | Locus Tag | Annotation                                    | Syn /Non | Ref   | Test  | Con /Rad | No. of Strains |
|-----|--------|-----|------|---------|-----------|-----------------------------------------------|----------|-------|-------|----------|----------------|
| 63  | 179617 | C   | T    | CDS     | 0151      | Core component BioY of biotin ECF transporter | Syn      | Tyr_Y | Tyr_Y | --       | 1              |
| 64  | 182684 | C   | T    | CDS     | 0154      | unknown function                              | Non      | Val_V | Ile_I | Con      | 1              |
| 65  | 183592 | G   | A    | CDS     | 0155      | Streptococcal pyrogenic exotoxin G (SpeG)     | Non      | Ala_A | Thr_T | Con      | 1              |
| 66  | 184244 | C   | T    | IG      | IG        | IG                                            | --       | --    | --    | --       | 1              |
| 67  | 186843 | G   | A    | CDS     | 0157      | Transcriptional regulator, RofA-like Protein  | Non      | Thr_T | Ile_I | Con      | 1              |
| 68  | 187289 | C   | T    | CDS     | 0157      | Transcriptional regulator, RofA-like Protein  | Non      | Met_M | Ile_I | Con      | 1              |
| 69  | 189525 | T   | A    | CDS     | 0160      | UTP--Glc-1-phosphate uridylyltransferase      | Syn      | Thr_T | Thr_T | --       | 1              |
| 70  | 195125 | C   | T    | CDS     | 0164      | Multidrug resistance ABC transporter          | Non      | Gln_Q | STOP  | STOP     | 5              |
| 71  | 195350 | G   | T    | CDS     | 0164      | Multidrug resistance ABC transporter          | Non      | Ala_A | Ser_S | Con      | 1              |
| 72  | 200130 | C   | T    | IG      | IG        | IG                                            | --       | --    | --    | --       | 1              |
| 73  | 201055 | G   | A    | CDS     | 0170      | Glutamyl-tRNA synthetase                      | Non      | Glu_E | Lys_K | Con      | 10             |
| 74  | 201120 | G   | A    | CDS     | 0170      | Glutamyl-tRNA synthetase                      | Syn      | Glu_E | Glu_E | --       | 1              |
| 75  | 201573 | A   | G    | CDS     | 0170      | Glutamyl-tRNA synthetase                      | Syn      | Leu_L | Leu_L | --       | 1              |
| 76  | 201820 | T   | C    | IG      | IG        | IG                                            | --       | --    | --    | --       | 1              |
| 77  | 204839 | T   | C    | CDS     | 0174      | Response regulator FasA or ComE or BlpR       | Syn      | Asp_D | Asp_D | --       | 1              |
| 78  | 205327 | C   | T    | CDS     | 0174      | Response regulator FasA or ComE or BlpR       | Non      | Ala_A | Val_V | Con      | 9              |
| 79  | 206116 | G   | T    | CDS     | 0175      | Ribonuclease P protein component              | Syn      | Val_V | Val_V | --       | 1              |
| 80  | 213285 | C   | T    | CDS     | 0184      | unknown function                              | Non      | Thr_T | Met_M | Con      | 1              |
| 81  | 218570 | C   | T    | CDS     | 0190      | Dimethyladenosine transferase                 | Non      | Pro_P | Ser_S | Con      | 1              |
| 82  | 220205 | C   | T    | CDS     | 0192      | Ribulose-phosphate 3-epimerase                | Syn      | Tyr_Y | Tyr_Y | --       | 9              |
| 83  | 221722 | C   | T    | CDS     | 0194      | DNA recombination protein RmuC                | Syn      | Asp_D | Asp_D | --       | 1              |
| 84  | 225263 | C   | T    | CDS     | 0197      | Surface exclusion protein                     | Non      | Ala_A | Val_V | Con      | 1              |
| 85  | 233903 | G   | T    | CDS     | 0203      | Amino acid ABC transporter                    | Non      | Leu_L | Ile_I | Con      | 1              |
| 86  | 235575 | C   | T    | CDS     | 0204      | unknown function                              | Non      | Thr_T | Ile_I | Con      | 1              |
| 87  | 238919 | G   | A    | CDS     | 0206      | Negative regulator of genetic competence      | Non      | Gly_G | Arg_R | Rad      | 1              |
| 88  | 239812 | C   | T    | CDS     | 0207      | Undecaprenyl-phosphate GlcNAc-1-P transferase | Syn      | Asp_D | Asp_D | --       | 1              |
| 89  | 242152 | C   | T    | CDS     | 0209      | Iron-sulfur cluster assembly protein          | Non      | Arg_R | Cys_C | Rad      | 1              |
| 90  | 242944 | A   | C    | CDS     | 0210      | Cysteine desulfurase                          | Non      | Ile_I | Leu_L | Con      | 14             |
| 91  | 243806 | C   | T    | CDS     | 0211      | Iron-sulfur cluster assembly scaffold protein | Syn      | Leu_L | Leu_L | --       | 1              |
| 92  | 245533 | G   | A    | CDS     | 0212      | Iron-sulfur cluster assembly protein          | Non      | Ser_S | Asn_N | Con      | 1              |
| 93  | 248786 | A   | G    | CDS     | 0215      | Oligopeptide transport protein oppA           | Syn      | Val_V | Val_V | --       | 1              |
| 94  | 253755 | G   | T    | CDS     | 0218      | Oligopeptide transport protein oppD           | Non      | Cys_C | Phe_F | Rad      | 1              |
| 95  | 254542 | T   | C    | CDS     | 0219      | Oligopeptide transport protein oppF           | Non      | Met_M | Thr_T | Con      | 5              |
| 96  | 255852 | C   | T    | IG      | IG        | IG                                            | --       | --    | --    | --       | 1              |
| 97  | 261079 | A   | G    | IG      | IG        | IG                                            | --       | --    | --    | --       | 6              |
| 98  | 262601 | C   | A    | IG      | IG        | IG                                            | --       | --    | --    | --       | 1              |
| 99  | 262617 | T   | C    | IG      | IG        | IG                                            | --       | --    | --    | --       | 1              |
| 100 | 262888 | C   | T    | CDS     | 0221      | putative transposase - IS1548                 | Non      | Pro_P | Ser_S | Con      | 1              |
| 101 | 264283 | C   | T    | CDS     | 0223      | Hydrolase, HAD subfamily IIIA                 | Syn      | Ala_A | Ala_A | --       | 1              |
| 102 | 276064 | T   | C    | CDS     | 0236      | Branched-chain aa transport carrier protein   | Non      | Thr_T | Ala_A | Con      | 1              |
| 103 | 277587 | A   | G    | CDS     | 0237      | Dicarboxylate/amino acid:Na+ or H+ symporter  | Syn      | Ala_A | Ala_A | --       | 3              |
| 104 | 277878 | G   | A    | CDS     | 0237      | Dicarboxylate/amino acid:Na+ or H+ symporter  | Syn      | Leu_L | Leu_L | --       | 1              |
| 105 | 283656 | A   | T    | CDS     | 0244      | TCS response regulator CovR/CsrR              | Non      | Glu_E | Val_V | Rad      | 1              |
| 106 | 283739 | G   | T    | CDS     | 0244      | TCS response regulator CovR/CsrR              | Non      | Glu_E | STOP  | STOP     | 1              |
| 107 | 283982 | C   | T    | CDS     | 0244      | TCS response regulator CovR/CsrR              | Non      | Arg_R | Cys_C | Rad      | 1              |
| 108 | 283985 | C   | T    | CDS     | 0244      | TCS response regulator CovR/CsrR              | Non      | Arg_R | Cys_C | Rad      | 1              |
| 109 | 284064 | C   | A    | CDS     | 0244      | TCS response regulator CovR/CsrR              | Non      | Ser_S | STOP  | STOP     | 1              |
| 110 | 284208 | A   | T    | CDS     | 0244      | TCS response regulator CovR/CsrR              | Non      | Asn_N | Ile_I | Rad      | 1              |
| 111 | 284369 | C   | G    | CDS     | 0245      | TCS sensor kinase CovS/CsrS                   | Non      | Pro_P | Arg_R | Rad      | 1              |
| 112 | 284434 | G   | A    | CDS     | 0245      | TCS sensor kinase CovS/CsrS                   | Non      | Ala_A | Thr_T | Con      | 1              |
| 113 | 284614 | C   | T    | CDS     | 0245      | TCS sensor kinase CovS/CsrS                   | Non      | Arg_R | STOP  | STOP     | 1              |
| 114 | 284719 | G   | T    | CDS     | 0245      | TCS sensor kinase CovS/CsrS                   | Non      | Glu_E | STOP  | STOP     | 1              |
| 115 | 284963 | C   | T    | CDS     | 0245      | TCS sensor kinase CovS/CsrS                   | Non      | Thr_T | Met_M | Con      | 1              |
| 116 | 284976 | G   | T    | CDS     | 0245      | TCS sensor kinase CovS/CsrS                   | Non      | Leu_L | Phe_F | Con      | 1              |
| 117 | 285077 | A   | G    | CDS     | 0245      | TCS sensor kinase CovS/CsrS                   | Non      | Glu_E | Gly_G | Con      | 1              |
| 118 | 285102 | G   | A    | CDS     | 0245      | TCS sensor kinase CovS/CsrS                   | Non      | Met_M | Ile_I | Con      | 1              |
| 119 | 285188 | T   | C    | CDS     | 0245      | TCS sensor kinase CovS/CsrS                   | Non      | Ile_I | Thr_T | Con      | 1              |
| 120 | 285260 | C   | T    | CDS     | 0245      | TCS sensor kinase CovS/CsrS                   | Non      | Ala_A | Val_V | Con      | 1              |
| 121 | 285653 | G   | A    | CDS     | 0245      | TCS sensor kinase CovS/CsrS                   | Non      | Arg_R | Lys_K | Con      | 1              |
| 122 | 285692 | T   | G    | CDS     | 0245      | TCS sensor kinase CovS/CsrS                   | Non      | Val_V | Gly_G | Rad      | 64             |
| 123 | 285704 | G   | A    | CDS     | 0245      | TCS sensor kinase CovS/CsrS                   | Non      | Gly_G | Asp_D | Con      | 1              |
| 124 | 290120 | C   | T    | IG      | IG        | IG                                            | --       | --    | --    | --       | 19             |
| 125 | 291438 | G   | A    | CDS     | 0250      | SWF/SNF family helicase                       | Syn      | Ser_S | Ser_S | --       | 92             |

Table S2 cont.

| No. | Locus  | Ref | Test | CDS /IG | Locus Tag | Annotation                                        | Syn /Non | Ref   | Test  | Con /Rad | No. of Strains |
|-----|--------|-----|------|---------|-----------|---------------------------------------------------|----------|-------|-------|----------|----------------|
| 126 | 293363 | G   | A    | IG      | IG        | IG                                                | --       | --    | --    | --       | 1              |
| 127 | 295278 | T   | C    | CDS     | 0252      | UDP-N-acetylmuramate--alanine ligase              | Syn      | Gly_G | Gly_G | --       | 1              |
| 128 | 304058 | C   | T    | CDS     | 0263      | Xanthosine/inosine triphosphate pyrophosphatase   | Non      | Thr_T | Ile_I | Con      | 2              |
| 129 | 309506 | G   | A    | CDS     | 0271      | tRNA (cytosine34-2'-O-)-methyltransferase         | Syn      | Gln_Q | Gln_Q | --       | 1              |
| 130 | 312102 | G   | A    | CDS     | 0274      | Fe-S OXIDOREDUCTASE                               | Non      | Ser_S | Asn_N | Con      | 1              |
| 131 | 312174 | T   | A    | CDS     | 0274      | Fe-S OXIDOREDUCTASE                               | Non      | Ile_I | Asn_N | Rad      | 1              |
| 132 | 313068 | A   | T    | CDS     | 0276      | unknown function                                  | Non      | Leu_L | Phe_F | Con      | 1              |
| 133 | 317708 | G   | A    | CDS     | 0280      | Ferrichrome transport protein                     | Non      | Pro_P | Ser_S | Con      | 5              |
| 134 | 317815 | G   | A    | CDS     | 0280      | Ferrichrome transport protein                     | Non      | Pro_p | Leu_L | Con      | 1              |
| 135 | 319262 | G   | A    | CDS     | 0282      | Ferrichrome-binding periplasmic protein           | Syn      | Leu_L | Leu_L | --       | 2              |
| 136 | 320910 | C   | T    | IG      | IG        | IG                                                | --       | --    | --    | --       | 1              |
| 137 | 321832 | C   | A    | CDS     | 0284      | UDP-MurNAc-D-Glu--2,6-diaminopimelate ligase      | Non      | Arg_R | Ile_I | Con      | 6              |
| 138 | 324785 | C   | G    | CDS     | 0286      | Uracil phosphoribosyltransferase                  | Non      | Pro_P | Ala_A | Con      | 1              |
| 139 | 326376 | A   | C    | CDS     | 0288      | unknown function                                  | Non      | Lys_K | Asn_N | Con      | 1              |
| 140 | 329015 | C   | T    | IG      | IG        | IG                                                | --       | --    | --    | --       | 1              |
| 141 | 334609 | G   | A    | CDS     | 0298      | Serine endopeptidase ScpC                         | Syn      | Val_V | Val_V | --       | 1              |
| 142 | 337817 | G   | A    | CDS     | 0298      | Serine endopeptidase ScpC                         | Non      | Asp_D | Asn_N | Con      | 1              |
| 143 | 345191 | G   | A    | CDS     | 0302      | Ribonucleotide reduction protein NrdI             | Non      | Asp_D | Asn_N | Con      | 4              |
| 144 | 345575 | A   | G    | CDS     | 0303      | Ribonucleotide reductase of class Ib              | Non      | Gln_Q | Arg_R | Con      | 2              |
| 145 | 350013 | C   | A    | CDS     | 0307      | unknown function                                  | Non      | Glu_E | STOP  | STOP     | 1              |
| 146 | 353069 | G   | A    | CDS     | 0311      | Phosphoglycerate transporter protein              | Non      | Val_V | Ile_I | Con      | 1              |
| 147 | 354889 | C   | T    | CDS     | 0312      | GlcNAc-1-phosphate uridylyltransferase            | Non      | Ala_A | Val_V | Con      | 1              |
| 148 | 355502 | C   | T    | CDS     | 0312      | GlcNAc-1-phosphate uridylyltransferase            | Syn      | Ala_A | Ala_A | --       | 2              |
| 149 | 357387 | A   | G    | CDS     | 0315      | 5'-methylthioadenosine nucleosidase               | Non      | Ile_I | Val_V | Con      | 2              |
| 150 | 358653 | A   | T    | CDS     | 0317      | Metal transporter of streptococcus regulator MtsR | Non      | Ile_I | Asn_N | Rad      | 1              |
| 151 | 362477 | C   | T    | IG      | IG        | IG                                                | --       | --    | --    | --       | 1              |
| 152 | 363501 | G   | A    | CDS     | 0322      | Cell division protein ftsK                        | Non      | Glu_E | Lys_K | Con      | 1              |
| 153 | 364945 | C   | T    | CDS     | 0322      | Cell division protein ftsK                        | Non      | Ala_A | Val_V | Con      | 13             |
| 154 | 366105 | C   | T    | IG      | IG        | IG                                                | --       | --    | --    | --       | 1              |
| 155 | 371078 | C   | T    | CDS     | 0331      | streptococcal surface immunogenic protein         | Non      | Pro_P | Ser_S | Con      | 1              |
| 156 | 371608 | A   | T    | IG      | IG        | IG                                                | --       | --    | --    | --       | 1              |
| 157 | 372240 | A   | C    | CDS     | 0332      | 67kDa Myosin-crossreactive streptococcal antigen  | Non      | Glu_E | Asp_D | Con      | 1              |
| 158 | 373426 | G   | A    | CDS     | 0332      | 67kDa Myosin-crossreactive streptococcal antigen  | Non      | Val_V | Ile_I | Con      | 1              |
| 159 | 381581 | G   | T    | IG      | IG        | IG                                                | --       | --    | --    | --       | 10             |
| 160 | 385465 | T   | A    | CDS     | 0346      | Positive transcriptional regulator, MutR family   | Non      | Asn_N | Lys_K | Con      | 1              |
| 161 | 390841 | T   | A    | IG      | IG        | IG                                                | --       | --    | --    | --       | 1              |
| 162 | 393294 | G   | T    | CDS     | 0353      | SsrA-binding protein                              | Non      | Ala_A | Ser_S | Con      | 14             |
| 163 | 393323 | C   | T    | CDS     | 0353      | SsrA-binding protein                              | Syn      | Thr_T | Thr_T | --       | 1              |
| 164 | 393741 | C   | T    | CDS     | 0354      | Glutaminy-peptide cyclotransferase                | Non      | Thr_T | Ile_I | Con      | 2              |
| 165 | 394857 | C   | A    | CDS     | 0355      | Pyrrolidone-carboxylate peptidase                 | Non      | Ala_A | Ser_S | Con      | 1              |
| 166 | 397063 | G   | A    | IG      | IG        | IG                                                | --       | --    | --    | --       | 1              |
| 167 | 398051 | C   | T    | IG      | IG        | IG                                                | --       | --    | --    | --       | 1              |
| 168 | 398305 | G   | A    | CDS     | 0359      | Lactoylglycyltransferase                          | Syn      | Ala_A | Ala_A | --       | 1              |
| 169 | 398983 | A   | G    | CDS     | 0360      | Oxygen-insensitive NAD(P)H nitroreductase         | Non      | Tyr_Y | His_H | Con      | 1              |
| 170 | 399627 | C   | G    | CDS     | 0361      | Xaa-Pro dipeptidase                               | Non      | Gly_G | Ala_A | Con      | 1              |
| 171 | 406412 | C   | A    | IG      | IG        | IG                                                | --       | --    | --    | --       | 1              |
| 172 | 409052 | C   | T    | CDS     | 0368      | Multidrug transport system, permease component    | Syn      | Leu_L | Leu_L | --       | 5              |
| 173 | 409500 | T   | C    | IG      | IG        | IG                                                | --       | --    | --    | --       | 1              |
| 174 | 409569 | G   | A    | IG      | IG        | IG                                                | --       | --    | --    | --       | 1              |
| 175 | 413668 | G   | A    | CDS     | 0372      | Two-component response regulator                  | Syn      | Ser_S | Ser_S | --       | 1              |
| 176 | 420072 | T   | C    | CDS     | 0376      | Chromosome partition protein smc                  | Syn      | Ala_A | Ala_A | --       | 1              |
| 177 | 425600 | G   | T    | CDS     | 0381      | unknown function                                  | Non      | Lys_K | Asn_N | Con      | 1              |
| 178 | 426890 | T   | C    | CDS     | 0382      | Archaeal S-adenosylmethionine synthetase          | Syn      | Ile_I | Ile_I | --       | 1              |
| 179 | 427769 | G   | A    | CDS     | 0383      | unknown function                                  | Non      | Gly_G | Glu_E | Con      | 3              |
| 180 | 429521 | G   | A    | CDS     | --        | unknown function                                  | Syn      | Lys_K | Lys_K | --       | 1              |
| 181 | 430539 | A   | G    | CDS     | 0385      | UDP-glucose dehydrogenase                         | Non      | Asn_N | Ser_S | Con      | 1              |
| 182 | 432907 | C   | T    | CDS     | 0389      | unknown function                                  | Non      | Ala_A | Thr_T | Con      | 1              |
| 183 | 433519 | C   | T    | CDS     | 0389      | unknown function                                  | Non      | Asp_D | Asn_N | Con      | 10             |
| 184 | 437736 | C   | T    | CDS     | 0397      | Transposase TnpA                                  | Non      | Cys_C | Tyr_Y | Rad      | 1              |
| 185 | 438447 | C   | T    | CDS     | 0397      | Transposase TnpA                                  | Non      | Cys_C | Tyr_Y | Rad      | 1              |
| 186 | 438462 | G   | A    | IG      | IG        | IG                                                | --       | --    | --    | --       | 1              |
| 187 | 439866 | G   | A    | CDS     | 0399      | Hydrolase (HAD superfamily)                       | Non      | Gly_G | Glu_E | Con      | 2              |
| 188 | 440859 | C   | T    | CDS     | 0401      | SRP receptor protein FtsY                         | Syn      | Asp_D | Asp_D | --       | 1              |

Table S2 cont.

| No. | Locus  | Ref | Test | CDS /IG | Locus Tag | Annotation                                           | Syn /Non | Ref   | Test  | Con /Rad | No. of Strains |
|-----|--------|-----|------|---------|-----------|------------------------------------------------------|----------|-------|-------|----------|----------------|
| 189 | 442045 | A   | C    | CDS     | 0401      | SRP receptor protein FtsY                            | Non      | Ser_S | Arg_R | Rad      | 15             |
| 190 | 447750 | C   | T    | CDS     | 0405      | 6-P-beta-glucosidase                                 | Syn      | Asp_D | Asp_D | --       | 1              |
| 191 | 447822 | T   | C    | CDS     | 0405      | 6-P-beta-glucosidase                                 | Syn      | Asn_N | Asn_N | --       | 4              |
| 192 | 448608 | C   | T    | CDS     | 0406      | ABC transporter, substrate-binding protein           | Syn      | Pro_P | Pro_P | --       | 1              |
| 193 | 453672 | G   | A    | IG      | IG        | IG                                                   | --       | --    | --    | --       | 1              |
| 194 | 455064 | C   | T    | CDS     | 0413      | Prolipoprotein diacylglycerol transferase            | Non      | Ala_A | Val_V | Con      | 92             |
| 195 | 458239 | C   | T    | CDS     | 0418      | peptidase, U32 family large subunit                  | Syn      | Gly_G | Gly_G | --       | 3              |
| 196 | 465455 | C   | A    | CDS     | 0425      | Phage lysin glycosyl hydrolase                       | Non      | Ala_A | Ser_S | Con      | 1              |
| 197 | 467972 | T   | G    | CDS     | 0429      | Oligoendopeptidase F                                 | Syn      | Ala_A | Ala_A | --       | 5              |
| 198 | 468760 | C   | A    | CDS     | 0429      | Oligoendopeptidase F                                 | Non      | Ala_A | Ser_S | Con      | 1              |
| 199 | 468848 | G   | C    | CDS     | 0429      | Oligoendopeptidase F                                 | Syn      | Ala_A | Ala_A | --       | 5              |
| 200 | 470370 | G   | A    | CDS     | 0430      | Phosphoenolpyruvate carboxylase                      | Non      | Gly_G | Asp_D | Con      | 6              |
| 201 | 472699 | C   | T    | CDS     | 0431      | Cell division protein ftsW                           | Non      | Thr_T | Ile_I | Con      | 2              |
| 202 | 476851 | C   | T    | CDS     | 0434      | MurN protein                                         | Non      | Val_V | Met_M | Con      | 1              |
| 203 | 477854 | T   | C    | CDS     | 0435      | PG serine/alanine adding enzyme                      | Non      | Thr_T | Ala_A | Con      | 62             |
| 204 | 481574 | T   | C    | IG      | IG        | IG                                                   | --       | --    | --    | --       | 1              |
| 205 | 484867 | G   | A    | CDS     | 0440      | Calcium-transporting ATPase                          | Non      | Val_V | Ile_I | Con      | 6              |
| 206 | 485738 | C   | T    | CDS     | 0441      | Transcriptional regulator, LacI family               | Non      | Ala_A | Thr_T | Con      | 1              |
| 207 | 491836 | A   | G    | IG      | IG        | IG                                                   | --       | --    | --    | --       | 20             |
| 208 | 491954 | G   | T    | IG      | IG        | IG                                                   | --       | --    | --    | --       | 1              |
| 209 | 492838 | G   | A    | CDS     | 0448      | 2-deoxy-D-gluconate 3-dehydrogenase                  | Syn      | Gly_G | Gly_G | --       | 1              |
| 210 | 493581 | C   | T    | CDS     | 0449      | Gal-6-P isomerase LacB subunit                       | Non      | Pro_P | Leu_L | Con      | 1              |
| 211 | 493657 | T   | C    | CDS     | 0450      | 2-dehydro-3-deoxygluconate kinase                    | Non      | Phe_F | Ser_S | Rad      | 1              |
| 212 | 494333 | G   | A    | CDS     | 0450      | 2-dehydro-3-deoxygluconate kinase                    | Syn      | Gln_Q | Gln_Q | --       | 6              |
| 213 | 495679 | C   | T    | CDS     | 0452      | Beta-phosphoglucomutase                              | Non      | Thr_T | Ile_I | Con      | 1              |
| 214 | 501388 | A   | T    | CDS     | 0457      | Hydroxyacylglutathione hydrolase                     | Non      | Ser_S | Thr_T | Con      | 2              |
| 215 | 503347 | A   | T    | CDS     | 0459      | DinG family ATP-dependent helicase YoaA              | Non      | Tyr_Y | Phe_F | Con      | 5              |
| 216 | 504376 | C   | A    | CDS     | 0459      | DinG family ATP-dependent helicase YoaA              | Non      | Pro_P | His_H | Con      | 1              |
| 217 | 505864 | C   | T    | CDS     | 0460      | Aspartate aminotransferase                           | Non      | Thr_T | Ile_I | Con      | 1              |
| 218 | 506901 | G   | T    | CDS     | 0460      | Aspartate aminotransferase                           | Non      | Ala_A | Ser_S | Con      | 1              |
| 219 | 509549 | C   | T    | CDS     | 0462      | unknown function                                     | Non      | Ala_A | Val_V | Con      | 6              |
| 220 | 512693 | A   | G    | CDS     | 0465      | Dipeptidase                                          | Non      | Thr_T | Ala_A | Con      | 23             |
| 221 | 513888 | G   | A    | CDS     | 0466      | Candidate zinc-binding lipoprotein ZinT              | Non      | Val_V | Ile_I | Con      | 1              |
| 222 | 515097 | G   | C    | CDS     | 0467      | Transcriptional regulator, GntR family               | Non      | Glu_E | Gln_Q | Con      | 1              |
| 223 | 520800 | A   | G    | IG      | IG        | IG                                                   | --       | --    | --    | --       | 3              |
| 224 | 524342 | G   | A    | CDS     | 0476      | DNA gyrase subunit B                                 | Syn      | Lys_K | Lys_K | --       | 1              |
| 225 | 530558 | C   | T    | CDS     | 0481      | Streptolysin S biosynthesis protein B (SagB)         | Syn      | Tyr_Y | Tyr_Y | --       | 1              |
| 226 | 530719 | C   | T    | CDS     | 0481      | Streptolysin S biosynthesis protein B (SagB)         | Non      | Thr_T | Ile_I | Con      | 1              |
| 227 | 531205 | G   | A    | CDS     | 0482      | Streptolysin S biosynthesis protein C (SagC)         | Non      | Met_M | Ile_I | Con      | 1              |
| 228 | 539377 | T   | C    | CDS     | 0489      | Endonuclease/Exonuclease/phosphatase                 | Syn      | Val_V | Val_V | --       | 1              |
| 229 | 540894 | A   | G    | CDS     | 0489      | Endonuclease/Exonuclease/phosphatase                 | Non      | His_H | Arg_R | Con      | 3              |
| 230 | 541819 | T   | G    | CDS     | 0490      | predicted queuosine-regulated ECF transporter        | Non      | Ile_I | Ser_S | Rad      | 2              |
| 231 | 543888 | G   | A    | CDS     | 0491      | DNA ligase                                           | Non      | Gly_G | Asp_D | Con      | 1              |
| 232 | 546139 | G   | A    | CDS     | 0494      | ATP synthase A chain                                 | Non      | Met_M | Ile_I | Con      | 1              |
| 233 | 547021 | G   | C    | CDS     | 0496      | ATP synthase delta chain                             | Non      | Gly_G | Ala_A | Con      | 70             |
| 234 | 553152 | T   | C    | CDS     | 0502      | UDP-GlcNAc 1-carboxyvinyltransferase                 | Syn      | Gly_G | Gly_G | --       | 5              |
| 235 | 557039 | G   | A    | CDS     | 0507      | Phenylalanyl-tRNA synthetase beta chain              | Syn      | Ser_S | Ser_S | --       | 1              |
| 236 | 560370 | C   | T    | CDS     | 0510      | ABC transporter permease protein                     | Non      | Ala_A | Val_V | Con      | 1              |
| 237 | 561889 | C   | T    | CDS     | 0512      | Neutral zinc metallopeptidase family                 | Syn      | Leu_L | Leu_L | --       | 1              |
| 238 | 562452 | C   | T    | IG      | IG        | IG                                                   | --       | --    | --    | --       | 1              |
| 239 | 569809 | C   | T    | CDS     | 0515      | Amino acid ABC transporter                           | Non      | Pro_P | Leu_L | Con      | 1              |
| 240 | 570302 | T   | C    | CDS     | 0515      | Amino acid ABC transporter                           | Syn      | Asp_D | Asp_D | --       | 1              |
| 241 | 571094 | C   | T    | CDS     | 0517      | Large-conductance mechanosensitive channel           | Non      | Gly_G | Ser_S | Con      | 1              |
| 242 | 571553 | C   | T    | CDS     | 0518      | DNA primase                                          | Syn      | Leu_L | Leu_L | --       | 2              |
| 243 | 573336 | A   | C    | CDS     | 0519      | RNA polymerase sigma factor RpoD                     | Non      | Asp_D | Ala_A | Rad      | 1              |
| 244 | 577347 | C   | T    | CDS     | 0523      | Alpha-L-Rha alpha-1,3-L-rhamnosyltransferase         | Syn      | Asp_D | Asp_D | --       | 1              |
| 245 | 579033 | T   | C    | CDS     | 0525      | ABC-transporter                                      | Non      | Ile_I | Thr_T | Con      | 1              |
| 246 | 580636 | G   | C    | CDS     | 0526      | putative glycosyltransferase                         | Syn      | Ser_S | Ser_S | --       | 1              |
| 247 | 585698 | A   | G    | CDS     | 0529      | Glycosyltransferase involved in cell wall biogenesis | Non      | Gln_Q | Arg_R | Con      | 1              |
| 248 | 589433 | G   | A    | IG      | IG        | IG                                                   | --       | --    | --    | --       | 1              |
| 249 | 597031 | C   | T    | CDS     | 0542      | Methyltransferase                                    | Non      | Thr_T | Ile_I | Con      | 1              |
| 250 | 597618 | T   | G    | CDS     | 0542      | Methyltransferase                                    | Non      | Ser_S | Ala_A | Con      | 2              |
| 251 | 606726 | T   | C    | CDS     | 0551      | Capsule biosynthesis protein capA                    | Syn      | Leu_L | Leu_L | --       | 11             |

Table S2 cont.

| No. | Locus  | Ref | Test | CDS /IG | Locus Tag | Annotation                                    | Syn /Non | Ref   | Test  | Con /Rad | No. of Strains |
|-----|--------|-----|------|---------|-----------|-----------------------------------------------|----------|-------|-------|----------|----------------|
| 252 | 611831 | G   | C    | CDS     | 0558      | Uracil phosphoribosyltransferase              | Syn      | Leu_L | Leu_L | --       | 1              |
| 253 | 612785 | G   | A    | CDS     | 0559      | Uracil permease                               | Syn      | Val_V | Val_V | --       | 3              |
| 254 | 614402 | T   | C    | IG      | IG        | IG                                            | --       | --    | --    | --       | 16             |
| 255 | 615671 | G   | C    | IG      | IG        | IG                                            | --       | --    | --    | --       | 3              |
| 256 | 618026 | T   | A    | CDS     | 0562      | Carbamoyl-phosphate synthase large chain      | Non      | Asp_D | Glu_E | Con      | 41             |
| 257 | 625921 | T   | C    | CDS     | 0569      | Cell surface protein                          | Syn      | His_H | His_H | --       | 2              |
| 258 | 626474 | A   | G    | CDS     | 0569      | Cell surface protein                          | Non      | Thr_T | Ala_A | Con      | 18             |
| 259 | 627910 | A   | G    | CDS     | 0569      | Cell surface protein                          | Syn      | Ala_A | Ala_A | --       | 1              |
| 260 | 629448 | G   | A    | IG      | IG        | IG                                            | --       | --    | --    | --       | 1              |
| 261 | 629450 | G   | A    | IG      | IG        | IG                                            | --       | --    | --    | --       | 1              |
| 262 | 629459 | A   | G    | IG      | IG        | IG                                            | --       | --    | --    | --       | 1              |
| 263 | 629785 | G   | A    | CDS     | 0571      | Cobalt-zinc-cadmium resistance protein czcD   | Non      | His_H | Tyr_Y | Con      | 4              |
| 264 | 637987 | A   | G    | CDS     | 0580      | PTS system, fructose-specific IIA component   | Non      | Ile_I | Val_V | Con      | 1              |
| 265 | 638853 | C   | T    | CDS     | 0580      | PTS system, fructose-specific IIA component   | Syn      | Gly_G | Gly_G | --       | 1              |
| 266 | 640536 | A   | G    | CDS     | 0582      | Peptidoglycan hydrolase, Autolysin2           | Syn      | Glu_E | Glu_E | --       | 2              |
| 267 | 644431 | T   | A    | CDS     | 0586      | DegV family protein                           | Non      | Tyr_Y | Asn_N | Rad      | 1              |
| 268 | 650988 | A   | G    | CDS     | 0591      | 5'-nucleotidase                               | Syn      | Val_V | Val_V | --       | 24             |
| 269 | 651247 | C   | A    | CDS     | 0591      | 5'-nucleotidase                               | Non      | Gly_G | Val_V | Rad      | 1              |
| 270 | 655514 | C   | T    | CDS     | 0595      | Mevalonate kinase                             | Syn      | Ile_I | Ile_I | --       | 1              |
| 271 | 660832 | T   | C    | CDS     | 0600      | Hydroxymethylglutaryl-CoA synthase            | Non      | Asp_D | Gly_G | Con      | 23             |
| 272 | 665402 | G   | T    | CDS     | 0606      | unknown function                              | Non      | Trp_W | Cys_C | Rad      | 1              |
| 273 | 672424 | C   | T    | CDS     | 0612      | Purine nucleoside phosphorylase               | Non      | Ser_S | Phe_F | Rad      | 1              |
| 274 | 677902 | T   | C    | CDS     | 0618      | 6-aminohexanoate-cyclic-dimer hydrolase       | Syn      | His_H | His_H | --       | 1              |
| 275 | 678501 | A   | G    | CDS     | 0618      | 6-aminohexanoate-cyclic-dimer hydrolase       | Non      | Asp_D | Gly_G | Con      | 1              |
| 276 | 680903 | T   | C    | CDS     | 0621      | Uracil-DNA glycosylase                        | Syn      | Thr_T | Thr_T | --       | 1              |
| 277 | 682514 | A   | G    | CDS     | 0622      | Dihydroorotase                                | Non      | Thr_T | Ala_A | Con      | 1              |
| 278 | 685931 | A   | G    | CDS     | 0625      | Topoisomerase                                 | Non      | Asp_D | Gly_G | Con      | 1              |
| 279 | 686415 | C   | T    | CDS     | 0625      | Topoisomerase                                 | Syn      | Ile_I | Ile_I | --       | 1              |
| 280 | 690093 | G   | A    | CDS     | 0628      | SSU ribosomal protein S1p                     | Non      | Val_V | Ile_I | Con      | 2              |
| 281 | 692292 | C   | T    | CDS     | 0630      | Rhodanese-related sulfurtransferases          | Non      | Ser_S | Leu_L | Rad      | 11             |
| 282 | 700559 | C   | T    | CDS     | 0639      | Single-stranded-DNA-specific exonuclease recJ | Syn      | Ala_A | Ala_A | --       | 1              |
| 283 | 701833 | C   | T    | CDS     | 0639      | Single-stranded-DNA-specific exonuclease recJ | Non      | Thr_T | Ile_I | Con      | 2              |
| 284 | 703184 | C   | T    | CDS     | 0641      | DNA replication protein dnaD                  | Non      | Thr_T | Ile_I | Con      | 1              |
| 285 | 705471 | C   | A    | CDS     | 0644      | unknown function                              | Non      | Gln_Q | Lys_K | Con      | 20             |
| 286 | 710274 | C   | T    | CDS     | 0649      | Mutator mutT protein                          | Non      | Arg_R | Cys_C | Rad      | 13             |
| 287 | 712833 | T   | C    | IG      | IG        | IG                                            | --       | --    | --    | --       | 1              |
| 288 | 712926 | A   | G    | CDS     | 0652      | Fibronectin/fibrinogen-binding protein        | Non      | Val_V | Ala_A | Con      | 1              |
| 289 | 714894 | A   | G    | CDS     | 0653      | ABC transporter substrate-binding protein     | Syn      | Lys_K | Lys_K | --       | 2              |
| 290 | 716905 | C   | T    | CDS     | 0655      | ABC transporter permease protein              | Non      | Thr_T | Ile_I | Con      | 1              |
| 291 | 719266 | G   | C    | CDS     | 0657      | Zn-dependent hydrolase                        | Non      | Val_V | Leu_L | Con      | 1              |
| 292 | 720812 | T   | C    | CDS     | 0659      | unknown function                              | Syn      | Asp_D | Asp_D | --       | 1              |
| 293 | 722755 | C   | T    | CDS     | 0660      | ABC transporter ATP-binding protein           | Non      | Thr_T | Ile_I | Con      | 1              |
| 294 | 723656 | G   | T    | CDS     | 0661      | Acetoin dehydrogenase                         | Non      | Ala_A | Ser_S | Con      | 10             |
| 295 | 724702 | C   | T    | CDS     | 0662      | Acetoin dehydrogenase                         | Non      | Ala_A | Val_V | Con      | 67             |
| 296 | 725529 | C   | T    | CDS     | 0663      | Dihydroliipoamide acetyltransferase           | Syn      | Thr_T | Thr_T | --       | 1              |
| 297 | 727093 | G   | A    | CDS     | --        | unknown function                              | Non      | Arg_R | STOP  | STOP     | 15             |
| 298 | 728929 | C   | A    | CDS     | 0664      | Dihydroliipoamide dehydrogenase               | Non      | Pro_P | Thr_T | Con      | 1              |
| 299 | 729009 | G   | A    | IG      | IG        | IG                                            | --       | --    | --    | --       | 1              |
| 300 | 735618 | A   | T    | CDS     | 0669      | ABC transporter, permease protein             | Syn      | Ala_A | Ala_A | --       | 3              |
| 301 | 737189 | G   | A    | CDS     | 0670      | unknown function                              | Syn      | Pro_P | Pro_P | --       | 1              |
| 302 | 740997 | T   | A    | CDS     | 0674      | Acyl-ACP thioesterase                         | Syn      | Pro_P | Pro_P | --       | 1              |
| 303 | 741001 | A   | G    | CDS     | 0674      | Acyl-ACP thioesterase                         | Non      | Lys_K | Glu_E | Con      | 1              |
| 304 | 741281 | T   | C    | CDS     | 0674      | Acyl-ACP thioesterase                         | Non      | Ile_I | Thr_T | Con      | 1              |
| 305 | 743034 | A   | G    | IG      | IG        | IG                                            | --       | --    | --    | --       | 1              |
| 306 | 748981 | C   | A    | CDS     | 0680      | unknown function                              | Non      | Phe_F | Leu_L | Con      | 3              |
| 307 | 749005 | A   | T    | IG      | IG        | IG                                            | --       | --    | --    | --       | 1              |
| 308 | 789053 | C   | T    | IG      | IG        | IG                                            | --       | --    | --    | --       | 1              |
| 309 | 790332 | A   | G    | CDS     | 0737      | Translation elongation factor LepA            | Syn      | Gln_Q | Gln_Q | --       | 1              |
| 310 | 790681 | G   | C    | CDS     | 0737      | Translation elongation factor LepA            | Non      | Ala_A | Pro_P | Con      | 1              |
| 311 | 791207 | A   | T    | IG      | IG        | IG                                            | --       | --    | --    | --       | 1              |
| 312 | 791209 | C   | T    | IG      | IG        | IG                                            | --       | --    | --    | --       | 1              |
| 313 | 791498 | C   | A    | CDS     | 0738      | collagen-like protein SclB                    | Non      | Ala_A | Glu_E | Rad      | 2              |
| 314 | 791510 | G   | A    | CDS     | 0738      | collagen-like protein SclB                    | Non      | Gly_G | Glu_E | Con      | 1              |

Table S2 cont.

| No. | Locus  | Ref | Test | CDS /IG | Locus Tag | Annotation                                    | Syn /Non | Ref   | Test  | Con /Rad | No. of Strains |
|-----|--------|-----|------|---------|-----------|-----------------------------------------------|----------|-------|-------|----------|----------------|
| 315 | 791567 | A   | G    | CDS     | 0738      | collagen-like protein SclB                    | Non      | Asp_D | Gly_G | Con      | 1              |
| 316 | 791623 | A   | G    | CDS     | 0738      | collagen-like protein SclB                    | Non      | Lys_K | Glu_E | Con      | 2              |
| 317 | 798474 | T   | C    | CDS     | 0745      | Two-component sensor kinase YesM              | Syn      | Gly_G | Gly_G | --       | 2              |
| 318 | 801392 | T   | C    | CDS     | 0748      | Succinate-semialdehyde dehydrogenase [NAD]    | Non      | Leu_L | Ser_S | Rad      | 1              |
| 319 | 801548 | T   | C    | CDS     | 0748      | Succinate-semialdehyde dehydrogenase [NAD]    | Non      | Leu_L | Pro_P | Con      | 1              |
| 320 | 801965 | C   | T    | CDS     | 0748      | Succinate-semialdehyde dehydrogenase [NAD]    | Non      | Ala_A | Val_V | Con      | 1              |
| 321 | 806701 | T   | C    | CDS     | 0751      | Xaa-His dipeptidase                           | Syn      | Asp_D | Asp_D | --       | 1              |
| 322 | 806863 | G   | A    | CDS     | 0751      | Xaa-His dipeptidase                           | Syn      | Glu_E | Glu_E | --       | 1              |
| 323 | 806899 | T   | C    | CDS     | 0751      | Xaa-His dipeptidase                           | Syn      | Ala_A | Ala_A | --       | 1              |
| 324 | 807058 | G   | A    | CDS     | 0752      | GTPase and tRNA-U34 5-formylation enzyme      | Non      | Ala_A | Val_V | Con      | 1              |
| 325 | 809931 | G   | T    | CDS     | 0755      | D-alanyl-D-alanine carboxypeptidase           | Syn      | Gly_G | Gly_G | --       | 1              |
| 326 | 815182 | G   | T    | CDS     | 0760      | Dihydropteroate synthase                      | Non      | Asp_D | Tyr_Y | Rad      | 1              |
| 327 | 816115 | G   | A    | IG      | IG        | IG                                            | --       | --    | --    | --       | 1              |
| 328 | 816196 | T   | C    | IG      | IG        | IG                                            | --       | --    | --    | --       | 1              |
| 329 | 817265 | C   | T    | CDS     | 0764      | Spermidine Putrescine transport               | Non      | Leu_L | Phe_F | Con      | 1              |
| 330 | 822556 | C   | T    | CDS     | 0769      | Two-component sensor histidine kinase         | Syn      | Glu_E | Glu_E | --       | 1              |
| 331 | 823184 | T   | G    | CDS     | 0769      | Two-component sensor histidine kinase         | Non      | Lys_K | Thr_T | Con      | 1              |
| 332 | 825681 | T   | C    | CDS     | 0771      | NAD-dependent malic enzyme                    | Non      | Phe_F | Ser_S | Rad      | 1              |
| 333 | 830478 | C   | T    | IG      | IG        | IG                                            | --       | --    | --    | --       | 1              |
| 334 | 832287 | G   | T    | CDS     | 0777      | DNA repair protein RadC                       | Non      | Arg_R | Ile_I | Con      | 1              |
| 335 | 832888 | A   | T    | CDS     | 0778      | Glutamine amidotransferase                    | Non      | Leu_L | STOP  | STOP     | 16             |
| 336 | 840698 | T   | G    | CDS     | 0787      | Phosphate acetyltransferase                   | Non      | Ile_I | Met_M | Con      | 1              |
| 337 | 841828 | T   | C    | CDS     | 0790      | Na+ driven multidrug efflux pump              | Non      | Ile_I | Val_V | Con      | 1              |
| 338 | 842041 | G   | T    | CDS     | 0790      | Na+ driven multidrug efflux pump              | Non      | Arg_R | Ser_S | Rad      | 1              |
| 339 | 844336 | T   | G    | CDS     | 0792      | ABC transporter protein proX                  | Non      | Ser_S | Arg_R | Rad      | 1              |
| 340 | 846951 | A   | C    | CDS     | 0794      | Xanthine phosphoribosyltransferase            | Syn      | Ala_A | Ala_A | --       | 2              |
| 341 | 849465 | G   | A    | CDS     | 0796      | unknown function                              | Syn      | Asn_N | Asn_N | --       | 1              |
| 342 | 850454 | C   | T    | CDS     | 0798      | Thymidine kinase                              | Syn      | Asn_N | Asn_N | --       | 8              |
| 343 | 850721 | C   | T    | CDS     | 0799      | Peptide chain release factor 1                | Non      | Thr_T | Ile_I | Con      | 4              |
| 344 | 853669 | G   | A    | CDS     | 0803      | Serine hydroxymethyltransferase               | Non      | Ala_A | Thr_T | Con      | 6              |
| 345 | 853735 | G   | A    | CDS     | 0803      | Serine hydroxymethyltransferase               | Non      | Gly_G | Arg_R | Rad      | 1              |
| 346 | 855352 | C   | T    | CDS     | 0804      | Pseudouridylyl synthases, 23S RNA-specific    | Non      | Gln_Q | STOP  | STOP     | 1              |
| 347 | 855603 | T   | A    | CDS     | 0804      | Pseudouridylyl synthases, 23S RNA-specific    | Non      | Asp_D | Glu_E | Con      | 1              |
| 348 | 859856 | G   | T    | IG      | IG        | IG                                            | --       | --    | --    | --       | 1              |
| 349 | 860866 | G   | A    | CDS     | 0808      | NADH oxidase H2O-forming                      | Non      | Gly_G | Ser_S | Con      | 1              |
| 350 | 870839 | C   | T    | CDS     | 0818      | Ribonuclease HII                              | Syn      | Gly_G | Gly_G | --       | 1              |
| 351 | 872144 | G   | A    | CDS     | 0819      | Rossmann fold nt-binding protein Smf          | Non      | Gly_G | Glu_E | Con      | 1              |
| 352 | 872275 | G   | T    | CDS     | 0819      | Rossmann fold nt-binding protein Smf          | Non      | Gly_G | Cys_C | Rad      | 2              |
| 353 | 872314 | C   | T    | CDS     | 0819      | Rossmann fold nt-binding protein Smf          | Non      | Arg_R | STOP  | STOP     | 1              |
| 354 | 874111 | G   | C    | CDS     | 0820      | DNA topoisomerase I                           | Non      | Val_V | Leu_L | Con      | 1              |
| 355 | 874336 | C   | T    | CDS     | 0820      | DNA topoisomerase I                           | Non      | His_H | Tyr_Y | Con      | 1              |
| 356 | 876852 | A   | G    | CDS     | 0822      | Oxaloacetate decarboxylase                    | Non      | Asp_D | Gly_G | Con      | 1              |
| 357 | 881273 | G   | A    | CDS     | 0827      | Transcriptional regulator, GntR family        | Non      | Pro_P | Leu_L | Con      | 5              |
| 358 | 883268 | C   | A    | IG      | IG        | IG                                            | --       | --    | --    | --       | 1              |
| 359 | 884070 | C   | A    | IG      | IG        | IG                                            | --       | --    | --    | --       | 1              |
| 360 | 886217 | C   | T    | CDS     | 0833      | Citrate lyase beta chain                      | Non      | Ala_A | Val_V | Con      | 1              |
| 361 | 891596 | T   | C    | CDS     | 0838      | unknown function                              | Non      | Ile_I | Val_V | Con      | 1              |
| 362 | 892506 | G   | A    | IG      | IG        | IG                                            | --       | --    | --    | --       | 1              |
| 363 | 893301 | G   | A    | CDS     | 0839      | Tyrosine recombinase xerC                     | Non      | Leu_L | Phe_F | Con      | 1              |
| 364 | 893651 | C   | T    | IG      | IG        | IG                                            | --       | --    | --    | --       | 1              |
| 365 | 893674 | T   | A    | IG      | IG        | IG                                            | --       | --    | --    | --       | 1              |
| 366 | 901307 | C   | T    | CDS     | 0846      | UDP-MurNAc-pp-lysine N(6)-alanyltransferase   | Syn      | Lys_K | Lys_K | --       | 10             |
| 367 | 903712 | G   | A    | CDS     | 0847      | ABC transporter ATP-binding protein           | Non      | Ala_A | Val_V | Con      | 39             |
| 368 | 908783 | G   | A    | CDS     | 0852      | Cardiolipin synthetase                        | Syn      | Tyr_Y | Tyr_Y | --       | 1              |
| 369 | 911132 | C   | T    | CDS     | 0853      | Formate--tetrahydrofolate ligase              | Non      | Met_M | Ile_I | Con      | 1              |
| 370 | 913036 | T   | C    | CDS     | 0855      | chromosome architecture/replication ATPase    | Syn      | Gln_Q | Gln_Q | --       | 86             |
| 371 | 914240 | C   | T    | CDS     | 0856      | chromosome architecture/replication ATPase    | Syn      | Leu_L | Leu_L | --       | 3              |
| 372 | 916032 | G   | A    | CDS     | 0859      | Putative trimethylamine dehydrogenase         | Non      | His_H | Tyr_Y | Con      | 5              |
| 373 | 920897 | A   | G    | CDS     | 0864      | Phosphoglucomutase                            | Non      | Ile_I | Val_V | Con      | 1              |
| 374 | 924493 | A   | G    | CDS     | 0867      | Putative deoxyribose-specific ABC transporter | Non      | Ser_S | Pro_P | Con      | 23             |
| 375 | 926557 | T   | C    | CDS     | 0868      | Nucleoside-binding protein                    | Non      | Ser_S | Gly_G | Con      | 1              |
| 376 | 927384 | A   | G    | IG      | IG        | IG                                            | --       | --    | --    | --       | 1              |
| 377 | 927398 | A   | G    | IG      | IG        | IG                                            | --       | --    | --    | --       | 1              |



Table S2 cont.

| No. | Locus   | Ref | Test | CDS /IG | Locus Tag | Annotation                                        | Syn /Non | Ref   | Test  | Con /Rad | No. of Strains |
|-----|---------|-----|------|---------|-----------|---------------------------------------------------|----------|-------|-------|----------|----------------|
| 378 | 930663  | C   | T    | CDS     | 0873      | Two component system sensor histidine kinase CiaH | Non      | Val_V | Ile_I | Con      | 1              |
| 379 | 933863  | C   | T    | CDS     | 0875      | Lysyl-aminopeptidase; aminopeptidase N            | Non      | Asp_D | Asn_N | Con      | 10             |
| 380 | 934254  | T   | C    | CDS     | 0875      | Lysyl-aminopeptidase; aminopeptidase N            | Syn      | Thr_T | Thr_T | --       | 1              |
| 381 | 935891  | A   | T    | CDS     | 0877      | Phosphate transport protein pstB                  | Non      | Leu_L | STOP  | STOP     | 1              |
| 382 | 936462  | G   | A    | CDS     | 0877      | Phosphate transport protein pstB                  | Non      | Pro_P | Ser_S | Con      | 1              |
| 383 | 939321  | C   | T    | CDS     | 0881      | Phosphate ABC transporter protein pstS            | Syn      | Val_V | Val_V | --       | 1              |
| 384 | 940431  | A   | T    | CDS     | 0882      | tRNA and rRNA cytosine-C5-methylases              | Syn      | Gly_Q | Gly_G | --       | 4              |
| 385 | 941901  | T   | G    | CDS     | 0883      | Myo-inositol-1(or 4)-monophosphatase              | Non      | Gln_Q | Pro_P | Con      | 1              |
| 386 | 943568  | G   | A    | CDS     | 0886      | Riboflavin kinase                                 | Non      | Ser_S | Leu_L | Rad      | 1              |
| 387 | 949710  | G   | A    | CDS     | 0891      | ABC transporter permease protein                  | Non      | Ala_A | Val_V | Con      | 36             |
| 388 | 959456  | A   | T    | IG      | IG        | IG                                                | --       | --    | --    | --       | 1              |
| 389 | 959976  | T   | C    | IG      | IG        | IG                                                | --       | --    | --    | --       | 2              |
| 390 | 961312  | T   | G    | IG      | IG        | IG                                                | --       | --    | --    | --       | 1              |
| 391 | 966666  | G   | A    | CDS     | 0910      | Glucosamine--fructose-6-P aminotransferase        | Non      | Thr_T | Ile_I | Con      | 1              |
| 392 | 967157  | G   | A    | CDS     | 0910      | Glucosamine--fructose-6-P aminotransferase        | Syn      | Gly_Q | Gly_G | --       | 1              |
| 393 | 967423  | T   | C    | IG      | IG        | IG                                                | --       | --    | --    | --       | 14             |
| 394 | 970425  | T   | C    | CDS     | 0913      | 6-phosphofructokinase                             | Syn      | Ala_A | Ala_A | --       | 1              |
| 395 | 970889  | A   | G    | IG      | IG        | IG                                                | --       | --    | --    | --       | 1              |
| 396 | 971026  | A   | G    | CDS     | 0914      | DNA polymerase III                                | Syn      | Ile_I | Ile_I | --       | 1              |
| 397 | 972816  | C   | T    | CDS     | 0914      | DNA polymerase III                                | Non      | Val_V | Ile_I | Con      | 1              |
| 398 | 973734  | G   | A    | CDS     | 0914      | DNA polymerase III                                | Non      | Leu_L | Phe_F | Con      | 1              |
| 399 | 974807  | G   | A    | CDS     | 0916      | ABC-type multidrug transport system               | Non      | Arg_R | His_H | Con      | 1              |
| 400 | 975292  | A   | T    | CDS     | 0916      | ABC-type multidrug transport system               | Non      | Thr_T | Ser_S | Con      | 23             |
| 401 | 975504  | T   | C    | CDS     | 0917      | ABC transporter, ATP-binding protein              | Syn      | Phe_F | Phe_F | --       | 5              |
| 402 | 1019065 | G   | A    | CDS     | 0979      | lipoprotein, putative                             | Syn      | Leu_L | Leu_L | --       | 24             |
| 403 | 1019314 | G   | A    | IG      | IG        | IG                                                | --       | --    | --    | --       | 1              |
| 404 | 1020687 | G   | A    | CDS     | 0980      | Glycogen phosphorylase                            | Syn      | Thr_T | Thr_T | --       | 1              |
| 405 | 1022760 | C   | T    | CDS     | 0981      | 4-alpha-glucanotransferase                        | Non      | Ala_A | Thr_T | Con      | 6              |
| 406 | 1022824 | T   | A    | CDS     | 0981      | 4-alpha-glucanotransferase                        | Syn      | Thr_T | Thr_T | --       | 2              |
| 407 | 1023643 | G   | A    | CDS     | 0982      | Maltose operon transcriptional repressor MalR     | Syn      | Ser_S | Ser_S | --       | 10             |
| 408 | 1023900 | G   | A    | CDS     | 0982      | Maltose operon transcriptional repressor MalR     | Non      | Gln_Q | STOP  | STOP     | 1              |
| 409 | 1026493 | A   | G    | CDS     | 0984      | Maltose/maltodextrin ABC transporter protein MalF | Non      | Ser_S | Gly_G | Con      | 1              |
| 410 | 1026908 | C   | T    | CDS     | 0984      | Maltose/maltodextrin ABC transporter protein MalF | Non      | Thr_T | Ile_I | Con      | 2              |
| 411 | 1028537 | A   | C    | CDS     | 0987      | putative transposase N-terminal portion           | Syn      | Ser_S | Ser_S | --       | 1              |
| 412 | 1028567 | C   | G    | CDS     | 0987      | putative transposase N-terminal portion           | Syn      | Arg_R | Arg_R | --       | 1              |
| 413 | 1030601 | A   | G    | CDS     | 0990      | Esterase                                          | Syn      | Asn_N | Asn_N | --       | 1              |
| 414 | 1033471 | C   | T    | CDS     | 0993      | D-alanyl transfer protein DltB                    | Non      | Gly_G | Arg_R | Rad      | 2              |
| 415 | 1035354 | T   | A    | IG      | IG        | IG                                                | --       | --    | --    | --       | 1              |
| 416 | 1037803 | A   | T    | CDS     | 0997      | Glutamine ABC transporter                         | Syn      | Thr_T | Thr_T | --       | 1              |
| 417 | 1039955 | C   | T    | CDS     | 0998      | Glutamine transport protein glnQ                  | Non      | Ala_A | Val_V | Con      | 6              |
| 418 | 1040577 | C   | T    | CDS     | 0998      | Glutamine transport protein glnQ                  | Syn      | His_H | His_H | --       | 3              |
| 419 | 1040731 | G   | A    | IG      | IG        | IG                                                | --       | --    | --    | --       | 1              |
| 420 | 1040775 | G   | A    | CDS     | 0999      | unknown function                                  | Non      | Arg_R | Cys_C | Rad      | 1              |
| 421 | 1041721 | C   | T    | CDS     | 1000      | PTS system, cellobiose-specific IIC               | Non      | Arg_R | His_H | Con      | 2              |
| 422 | 1044396 | C   | T    | CDS     | 1005      | Transcriptional antiterminator of lichenan operon | Non      | Ala_A | Thr_T | Con      | 1              |
| 423 | 1044702 | C   | T    | CDS     | 1005      | Transcriptional antiterminator of lichenan operon | Non      | Asp_D | Asn_N | Con      | 1              |
| 424 | 1045382 | T   | C    | CDS     | 1005      | Transcriptional antiterminator of lichenan operon | Non      | Asp_D | Gly_G | Con      | 1              |
| 425 | 1049136 | C   | T    | CDS     | 1009      | unknown function                                  | Syn      | Leu_L | Leu_L | --       | 1              |
| 426 | 1051557 | A   | G    | CDS     | 1011      | putative transposase associated protein           | Syn      | Arg_R | Arg_R | --       | 1              |
| 427 | 1051565 | C   | T    | CDS     | 1011      | putative transposase associated protein           | Non      | Ala_A | Val_V | Con      | 1              |
| 428 | 1051569 | A   | G    | CDS     | 1011      | putative transposase associated protein           | Syn      | Lys_K | Lys_K | --       | 1              |
| 429 | 1051686 | C   | T    | CDS     | 1012      | Transposase                                       | Non      | Gln_Q | STOP  | STOP     | 1              |
| 430 | 1051782 | T   | C    | CDS     | 1012      | Transposase                                       | Non      | Cys_C | Arg_R | Rad      | 1              |
| 431 | 1051842 | C   | T    | CDS     | 1012      | Transposase                                       | Syn      | Leu_L | Leu_L | --       | 1              |
| 432 | 1051851 | T   | C    | CDS     | 1012      | Transposase                                       | Non      | Cys_C | Arg_R | Rad      | 1              |
| 433 | 1051866 | T   | C    | CDS     | 1012      | Transposase                                       | Non      | Cys_C | Arg_R | Rad      | 1              |
| 434 | 1054883 | C   | T    | CDS     | 1014      | Malonate permease                                 | Syn      | Pro_p | Pro_P | --       | 2              |
| 435 | 1055067 | G   | A    | CDS     | 1014      | Malonate permease                                 | Non      | Val_V | Met_M | Con      | 1              |
| 436 | 1055202 | A   | G    | IG      | IG        | IG                                                | --       | --    | --    | --       | 1              |
| 437 | 1056106 | G   | A    | CDS     | 1017      | putative transposase - IS904A                     | Non      | Arg_R | Gln_Q | Con      | 3              |
| 438 | 1056126 | C   | T    | CDS     | 1017      | putative transposase - IS904A                     | Non      | Arg_R | Trp_W | Rad      | 3              |
| 439 | 1056136 | A   | G    | CDS     | 1017      | putative transposase - IS904A                     | Non      | Tyr_Y | Cys_C | Rad      | 1              |
| 440 | 1056146 | G   | T    | CDS     | 1017      | putative transposase - IS904A                     | Non      | Arg_R | Ser_S | Rad      | 3              |

Table S2 cont.

| No. | Locus   | Ref | Test | CDS /IG | Locus Tag | Annotation                                       | Syn /Non | Ref   | Test  | Con /Rad | No. of Strains |
|-----|---------|-----|------|---------|-----------|--------------------------------------------------|----------|-------|-------|----------|----------------|
| 441 | 1056189 | G   | T    | CDS     | 1017      | putative transposase - IS904A                    | Non      | Ala_A | Ser_S | Con      | 3              |
| 442 | 1056211 | G   | A    | CDS     | 1017      | putative transposase - IS904A                    | Non      | Arg_R | Lys_K | Con      | 3              |
| 443 | 1056592 | G   | A    | CDS     | 1018      | Ribosomal small subunit pseudouridine synthase A | Syn      | Gly_G | Gly_G | --       | 1              |
| 444 | 1059231 | G   | A    | CDS     | 1021      | ATP-dependent Zn protease                        | Syn      | Lys_K | Lys_K | --       | 1              |
| 445 | 1060275 | T   | C    | CDS     | 1021      | ATP-dependent Zn protease                        | Syn      | Pro_P | Pro_p | --       | 1              |
| 446 | 1060414 | G   | A    | CDS     | 1021      | ATP-dependent Zn protease                        | Non      | Glu_E | Lys_K | Con      | 1              |
| 447 | 1063938 | C   | T    | CDS     | 1025      | Putative PBP synthesis repressor                 | Non      | Val_V | Ile_I | Con      | 3              |
| 448 | 1067702 | C   | T    | CDS     | 1028      | Ribonuclease                                     | Non      | Arg_R | Gln_Q | Con      | 1              |
| 449 | 1068710 | G   | A    | CDS     | 1029      | Methionine aminopeptidase                        | Syn      | His_H | His_H | --       | 1              |
| 450 | 1071276 | A   | G    | CDS     | 1032      | GRAB protein                                     | Syn      | Asp_D | Asp_D | --       | 1              |
| 451 | 1076895 | C   | T    | CDS     | 1035      | internalin                                       | Non      | Met_M | Ile_I | Con      | 1              |
| 452 | 1077899 | G   | A    | IG      | IG        | IG                                               | --       | --    | --    | --       | 17             |
| 453 | 1077928 | C   | G    | IG      | IG        | IG                                               | --       | --    | --    | --       | 1              |
| 454 | 1078726 | G   | T    | CDS     | 1036      | Biotin-protein ligase                            | Syn      | Ala_A | Ala_A | --       | 5              |
| 455 | 1078777 | C   | T    | CDS     | 1036      | Biotin-protein ligase                            | Syn      | Arg_R | Arg_R | --       | 1              |
| 456 | 1079364 | A   | G    | CDS     | 1038      | DNA polymerase III                               | Syn      | Val_V | Val_V | --       | 5              |
| 457 | 1084572 | C   | T    | CDS     | 1043      | ATP-dependent RNA helicase                       | Non      | Thr_T | Ile_I | Con      | 1              |
| 458 | 1084815 | A   | G    | CDS     | 1044      | Peptidoglycan GlcNAc deacetylase                 | Syn      | His_H | His_H | --       | 1              |
| 459 | 1086464 | G   | A    | CDS     | 1045      | glyceraldehyde-3-phosphate dehydrogenase         | Non      | Ala_A | Val_V | Con      | 1              |
| 460 | 1087785 | T   | A    | CDS     | 1046      | Phosphoenolpyruvate-protein phosphotransferase   | Non      | Glu_E | Val_V | Rad      | 1              |
| 461 | 1089991 | G   | A    | pbs     | IG        | NrdR_Proteobacteria                              | --       | --    | --    | --       | 1              |
| 462 | 1091393 | A   | G    | CDS     | 1049      | Ribonucleotide reductase of class Ib             | Syn      | Glu_E | Glu_E | --       | 6              |
| 463 | 1092744 | C   | A    | IG      | IG        | IG                                               | --       | --    | --    | --       | 17             |
| 464 | 1094245 | G   | A    | CDS     | 1051      | Chloride channel protein                         | Non      | Trp_W | STOP  | STOP     | 19             |
| 465 | 1095918 | T   | A    | IG      | IG        | IG                                               | --       | --    | --    | --       | 1              |
| 466 | 1098505 | C   | T    | CDS     | 1058      | Alanyl-tRNA synthetase                           | Syn      | Val_V | Val_V | --       | 1              |
| 467 | 1101887 | G   | T    | CDS     | 1059      | Foldase protein prsA                             | Non      | Pro_P | Thr_T | Con      | 16             |
| 468 | 1104382 | A   | G    | CDS     | 1061      | Major facilitator:Oxalate:Formate Antiporter     | Syn      | Pro_P | Pro_p | --       | 2              |
| 469 | 1104478 | C   | T    | CDS     | 1061      | Major facilitator:Oxalate:Formate Antiporter     | Non      | Trp_W | STOP  | STOP     | 1              |
| 470 | 1106038 | A   | C    | CDS     | 1062      | Oligoendopeptidase F                             | Syn      | Val_V | Val_V | --       | 1              |
| 471 | 1106386 | A   | G    | CDS     | 1062      | Oligoendopeptidase F                             | Syn      | Asp_D | Asp_D | --       | 1              |
| 472 | 1108998 | C   | A    | CDS     | 1065      | Glucosamine-6-phosphate deaminase                | Non      | Ala_A | Ser_S | Con      | 23             |
| 473 | 1113430 | C   | T    | CDS     | 1071      | Manganese superoxide dismutase                   | Non      | Ala_A | Thr_T | Con      | 2              |
| 474 | 1114921 | C   | T    | CDS     | 1072      | DNA polymerase III                               | Non      | Asp_D | Asn_N | Con      | 3              |
| 475 | 1115629 | T   | C    | CDS     | 1073      | late competence protein comEC                    | Non      | Tyr_Y | Cys_C | Rad      | 70             |
| 476 | 1119152 | G   | A    | CDS     | 1076      | COG4123: Predicted O-methyltransferase           | Non      | Gly_G | Ser_S | Con      | 1              |
| 477 | 1121564 | C   | T    | CDS     | 1078      | Kup system potassium uptake protein              | Syn      | Leu_L | Leu_L | --       | 1              |
| 478 | 1121783 | C   | T    | CDS     | 1078      | Kup system potassium uptake protein              | Syn      | Leu_L | Leu_L | --       | 3              |
| 479 | 1122228 | A   | C    | IG      | IG        | IG                                               | --       | --    | --    | --       | 1              |
| 480 | 1126295 | C   | T    | CDS     | 1082      | membrane protein, putative                       | Non      | Ala_A | Thr_T | Con      | 16             |
| 481 | 1128304 | G   | A    | IG      | IG        | IG                                               | --       | --    | --    | --       | 1              |
| 482 | 1131764 | C   | T    | IG      | IG        | IG                                               | --       | --    | --    | --       | 11             |
| 483 | 1131903 | A   | G    | CDS     | 1088      | predicted niacin ECF transporter                 | Non      | Val_V | Ala_A | Con      | 1              |
| 484 | 1135308 | G   | C    | IG      | IG        | IG                                               | --       | --    | --    | --       | 1              |
| 485 | 1135396 | C   | A    | CDS     | 1093      | Pb, Cd, Zn and Hg transporting ATPase            | Syn      | Thr_T | Thr_T | --       | 3              |
| 486 | 1135601 | G   | A    | CDS     | 1093      | Pb, Cd, Zn and Hg transporting ATPase            | Non      | Thr_T | Ile_I | Con      | 1              |
| 487 | 1172322 | A   | T    | IG      | IG        | IG                                               | --       | --    | --    | --       | 3              |
| 488 | 1174118 | A   | G    | CDS     | 1149      | unknown function                                 | Non      | Ile_I | Thr_T | Con      | 5              |
| 489 | 1174752 | G   | A    | IG      | IG        | IG                                               | --       | --    | --    | --       | 1              |
| 490 | 1179891 | C   | T    | CDS     | 1155      | Exodeoxyribonuclease VII                         | Non      | Gly_G | Arg_R | Rad      | 1              |
| 491 | 1181412 | T   | C    | IG      | IG        | IG                                               | --       | --    | --    | --       | 16             |
| 492 | 1183038 | C   | T    | CDS     | 1158      | putative phosphomannomutase                      | Non      | Gly_G | Ser_S | Con      | 1              |
| 493 | 1184490 | G   | A    | CDS     | 1159      | Deoxyribodipyrimidine photolyase                 | Non      | Leu_L | Phe_F | Con      | 1              |
| 494 | 1186147 | G   | A    | CDS     | 1160      | Glutamine transport ATP-binding protein glnQ     | Syn      | Leu_L | Leu_L | --       | 25             |
| 495 | 1186151 | T   | A    | CDS     | 1160      | Glutamine transport ATP-binding protein glnQ     | Syn      | Ser_S | Ser_S | --       | 1              |
| 496 | 1186289 | G   | A    | CDS     | 1160      | Glutamine transport ATP-binding protein glnQ     | Syn      | Ser_S | Ser_S | --       | 1              |
| 497 | 1187925 | T   | C    | IG      | IG        | IG                                               | --       | --    | --    | --       | 4              |
| 498 | 1187947 | C   | T    | IG      | IG        | IG                                               | --       | --    | --    | --       | 1              |
| 499 | 1195058 | T   | C    | CDS     | 1167      | Cell division initiation protein DivIVA          | Non      | Asn_N | Asp_D | Con      | 1              |
| 500 | 1199100 | A   | T    | CDS     | 1173      | Cell division protein ftsA                       | Syn      | Ile_I | Ile_I | --       | 11             |
| 501 | 1200565 | G   | A    | IG      | IG        | IG                                               | --       | --    | --    | --       | 1              |
| 502 | 1203073 | G   | A    | CDS     | 1176      | UDP-MurNAc-alanine--D-glutamate ligase           | Non      | Arg_R | Cys_C | Rad      | 40             |
| 503 | 1205969 | G   | A    | CDS     | 1178      | GTP-binding protein TypA/BipA                    | Non      | Ala_A | Val_V | Con      | 1              |

Table S2 cont.

| No. | Locus   | Ref | Test | CDS /IG | Locus Tag | Annotation                                    | Syn /Non | Ref   | Test  | Con /Rad | No. of Strains |
|-----|---------|-----|------|---------|-----------|-----------------------------------------------|----------|-------|-------|----------|----------------|
| 504 | 1206168 | G   | A    | CDS     | 1178      | GTP-binding protein TypA/BipA                 | Non      | Pro_P | Ser_S | Con      | 1              |
| 505 | 1209268 | G   | A    | IG      | IG        | IG                                            | --       | --    | --    | --       | 1              |
| 506 | 1215091 | G   | C    | CDS     | 1188      | Phosphopantetheine adenylyltransferase        | Non      | Thr_T | Ser_S | Con      | 20             |
| 507 | 1216179 | A   | G    | CDS     | 1190      | Aspartate--ammonia ligase                     | Syn      | Asn_N | Asn_N | --       | 6              |
| 508 | 1217049 | C   | T    | IG      | IG        | IG                                            | --       | --    | --    | --       | 1              |
| 509 | 1217650 | C   | T    | CDS     | 1191      | Carbamate kinase                              | Non      | Gly_G | Asp_D | Con      | 1              |
| 510 | 1218814 | C   | T    | CDS     | 1192      | Xaa-His dipeptidase                           | Syn      | Lys_K | Lys_K | --       | 1              |
| 511 | 1219476 | G   | A    | IG      | IG        | IG                                            | --       | --    | --    | --       | 1              |
| 512 | 1220774 | G   | A    | CDS     | 1193      | Arginine/ornithine antiporter ArcD            | Syn      | Gly_G | Gly_G | --       | 5              |
| 513 | 1224182 | T   | A    | IG      | IG        | IG                                            | --       | --    | --    | --       | 7              |
| 514 | 1224183 | T   | A    | IG      | IG        | IG                                            | --       | --    | --    | --       | 7              |
| 515 | 1224184 | T   | C    | IG      | IG        | IG                                            | --       | --    | --    | --       | 7              |
| 516 | 1224430 | T   | G    | CDS     | 1197      | Transcriptional regulator ArcR                | Non      | Met_M | Leu_L | Con      | 1              |
| 517 | 1229090 | T   | C    | CDS     | 1201      | Two-component sensor kinase yesM              | Non      | Asp_D | Gly_G | Con      | 8              |
| 518 | 1229620 | G   | A    | CDS     | 1202      | Two-component response regulator yesN         | Non      | Ala_A | Val_V | Con      | 1              |
| 519 | 1272025 | G   | C    | CDS     | 1267      | Peptide methionine sulfoxide reductase        | Syn      | Gly_G | Gly_G | --       | 18             |
| 520 | 1273604 | G   | A    | CDS     | 1268      | Thiol:disulfide oxidoreductase                | Non      | Thr_T | Ile_I | Con      | 17             |
| 521 | 1274506 | T   | C    | IG      | IG        | IG                                            | --       | --    | --    | --       | 1              |
| 522 | 1276450 | T   | C    | CDS     | 1271      | Oxidoreductase, Gfo/Idh/MocA family           | Non      | Asp_D | Gly_G | Con      | 3              |
| 523 | 1282510 | A   | G    | CDS     | 1277      | unknown function                              | Syn      | Ile_I | Ile_I | --       | 73             |
| 524 | 1283071 | A   | G    | IG      | IG        | IG                                            | --       | --    | --    | --       | 1              |
| 525 | 1283090 | C   | T    | IG      | IG        | IG                                            | --       | --    | --    | --       | 1              |
| 526 | 1287161 | G   | A    | CDS     | 1283      | Ubiquinone biosynthesis methyltransferase     | Non      | Thr_T | Ile_I | Con      | 1              |
| 527 | 1292747 | A   | G    | CDS     | 1286      | Two-component response regulator yesN         | Non      | Val_V | Ala_A | Con      | 1              |
| 528 | 1296749 | C   | A    | CDS     | 1289      | Sugar-binding protein                         | Non      | Glu_E | STOP  | STOP     | 1              |
| 529 | 1298852 | C   | T    | CDS     | 1291      | Multiple sugar ABC transporter MsmF           | Non      | Met_M | Ile_I | Con      | 1              |
| 530 | 1300321 | C   | T    | CDS     | 1292      | N-acetylmannosamine kinase                    | Syn      | Ala_A | Ala_A | --       | 1              |
| 531 | 1300624 | C   | T    | IG      | IG        | IG                                            | --       | --    | --    | --       | 16             |
| 532 | 1301424 | T   | C    | CDS     | 1293      | Beta-glucosidase                              | Syn      | Val_V | Val_V | --       | 1              |
| 533 | 1307932 | C   | T    | CDS     | 1297      | Alpha-mannosidase                             | Non      | Ala_A | Val_V | Con      | 1              |
| 534 | 1309701 | A   | G    | IG      | IG        | IG                                            | --       | --    | --    | --       | 9              |
| 535 | 1310694 | A   | G    | CDS     | 1298      | Putative TCS histidine kinase                 | Syn      | Asn_N | Asn_N | --       | 1              |
| 536 | 1311420 | G   | A    | IG      | IG        | IG                                            | --       | --    | --    | --       | 1              |
| 537 | 1311968 | G   | A    | CDS     | 1299      | RNA methyltransferase, TrmA family            | Non      | Ala_A | Val_V | Con      | 1              |
| 538 | 1354603 | G   | A    | IG      | IG        | IG                                            | --       | --    | --    | --       | 1              |
| 539 | 1362922 | C   | T    | CDS     | 1361      | comF operon protein A, DNA transporter ATPase | Non      | Ala_A | Thr_T | Con      | 2              |
| 540 | 1365099 | G   | A    | CDS     | 1364      | General stress protein 13                     | Non      | Pro_P | Leu_L | Con      | 1              |
| 541 | 1365959 | A   | G    | CDS     | 1365      | Streptococcal lipoprotein rotamase A          | Non      | Ile_I | Thr_T | Con      | 6              |
| 542 | 1368463 | A   | G    | CDS     | 1368      | Transporter yvqF                              | Syn      | Ile_I | Ile_I | --       | 6              |
| 543 | 1380032 | G   | C    | CDS     | 1377      | Transcriptional regulators, LysR family       | Non      | Pro_P | Arg_R | Rad      | 16             |
| 544 | 1384410 | A   | G    | CDS     | 1383      | D-beta-hydroxybutyrate permease               | Syn      | Ala_A | Ala_A | --       | 1              |
| 545 | 1386291 | G   | A    | CDS     | 1385      | unknown function                              | Non      | Pro_P | Leu_L | Con      | 1              |
| 546 | 1386987 | G   | A    | CDS     | 1385      | unknown function                              | Non      | Pro_P | Leu_L | Con      | 1              |
| 547 | 1389549 | A   | G    | CDS     | 1388      | unknown function                              | Non      | Tyr_Y | His_H | Con      | 1              |
| 548 | 1398545 | C   | T    | CDS     | 1394      | Amino acid permease                           | Non      | Ala_A | Thr_T | Con      | 1              |
| 549 | 1403116 | G   | A    | CDS     | 1399      | ATP-dependent RNA helicase YqfR               | Non      | Arg_R | Cys_C | Rad      | 1              |
| 550 | 1408991 | A   | G    | CDS     | 1406      | Gamma-glutamyl phosphate reductase            | Non      | Val_V | Ala_A | Con      | 2              |
| 551 | 1456631 | A   | T    | CDS     | 1464      | Trans-acting positive regulator               | Non      | Cys_C | Ser_S | Rad      | 1              |
| 552 | 1459415 | G   | A    | CDS     | 1466      | Glycerol uptake facilitator protein           | Non      | Ala_A | Val_V | Con      | 1              |
| 553 | 1459752 | C   | T    | CDS     | 1466      | Glycerol uptake facilitator protein           | Non      | Ala_A | Thr_T | Con      | 1              |
| 554 | 1459819 | G   | C    | CDS     | 1466      | Glycerol uptake facilitator protein           | Syn      | Ala_A | Ala_A | --       | 2              |
| 555 | 1459955 | C   | T    | CDS     | 1466      | Glycerol uptake facilitator protein           | Non      | Gly_G | Asp_D | Con      | 10             |
| 556 | 1460518 | G   | A    | CDS     | 1467      | Aerobic glycerol-3-phosphate dehydrogenase    | Non      | Pro_P | Ser_S | Con      | 1              |
| 557 | 1465235 | T   | G    | CDS     | 1471      | Glycyl-tRNA synthetase beta chain             | Non      | Lys_K | Gln_Q | Con      | 18             |
| 558 | 1465401 | G   | A    | CDS     | 1471      | Glycyl-tRNA synthetase beta chain             | Syn      | Phe_F | Phe_F | --       | 1              |
| 559 | 1466966 | T   | C    | IG      | IG        | IG                                            | --       | --    | --    | --       | 63             |
| 560 | 1469148 | A   | G    | CDS     | 1474      | oxidoreductase                                | Non      | Ser_S | Pro_P | Con      | 89             |
| 561 | 1470224 | G   | A    | CDS     | 1475      | GlcNAc-6-phosphate deacetylase                | Syn      | Thr_T | Thr_T | --       | 1              |
| 562 | 1471633 | G   | A    | CDS     | 1476      | Sodium-dependent phosphate transporter        | Non      | Arg_R | Cys_C | Rad      | 16             |
| 563 | 1471920 | T   | A    | CDS     | 1476      | Sodium-dependent phosphate transporter        | Non      | Tyr_Y | Phe_F | Con      | 1              |
| 564 | 1473301 | T   | C    | CDS     | 1477      | unknown function                              | Syn      | Phe_F | Phe_F | --       | 1              |
| 565 | 1475087 | T   | C    | IG      | IG        | IG                                            | --       | --    | --    | --       | 1              |
| 566 | 1475088 | T   | C    | IG      | IG        | IG                                            | --       | --    | --    | --       | 1              |

Table S2 cont.

| No. | Locus   | Ref | Test | CDS /IG | Locus Tag | Annotation                                     | Syn /Non | Ref   | Test  | Con /Rad | No. of Strains |
|-----|---------|-----|------|---------|-----------|------------------------------------------------|----------|-------|-------|----------|----------------|
| 567 | 1477774 | C   | T    | CDS     | 1482      | Tagatose 1,6-diphosphate aldolase              | Syn      | Val_V | Val_V | --       | 1              |
| 568 | 1478114 | A   | G    | CDS     | 1482      | Tagatose 1,6-diphosphate aldolase              | Non      | Val_V | Ala_A | Con      | 70             |
| 569 | 1481314 | C   | T    | CDS     | 1486      | PTS system, galactose-specific IIC component   | Non      | Gly_G | Glu_E | Con      | 2              |
| 570 | 1482194 | G   | A    | CDS     | 1488      | PTS system, galactose-specific IIA component   | Syn      | Asp_D | Asp_D | --       | 1              |
| 571 | 1482327 | G   | A    | CDS     | 1488      | PTS system, galactose-specific IIA component   | Non      | Thr_T | Ile_I | Con      | 1              |
| 572 | 1482416 | C   | T    | IG      | IG        | IG                                             | --       | --    | --    | --       | 1              |
| 573 | 1484947 | C   | T    | CDS     | 1491      | Copper-translocating P-type ATPase             | Syn      | Val_V | Val_V | --       | 6              |
| 574 | 1487337 | T   | C    | CDS     | 1493      | putative esterase                              | Non      | Tyr_Y | His_H | Con      | 6              |
| 575 | 1487474 | A   | G    | CDS     | 1493      | putative esterase                              | Syn      | Lys_K | Lys_K | --       | 1              |
| 576 | 1488312 | C   | T    | CDS     | 1495      | Translation initiation factor 2                | Non      | Glu_E | Lys_K | Con      | 3              |
| 577 | 1489915 | A   | G    | CDS     | 1495      | Translation initiation factor 2                | Syn      | Asp_D | Asp_D | --       | 1              |
| 578 | 1497764 | G   | A    | CDS     | 1505      | unknown function                               | Non      | Ala_A | Thr_T | Con      | 1              |
| 579 | 1498551 | T   | C    | CDS     | 1506      | Transcriptional regulator, LytR family         | Non      | Thr_T | Ala_A | Con      | 1              |
| 580 | 1500872 | A   | G    | CDS     | 1509      | Guanine-hypoxanthine permease                  | Non      | Ile_I | Thr_T | Con      | 93             |
| 581 | 1501014 | C   | A    | CDS     | 1509      | Guanine-hypoxanthine permease                  | Non      | Glu_E | STOP  | STOP     | 3              |
| 582 | 1501703 | C   | T    | CDS     | 1509      | Guanine-hypoxanthine permease                  | Non      | Gly_G | Asp_D | Con      | 3              |
| 583 | 1501884 | A   | G    | CDS     | 1509      | Guanine-hypoxanthine permease                  | Non      | Phe_F | Leu_L | Con      | 1              |
| 584 | 1504386 | G   | A    | CDS     | 1511      | PTS system, mannose-specific IIB component     | Non      | Ala_A | Thr_T | Con      | 3              |
| 585 | 1507086 | C   | T    | CDS     | 1515      | putative transposase - IS1548                  | Non      | Pro_P | Ser_S | Con      | 1              |
| 586 | 1508031 | A   | T    | IG      | IG        | IG                                             | --       | --    | --    | --       | 1              |
| 587 | 1509415 | C   | G    | CDS     | 1516      | Seryl-tRNA synthetase                          | Syn      | Thr_T | Thr_T | --       | 1              |
| 588 | 1509527 | G   | T    | CDS     | 1516      | Seryl-tRNA synthetase                          | Non      | Ala_A | Ser_S | Con      | 1              |
| 589 | 1514831 | T   | C    | CDS     | 1522      | 3-oxoacyl-[acyl-carrier-protein] synthase      | Non      | Ile_I | Val_V | Con      | 1              |
| 590 | 1515192 | A   | G    | CDS     | 1523      | 3-oxoacyl-[acyl-carrier-protein] reductase     | Non      | Val_V | Ala_A | Con      | 3              |
| 591 | 1518653 | C   | A    | CDS     | 1527      | 3-oxoacyl-[acyl-carrier-protein] synthase      | Syn      | Pro_P | Pro_P | --       | 38             |
| 592 | 1519050 | C   | T    | CDS     | 1527      | 3-oxoacyl-[acyl-carrier-protein] synthase      | Non      | Gly_G | Glu_E | Con      | 3              |
| 593 | 1519054 | A   | T    | CDS     | 1527      | 3-oxoacyl-[acyl-carrier-protein] synthase      | Non      | Ser_S | Thr_T | Con      | 3              |
| 594 | 1519058 | A   | G    | CDS     | 1527      | 3-oxoacyl-[acyl-carrier-protein] synthase      | Syn      | Thr_T | Thr_T | --       | 3              |
| 595 | 1519059 | G   | A    | CDS     | 1527      | 3-oxoacyl-[acyl-carrier-protein] synthase      | Non      | Thr_T | Ile_I | Con      | 1              |
| 596 | 1525730 | C   | T    | CDS     | 1533      | Heat-inducible transcription repressor HrcA    | Syn      | Gly_G | Gly_G | --       | 41             |
| 597 | 1528442 | A   | C    | CDS     | 1537      | Integral membrane protein                      | Non      | Phe_F | Leu_L | Con      | 1              |
| 598 | 1534713 | T   | C    | IG      | IG        | IG                                             | --       | --    | --    | --       | 1              |
| 599 | 1536050 | C   | T    | CDS     | 1545      | Aspartate aminotransferase                     | Syn      | Ala_A | Ala_A | --       | 6              |
| 600 | 1536233 | C   | T    | IG      | IG        | IG                                             | --       | --    | --    | --       | 16             |
| 601 | 1540610 | C   | T    | CDS     | 1550      | putative ABC transporter                       | Non      | Val_V | Ile_I | Con      | 1              |
| 602 | 1544580 | G   | A    | CDS     | 1553      | Duplicated ATPase component                    | Syn      | Ser_S | Ser_S | --       | 11             |
| 603 | 1549042 | C   | T    | CDS     | 1557      | Putative ABC transporter                       | Syn      | Glu_E | Glu_E | --       | 6              |
| 604 | 1551111 | C   | A    | CDS     | 1559      | Streptococcal heme ABC transporter             | Non      | Ser_S | Ile_I | Rad      | 1              |
| 605 | 1557279 | C   | T    | CDS     | 1561      | Streptococcal surface hemoprotein receptor Shr | Non      | Asp_D | Asn_N | Con      | 1              |
| 606 | 1561493 | G   | T    | CDS     | 1565      | SecA ATPase RNA helicase                       | Non      | Gln_Q | Lys_K | Con      | 1              |
| 607 | 1563662 | C   | A    | CDS     | 1565      | SecA ATPase RNA helicase                       | Non      | Val_V | Leu_L | Con      | 1              |
| 608 | 1565479 | C   | A    | CDS     | 1567      | Fructokinase                                   | Non      | Val_V | Phe_F | Con      | 5              |
| 609 | 1566090 | G   | A    | IG      | IG        | IG                                             | --       | --    | --    | --       | 1              |
| 610 | 1567143 | G   | A    | CDS     | 1568      | Endo-beta-N-acetylglucosaminidase EndoS        | Non      | His_H | Tyr_Y | Con      | 1              |
| 611 | 1568122 | G   | A    | CDS     | 1568      | Endo-beta-N-acetylglucosaminidase EndoS        | Syn      | Asp_D | Asp_D | --       | 1              |
| 612 | 1568511 | C   | T    | CDS     | 1568      | Endo-beta-N-acetylglucosaminidase EndoS        | Non      | Asp_D | Asn_N | Con      | 2              |
| 613 | 1569141 | T   | G    | CDS     | 1568      | Endo-beta-N-acetylglucosaminidase EndoS        | Non      | Thr_T | Pro_p | Con      | 2              |
| 614 | 1570545 | A   | T    | CDS     | 1569      | PTS system, sucrose-specific IIB component     | Syn      | Ala_A | Ala_A | --       | 4              |
| 615 | 1573272 | T   | C    | CDS     | 1571      | Sucrose operon repressor ScrR                  | Non      | Leu_L | Ser_S | Rad      | 24             |
| 616 | 1577764 | G   | A    | CDS     | 1577      | Excinuclease ABC subunit A                     | Non      | Ala_A | Val_V | Con      | 1              |
| 617 | 1579234 | G   | A    | CDS     | 1577      | Excinuclease ABC subunit A                     | Non      | Ser_S | Phe_F | Rad      | 3              |
| 618 | 1580901 | C   | A    | CDS     | 1578      | Magnesium and cobalt transport protein CorA    | Syn      | Ser_S | Ser_S | --       | 19             |
| 619 | 1581937 | T   | C    | CDS     | 1579      | Integral membrane protein                      | Non      | Leu_L | Ser_S | Rad      | 4              |
| 620 | 1583782 | C   | T    | CDS     | 1583      | unknown function                               | Non      | Trp_W | STOP  | STOP     | 1              |
| 621 | 1588379 | G   | T    | CDS     | 1588      | Recombination inhibitory protein MutS2         | Non      | Arg_R | Ser_S | Rad      | 6              |
| 622 | 1591647 | T   | A    | CDS     | 1592      | Signal peptidase I                             | Syn      | Gly_G | Gly_G | --       | 1              |
| 623 | 1592075 | A   | C    | CDS     | 1593      | Exodeoxyribonuclease V alpha chain             | Non      | Lys_K | Thr_T | Con      | 1              |
| 624 | 1592856 | A   | G    | CDS     | 1593      | Exodeoxyribonuclease V alpha chain             | Syn      | Lys_K | Lys_K | --       | 1              |
| 625 | 1592955 | C   | G    | CDS     | 1593      | Exodeoxyribonuclease V alpha chain             | Syn      | Thr_T | Thr_T | --       | 1              |
| 626 | 1594459 | T   | C    | CDS     | 1593      | Exodeoxyribonuclease V alpha chain             | Non      | Ser_S | Pro_p | Con      | 1              |
| 627 | 1595060 | G   | A    | IG      | IG        | IG                                             | --       | --    | --    | --       | 1              |
| 628 | 1596008 | C   | T    | CDS     | 1595      | DNA polymerase IV                              | Non      | Ala_A | Thr_T | Con      | 1              |
| 629 | 1597641 | C   | T    | CDS     | 1596      | Pyruvate formate-lyase                         | Non      | Ala_A | Val_V | Con      | 2              |

Table S2 cont.

| No. | Locus   | Ref | Test | CDS /IG | Locus Tag | Annotation                                       | Syn /Non | Ref   | Test  | Con /Rad | No. of Strains |
|-----|---------|-----|------|---------|-----------|--------------------------------------------------|----------|-------|-------|----------|----------------|
| 630 | 1601536 | C   | T    | CDS     | 1599      | Integral membrane protein                        | Syn      | Phe_F | Phe_F | --       | 1              |
| 631 | 1605096 | T   | C    | CDS     | 1602      | Transcriptional regulator, CrP/Fnr family        | Syn      | Tyr_Y | Tyr_Y | --       | 1              |
| 632 | 1611736 | C   | T    | CDS     | 1610      | NAD(FAD)-utilizing dehydrogenases                | Non      | His_H | Tyr_Y | Con      | 1              |
| 633 | 1613345 | T   | C    | CDS     | 1611      | Deoxyribose-phosphate aldolase                   | Syn      | Leu_L | Leu_L | --       | 5              |
| 634 | 1613488 | G   | T    | CDS     | 1612      | Nucleoside permease nupC                         | Syn      | Ala_A | Ala_A | --       | 3              |
| 635 | 1616776 | A   | T    | CDS     | 1615      | SSU ribosomal protein S14p                       | Non      | Tyr_Y | Phe_F | Con      | 1              |
| 636 | 1618236 | C   | G    | CDS     | 1617      | Ribosomal-protein-S18p-Ala acetyltransferase     | Non      | Gln_Q | His_H | Con      | 3              |
| 637 | 1619537 | A   | T    | IG      | IG        | IG                                               | --       | --    | --    | --       | 1              |
| 638 | 1620754 | G   | A    | CDS     | 1620      | Zn-dependent hydrolase                           | Non      | Gly_G | Asp_D | Con      | 2              |
| 639 | 1627571 | C   | T    | CDS     | 1626      | membrane protease                                | Syn      | Arg_R | Arg_R | --       | 10             |
| 640 | 1628980 | G   | A    | CDS     | 1627      | kinase related to hydroxyacetone kinase          | Syn      | Gly_G | Gly_G | --       | 1              |
| 641 | 1630376 | A   | G    | IG      | IG        | IG                                               | --       | --    | --    | --       | 1              |
| 642 | 1630588 | G   | A    | IG      | IG        | IG                                               | --       | --    | --    | --       | 1              |
| 643 | 1631973 | T   | C    | CDS     | 1631      | Hydrolases of the alpha/beta superfamily         | Non      | Lys_K | Arg_R | Con      | 2              |
| 644 | 1633944 | C   | T    | CDS     | 1632      | CTP synthase                                     | Non      | Gly_G | Arg_R | Rad      | 1              |
| 645 | 1634345 | T   | C    | CDS     | 1632      | CTP synthase                                     | Non      | Tyr_Y | Cys_C | Rad      | 1              |
| 646 | 1634682 | C   | T    | IG      | IG        | IG                                               | --       | --    | --    | --       | 5              |
| 647 | 1638027 | T   | C    | CDS     | 1635      | Potassium efflux mechanosensitive channel        | Syn      | Tyr_Y | Tyr_Y | --       | 1              |
| 648 | 1638438 | A   | T    | CDS     | 1636      | unknown function                                 | Non      | Val_V | Asp_D | Rad      | 1              |
| 649 | 1640751 | A   | G    | IG      | IG        | IG                                               | --       | --    | --    | --       | 1              |
| 650 | 1647055 | A   | T    | IG      | IG        | IG                                               | --       | --    | --    | --       | 76             |
| 651 | 1647056 | A   | T    | IG      | IG        | IG                                               | --       | --    | --    | --       | 76             |
| 652 | 1647075 | G   | C    | IG      | IG        | IG                                               | --       | --    | --    | --       | 76             |
| 653 | 1647120 | G   | A    | IG      | IG        | IG                                               | --       | --    | --    | --       | 71             |
| 654 | 1651729 | A   | T    | CDS     | 1643      | Type I restriction system, specificity subunit S | Non      | Asn_N | Tyr_Y | Rad      | 6              |
| 655 | 1652180 | T   | C    | CDS     | 1643      | Type I restriction system, specificity subunit S | Non      | Leu_L | Ser_S | Rad      | 2              |
| 656 | 1652301 | A   | G    | CDS     | 1643      | Type I restriction system, specificity subunit S | Syn      | Arg_R | Arg_R | --       | 1              |
| 657 | 1656383 | G   | C    | CDS     | 1646      | putative SaK homologue                           | Non      | Pro_p | Ala_A | Con      | 6              |
| 658 | 1659152 | T   | G    | CDS     | 1648      | putative salivaricin A ABC transporter           | Non      | Thr_T | Pro_P | Con      | 3              |
| 659 | 1661654 | T   | G    | CDS     | 1650      | Salivaricin A modification enzyme                | Non      | Glu_E | Ala_A | Rad      | 11             |
| 660 | 1667220 | G   | A    | CDS     | 1654      | PTS system, lactose-specific IIB component       | Non      | Gln_Q | STOP  | STOP     | 1              |
| 661 | 1667466 | C   | A    | CDS     | 1654      | PTS system, lactose-specific IIB component       | Non      | Gly_G | Cys_C | Rad      | 2              |
| 662 | 1667998 | G   | C    | CDS     | 1654      | PTS system, lactose-specific IIB component       | Syn      | Gly_G | Gly_G | --       | 1              |
| 663 | 1668714 | G   | A    | CDS     | 1655      | PTS system, lactose-specific IIA component       | Syn      | Asp_D | Asp_D | --       | 1              |
| 664 | 1668761 | G   | A    | CDS     | 1655      | PTS system, lactose-specific IIA component       | Non      | His_H | Tyr_Y | Con      | 1              |
| 665 | 1668828 | C   | T    | CDS     | 1655      | PTS system, lactose-specific IIA component       | Syn      | Ala_A | Ala_A | --       | 6              |
| 666 | 1669155 | A   | T    | CDS     | 1656      | Tagatose 1,6-diphosphate aldolase                | Non      | Phe_F | Tyr_Y | Con      | 1              |
| 667 | 1669604 | G   | A    | CDS     | 1656      | Tagatose 1,6-diphosphate aldolase                | Syn      | Cys_C | Cys_C | --       | 1              |
| 668 | 1669949 | A   | G    | CDS     | 1657      | Tagatose-6-phosphate kinase                      | Syn      | Ile_I | Ile_I | --       | 1              |
| 669 | 1671163 | T   | C    | CDS     | 1658      | Galactose-6-phosphate isomerase, LacB subunit    | Non      | Arg_R | Gly_G | Rad      | 1              |
| 670 | 1671883 | A   | G    | CDS     | 1659      | Galactose-6-phosphate isomerase, LacA subunit    | Non      | Met_M | Thr_T | Con      | 5              |
| 671 | 1672060 | T   | A    | IG      | IG        | IG                                               | --       | --    | --    | --       | 11             |
| 672 | 1672204 | A   | T    | IG      | IG        | IG                                               | --       | --    | --    | --       | 1              |
| 673 | 1678204 | G   | C    | CDS     | 1667      | unknown function                                 | Syn      | Thr_T | Thr_T | --       | 17             |
| 674 | 1684826 | T   | G    | CDS     | 1676      | Polyribonucleotide nucleotidyltransferase        | Non      | STOP  | Ser_S | STOP     | 1              |
| 675 | 1686676 | G   | A    | CDS     | 1676      | Polyribonucleotide nucleotidyltransferase        | Syn      | Asp_D | Asp_D | --       | 1              |
| 676 | 1691812 | C   | T    | IG      | IG        | IG                                               | --       | --    | --    | --       | 2              |
| 677 | 1694199 | G   | A    | CDS     | 1685      | unknown function                                 | Non      | Ala_A | Val_V | Con      | 1              |
| 678 | 1697897 | T   | C    | CDS     | 1687      | DNA polymerase III                               | Non      | Glu_E | Gly_G | Con      | 1              |
| 679 | 1698882 | G   | A    | CDS     | 1687      | DNA polymerase III                               | Non      | Leu_L | Phe_F | Con      | 1              |
| 680 | 1698973 | C   | T    | CDS     | 1687      | DNA polymerase III                               | Syn      | Glu_E | Glu_E | --       | 1              |
| 681 | 1699412 | C   | T    | CDS     | 1687      | DNA polymerase III                               | Non      | Arg_R | His_H | Con      | 1              |
| 682 | 1700339 | G   | A    | CDS     | 1688      | Proyl-tRNA synthetase                            | Syn      | Phe_F | Phe_F | --       | 3              |
| 683 | 1703042 | C   | T    | IG      | IG        | IG                                               | --       | --    | --    | --       | 59             |
| 684 | 1703346 | T   | C    | CDS     | 1690      | Phosphatidate cytidyltransferase                 | Non      | Ile_I | Val_V | Con      | 1              |
| 685 | 1709402 | C   | A    | IG      | IG        | IG                                               | --       | --    | --    | --       | 1              |
| 686 | 1709912 | C   | T    | CDS     | 1695      | Glucan 1,6-alpha-glucosidase                     | Non      | Ala_A | Thr_T | Con      | 3              |
| 687 | 1712890 | G   | A    | CDS     | 1697      | Leucine rich protein                             | Non      | His_H | Tyr_Y | Con      | 1              |
| 688 | 1716146 | G   | C    | CDS     | 1701      | GTP pyrophosphokinase                            | Non      | Ala_A | Gly_G | Con      | 1              |
| 689 | 1716403 | A   | G    | CDS     | 1701      | GTP pyrophosphokinase                            | Syn      | Ile_I | Ile_I | --       | 59             |
| 690 | 1718958 | A   | G    | CDS     | 1703      | Collagen-like protein SclA                       | Syn      | Asn_N | Asn_N | --       | 1              |
| 691 | 1719733 | C   | T    | CDS     | 1704      | putative transposase - IS1548                    | Non      | Pro_P | Ser_S | Con      | 1              |
| 692 | 1721556 | C   | T    | IG      | IG        | IG                                               | --       | --    | --    | --       | 1              |

Table S2 cont.

| No. | Locus   | Ref | Test | CDS /IG | Locus Tag | Annotation                                          | Syn /Non | Ref   | Test  | Con /Rad | No. of Strains |
|-----|---------|-----|------|---------|-----------|-----------------------------------------------------|----------|-------|-------|----------|----------------|
| 693 | 1721852 | T   | C    | CDS     | 1707      | Exodeoxyribonuclease III                            | Non      | Asp_D | Gly_G | Con      | 1              |
| 694 | 1735135 | G   | A    | CDS     | 1719      | Dipeptide transport system protein dppB             | Non      | Ala_A | Thr_T | Con      | 1              |
| 695 | 1738301 | C   | T    | CDS     | 1723      | unknown function                                    | Non      | Glu_E | Lys_K | Con      | 1              |
| 696 | 1739068 | C   | T    | CDS     | 1724      | Streptococcal histidine triad protein               | Non      | Gly_G | Asp_D | Con      | 1              |
| 697 | 1742009 | C   | T    | CDS     | 1725      | Laminin-binding surface protein                     | Non      | Ala_A | Thr_T | Con      | 5              |
| 698 | 1742699 | A   | G    | CDS     | 1726      | C5a peptidase                                       | Non      | Val_V | Ala_A | Con      | 1              |
| 699 | 1742705 | T   | C    | CDS     | 1726      | C5a peptidase                                       | Non      | Asp_D | Gly_G | Con      | 1              |
| 700 | 1744981 | G   | A    | CDS     | 1726      | C5a peptidase                                       | Syn      | Ala_A | Ala_A | --       | 1              |
| 701 | 1745193 | G   | A    | CDS     | 1726      | C5a peptidase                                       | Non      | Pro_P | Ser_S | Con      | 1              |
| 702 | 1745700 | C   | T    | CDS     | 1726      | C5a peptidase                                       | Non      | Val_V | Ile_I | Con      | 1              |
| 703 | 1745873 | C   | T    | IG      | IG        | IG                                                  | --       | --    | --    | --       | 2              |
| 704 | 1745943 | G   | A    | IG      | IG        | IG                                                  | --       | --    | --    | --       | 4              |
| 705 | 1746410 | G   | A    | CDS     | 1727      | Antiphagocytic M protein                            | Non      | Thr_T | Ile_I | Con      | 6              |
| 706 | 1747604 | T   | C    | CDS     | 1727      | Antiphagocytic M protein                            | Non      | Asp_D | Gly_G | Con      | 2              |
| 707 | 1747652 | C   | T    | CDS     | 1727      | Antiphagocytic M protein                            | Non      | Gly_G | Asp_D | Con      | 1              |
| 708 | 1747653 | C   | T    | CDS     | 1727      | Antiphagocytic M protein                            | Non      | Gly_G | Ser_S | Con      | 3              |
| 709 | 1747683 | C   | T    | CDS     | 1727      | Antiphagocytic M protein                            | Non      | Asp_D | Asn_N | Con      | 1              |
| 710 | 1747692 | C   | G    | CDS     | 1727      | Antiphagocytic M protein                            | Non      | Gly_G | Arg_R | Rad      | 1              |
| 711 | 1747701 | C   | T    | CDS     | 1727      | Antiphagocytic M protein                            | Non      | Ala_A | Thr_T | Con      | 1              |
| 712 | 1747734 | T   | C    | CDS     | 1727      | Antiphagocytic M protein                            | Non      | Thr_T | Ala_A | Con      | 1              |
| 713 | 1747737 | A   | G    | CDS     | 1727      | Antiphagocytic M protein                            | Non      | Tyr_Y | His_H | Con      | 2              |
| 714 | 1747738 | T   | C    | CDS     | 1727      | Antiphagocytic M protein                            | Syn      | Leu_L | Leu_L | --       | 5              |
| 715 | 1747754 | T   | C    | CDS     | 1727      | Antiphagocytic M protein                            | Non      | Asp_D | Gly_G | Con      | 1              |
| 716 | 1747889 | G   | A    | CDS     | 1727      | Antiphagocytic M protein                            | Non      | Ala_A | Val_V | Con      | 1              |
| 717 | 1749825 | A   | G    | IG      | IG        | mga promoter                                        | --       | --    | --    | --       | 1              |
| 718 | 1749870 | T   | C    | IG      | IG        | mga promoter                                        | --       | --    | --    | --       | 23             |
| 719 | 1750069 | T   | G    | IG      | IG        | IG                                                  | --       | --    | --    | --       | 1              |
| 720 | 1755630 | G   | A    | CDS     | 1734      | ABC transporter permease protein                    | Non      | Pro_P | Ser_S | Con      | 1              |
| 721 | 1755860 | T   | C    | CDS     | 1735      | ABC transporter ATP-binding protein                 | Non      | Asp_D | Gly_G | Con      | 2              |
| 722 | 1760061 | G   | A    | CDS     | 1740      | Peptidylproline cis-trans-isomerase RopA            | Non      | Thr_T | Ile_I | Con      | 1              |
| 723 | 1761030 | G   | A    | IG      | IG        | IG                                                  | --       | --    | --    | --       | 3              |
| 724 | 1761173 | A   | C    | CDS     | 1741      | Streptopain inhibitor                               | Non      | Phe_F | Cys_C | Rad      | 3              |
| 725 | 1762318 | C   | A    | CDS     | 1742      | Streptococcal cysteine protease SpeB                | Non      | Gly_G | STOP  | STOP     | 1              |
| 726 | 1762807 | C   | T    | IG      | IG        | IG                                                  | --       | --    | --    | --       | 1              |
| 727 | 1762893 | T   | C    | CDS     | 1743      | unknown function                                    | Syn      | Leu_L | Leu_L | --       | 1              |
| 728 | 1763133 | T   | C    | IG      | IG        | IG                                                  | --       | --    | --    | --       | 1              |
| 729 | 1763553 | G   | A    | CDS     | 1744      | RopB; Rgg-like transcription regulator              | Non      | Val_V | Ile_I | Con      | 20             |
| 730 | 1763599 | G   | A    | CDS     | 1744      | RopB; Rgg-like transcription regulator              | Non      | Cys_C | Tyr_Y | Rad      | 1              |
| 731 | 1763788 | G   | A    | CDS     | 1744      | RopB; Rgg-like transcription regulator              | Non      | Cys_C | Tyr_Y | Rad      | 5              |
| 732 | 1763841 | C   | T    | CDS     | 1744      | RopB; Rgg-like transcription regulator              | Non      | Pro_P | Ser_S | Con      | 90             |
| 733 | 1763985 | A   | T    | CDS     | 1744      | RopB; Rgg-like transcription regulator              | Non      | Asn_N | Tyr_Y | Rad      | 1              |
| 734 | 1763996 | G   | A    | CDS     | 1744      | RopB; Rgg-like transcription regulator              | Non      | Met_M | Ile_I | Con      | 1              |
| 735 | 1764086 | T   | A    | CDS     | 1744      | RopB; Rgg-like transcription regulator              | Non      | Asn_N | Lys_K | Con      | 1              |
| 736 | 1764204 | T   | C    | CDS     | 1744      | RopB; Rgg-like transcription regulator              | Non      | Tyr_Y | His_H | Con      | 2              |
| 737 | 1764211 | G   | A    | CDS     | 1744      | RopB; Rgg-like transcription regulator              | Non      | Arg_R | Gln_Q | Con      | 2              |
| 738 | 1764244 | G   | T    | CDS     | 1744      | RopB; Rgg-like transcription regulator              | Non      | Gly_G | Val_V | Rad      | 1              |
| 739 | 1764267 | G   | A    | CDS     | 1744      | RopB; Rgg-like transcription regulator              | Non      | Ala_A | Thr_T | Con      | 1              |
| 740 | 1764337 | T   | G    | CDS     | 1744      | RopB; Rgg-like transcription regulator              | Non      | Phe_F | Cys_C | Rad      | 1              |
| 741 | 1771377 | C   | A    | CDS     | 1750      | PTS system, cellobiose-specific IIC                 | Non      | Ala_A | Ser_S | Con      | 1              |
| 742 | 1772884 | G   | A    | IG      | IG        | IG                                                  | --       | --    | --    | --       | 1              |
| 743 | 1779638 | G   | C    | CDS     | 1760      | unknown function                                    | Non      | Glu_E | Gln_Q | Con      | 1              |
| 744 | 1780162 | C   | T    | CDS     | 1761      | unknown function                                    | Non      | Ala_A | Val_V | Con      | 6              |
| 745 | 1790135 | G   | A    | CDS     | 1768      | Transcriptional regulator of class III stress genes | Syn      | Asp_D | Asp_D | --       | 2              |
| 746 | 1791355 | G   | A    | IG      | IG        | IG                                                  | --       | --    | --    | --       | 4              |
| 747 | 1794512 | C   | T    | CDS     | 1772      | Imidazolonepropionase                               | Non      | Ala_A | Thr_T | Con      | 3              |
| 748 | 1795623 | G   | A    | CDS     | 1773      | Urocanate hydratase                                 | Non      | Asp_D | Asn_N | Con      | 1              |
| 749 | 1796147 | G   | T    | CDS     | 1773      | Urocanate hydratase                                 | Non      | Met_M | Ile_I | Con      | 3              |
| 750 | 1798264 | A   | G    | CDS     | 1774      | Glutamate formiminotransferase                      | Non      | Asn_N | Ser_S | Con      | 1              |
| 751 | 1806778 | G   | A    | CDS     | 1781      | Transcriptional regulator, LuxR family              | Syn      | Gly_G | Gly_G | --       | 18             |
| 752 | 1812955 | A   | G    | CDS     | 1784      | Neutral endopeptidase O                             | Non      | Tyr_Y | His_H | Con      | 3              |
| 753 | 1815075 | C   | T    | IG      | IG        | IG                                                  | --       | --    | --    | --       | 3              |
| 754 | 1815253 | A   | T    | CDS     | 1786      | PTS system, trehalose-specific IIB component        | Non      | Tyr_Y | Asn_N | Rad      | 2              |

Table S2 cont.

| No. | Locus   | Ref | Test | CDS /IG | Locus Tag | Annotation                             | Syn /Non | Ref   | Test  | Con /Rad | No. of Strains |
|-----|---------|-----|------|---------|-----------|----------------------------------------|----------|-------|-------|----------|----------------|
| 755 | 1817279 | C   | T    | IG      | IG        | IG                                     | --       | --    | --    | --       | 5              |
| 756 | 1818197 | T   | C    | IG      | IG        | IG                                     | --       | --    | --    | --       | 3              |
| 757 | 1821510 | G   | A    | CDS     | 1792      | Acetyltransferase                      | Non      | Pro_p | Leu_L | Con      | 1              |
| 758 | 1823995 | T   | C    | CDS     | 1794      | Ribonucleotide reductase               | Non      | Asp_D | Gly_G | Con      | 1              |
| 759 | 1824906 | G   | A    | CDS     | 1794      | Ribonucleotide reductase               | Syn      | Asn_N | Asn_N | --       | 1              |
| 760 | 1829072 | T   | C    | IG      | IG        | IG                                     | --       | --    | --    | --       | 2              |
| 761 | 1834388 | A   | G    | CDS     | 1805      | DNA mismatch repair protein MutL       | Syn      | Ile_I | Ile_I | --       | 2              |
| 762 | 1838947 | A   | G    | CDS     | 1807      | biofilm formation protein YmcA         | Non      | Ser_S | Pro_P | Con      | 1              |
| 763 | 1839008 | C   | T    | IG      | IG        | IG                                     | --       | --    | --    | --       | 1              |
| 764 | 1841544 | G   | A    | CDS     | 1809      | Arginyl-tRNA synthetase                | Non      | Gly_G | Asp_D | Con      | 1              |
| 765 | 1841704 | C   | T    | CDS     | 1810      | unknown function                       | Syn      | Ser_S | Ser_S | --       | 20             |
| 766 | 1842608 | C   | T    | CDS     | 1811      | Transporter                            | Non      | Gly_G | Glu_E | Con      | 1              |
| 767 | 1850661 | A   | C    | CDS     | 1820      | unknown function                       | Non      | Thr_T | Pro_P | Con      | 2              |
| 768 | 1852034 | T   | C    | CDS     | 1822      | unknown function                       | Non      | Val_V | Ala_A | Con      | 1              |
| 769 | 1852385 | G   | A    | IG      | IG        | IG                                     | --       | --    | --    | --       | 2              |
| 770 | 1852396 | G   | A    | IG      | IG        | IG                                     | --       | --    | --    | --       | 2              |
| 771 | 1860162 | A   | G    | CDS     | 1832      | Transcriptional regulator, TetR family | Non      | Lys_K | Glu_E | Con      | 1              |
| 772 | 1865795 | T   | A    | CDS     | 1837      | Phosphoesterase, DHH family protein    | Non      | Leu_L | Phe_F | Con      | 1              |
| 773 | 1868362 | T   | C    | IG      | IG        | IG                                     | --       | --    | --    | --       | 24             |
| 774 | 1868487 | A   | G    | IG      | IG        | IG                                     | --       | --    | --    | --       | 1              |
| 775 | 1868573 | C   | T    | IG      | IG        | IG                                     | --       | --    | --    | --       | 1              |
| 776 | 1871539 | A   | G    | CDS     | 1842      | L-serine dehydratase                   | Non      | Thr_T | Ala_A | Con      | 1              |
| 777 | 1875003 | G   | A    | CDS     | 1845      | ATPase component of ECF transporters   | Non      | Thr_T | Met_M | Con      | 1              |
| 778 | 1875799 | G   | A    | CDS     | 1846      | ATPase component of ECF transporters   | Syn      | Asn_N | Asn_N | --       | 1              |
| 779 | 1875805 | T   | G    | CDS     | 1846      | ATPase component of ECF transporters   | Syn      | Gly_G | Gly_G | --       | 1              |
| 780 | 1876848 | A   | C    | CDS     | 1848      | Transcriptional regulator              | Syn      | Ser_S | Ser_S | --       | 1              |
| 781 | 1878245 | T   | C    | CDS     | 1849      | peptidase, M16 family                  | Non      | Asn_N | Ser_S | Con      | 1              |
| 782 | 1880381 | A   | T    | IG      | IG        | IG                                     | --       | --    | --    | --       | 1              |
| 783 | 1880442 | A   | G    | IG      | IG        | promoter of hasABC operon              | --       | --    | --    | --       | 1              |
| 784 | 1880446 | G   | T    | IG      | IG        | promoter of hasABC operon              | --       | --    | --    | --       | 1              |
| 785 | 1880453 | G   | A    | IG      | IG        | promoter of hasABC operon              | --       | --    | --    | --       | 2              |
| 786 | 1880456 | G   | T    | IG      | IG        | promoter of hasABC operon              | --       | --    | --    | --       | 1              |
| 787 | 1880457 | C   | T    | IG      | IG        | promoter of hasABC operon              | --       | --    | --    | --       | 2              |
| 788 | 1880458 | C   | T    | IG      | IG        | promoter of hasABC operon              | --       | --    | --    | --       | 1              |
| 789 | 1881838 | G   | A    | CDS     | 1852      | UDP-glucose dehydrogenase hasB         | Non      | Gly_G | Arg_R | Rad      | 10             |
| 790 | 1881840 | A   | T    | CDS     | 1852      | UDP-glucose dehydrogenase hasB         | Syn      | Gly_G | Gly_G | --       | 10             |
| 791 | 1881985 | T   | C    | CDS     | 1852      | UDP-glucose dehydrogenase hasB         | Syn      | Leu_L | Leu_L | --       | 1              |
| 792 | 1881986 | T   | G    | CDS     | 1852      | UDP-glucose dehydrogenase hasB         | Non      | Leu_L | STOP  | STOP     | 1              |
| 793 | 1882099 | G   | C    | CDS     | 1852      | UDP-glucose dehydrogenase hasB         | Non      | Glu_E | Gln_Q | Con      | 1              |
| 794 | 1882120 | C   | T    | CDS     | 1852      | UDP-glucose dehydrogenase hasB         | Non      | His_H | Tyr_Y | Con      | 1              |
| 795 | 1884495 | T   | G    | CDS     | 1854      | unknown function                       | Non      | Phe_F | Val_V | Con      | 1              |
| 796 | 1889178 | A   | G    | CDS     | 1858      | Tryptophanyl-tRNA synthetase           | Non      | Tyr_Y | His_H | Con      | 1              |
| 797 | 1891225 | C   | T    | IG      | IG        | IG                                     | --       | --    | --    | --       | 1              |
| 798 | 1896371 | C   | T    | CDS     | 1862      | putative transposase                   | Non      | Arg_R | Gln_Q | Con      | 8              |
| 799 | 1898296 | A   | G    | IG      | IG        | IG                                     | --       | --    | --    | --       | 1              |
| 800 | 1900461 | C   | T    | CDS     | 1865      | Chromosome partitioning protein ParB   | Non      | Leu_L | Phe_F | Con      | 1              |
| 801 | 1900477 | C   | T    | CDS     | 1865      | Chromosome partitioning protein ParB   | Non      | Ser_S | Phe_F | Rad      | 1              |

1. Abbreviations: Ref, reference strain MGAS315; CDS, coding sequence; IG, intergenic; Syn, synonymous; Non, nonsynonymous; Con, conservative amino acid change; Rad, radical amino acid change.

**Table S3. Nonsense single nucleotide polymorphisms inferred to cause prematurely terminated products.**

| Locus     | Gene<br>(SpyM3_) | Function                                                              | SNP  |      | Codon |      | Ref.<br>(aa) | Product      |                |
|-----------|------------------|-----------------------------------------------------------------------|------|------|-------|------|--------------|--------------|----------------|
|           |                  |                                                                       | Ref. | Test | Ref.  | Test |              | Test<br>(aa) | Truncated<br>% |
| 195,125   | 0164             | Multidrug resistance ABC transporter ATP-binding and permease protein | C    | T    | CAA   | TAA  | 594          | 457          | 23.1           |
| 283,739   | 0244             | TCS response regulator CovR/CsrR                                      | G    | T    | GAA   | TAA  | 228          | 36           | 84.2           |
| 284,064   | 0244             | TCS response regulator CovR/CsrR                                      | C    | A    | TCA   | TAA  | 228          | 144          | 36.8           |
| 284,614   | 0245             | TCS sensor kinase CovS/CsrS                                           | C    | T    | CGA   | TGA  | 500          | 97           | 80.6           |
| 284,719   | 0245             | TCS sensor kinase CovS/CsrS                                           | G    | T    | GAA   | TAA  | 500          | 132          | 73.6           |
| 350,013   | 0307             | Unknown function                                                      | C    | A    | GAA   | TAA  | 176          | 113          | 35.8           |
| 727,093   | --               | Unknown function                                                      | G    | A    | CGA   | TGA  | 95           | 19           | 80.0           |
| 832,888   | 0778             | Glutamine amidotransferase, class I                                   | A    | T    | TTA   | TAA  | 231          | 103          | 55.4           |
| 855,352   | 0804             | Pseudouridylate synthases, 23S RNA-specific                           | C    | T    | CAA   | TAA  | 325          | 184          | 43.4           |
| 872,314   | 0819             | Rossmann fold nucleotide-binding protein                              | C    | T    | CGA   | TGA  | 278          | 239          | 14.0           |
| 935,891   | 0877             | Phosphate transport ATP-binding protein PstB                          | A    | T    | TTA   | TAA  | 253          | 194          | 23.3           |
| 1,023,900 | 0982             | Maltose operon transcriptional repressor MalR                         | G    | A    | CAA   | TAA  | 339          | 153          | 54.9           |
| 1,051,686 | 1012             | Transposase                                                           | C    | T    | CAA   | TAA  | 268          | 21           | 92.2           |
| 1,094,245 | 1051             | Chloride channel protein                                              | G    | A    | TGG   | TAG  | 437          | 162          | 62.9           |
| 1,104,478 | 1061             | Major facilitator:Oxalate:Formate Antiporter                          | C    | T    | TGG   | TGA  | 398          | 38           | 90.5           |
| 1,296,749 | 1289             | Sugar-binding protein                                                 | C    | A    | GAA   | TAA  | 481          | 275          | 42.8           |
| 1,501,014 | 1509             | Guanine-hypoxanthine permease                                         | C    | A    | GAA   | TAA  | 486          | 322          | 33.7           |
| 1,583,782 | 1583             | Unknown function                                                      | C    | T    | TGG   | TAG  | 97           | 42           | 56.7           |
| 1,667,220 | 1654             | PTS system, lactose-specific IIB component                            | G    | A    | CAA   | TAA  | 565          | 461          | 18.4           |
| 1,762,318 | 1742             | Streptococcal cysteine protease SpeB (Streptopain)                    | C    | A    | GGA   | TGA  | 398          | 92           | 76.9           |
| 1,881,986 | 1852             | UDP-glucose dehydrogenase HasB                                        | T    | G    | TTA   | TGA  | 402          | 64           | 84.1           |



**Table S4. Insertions and deletions inferred to cause reading frame shifts resulting in prematurely terminated products.<sup>1</sup>**

| Locus   | Gene<br>(SpyM3_) | Function                                                         | Insertions and Deletions |          |              |      | Ref.<br>(aa) | Product     |              |                |
|---------|------------------|------------------------------------------------------------------|--------------------------|----------|--------------|------|--------------|-------------|--------------|----------------|
|         |                  |                                                                  | Indel                    | Sequence | Size<br>(nt) | Type |              | RFS<br>(aa) | Test<br>(aa) | Truncated<br>% |
| 9,109   | 0007             | Ribosome-associated heat shock protein                           | Ins                      | A        | 1            | HPNT | 90           | 69          | 73           | 18.9           |
| 45,781  | 0024             | IMP cyclohydrolase                                               | Del                      | --       | 42           | --   | 515          | 512         | 515          | 0.0            |
| 62,130  | 0037             | Alcohol dehydrogenase                                            | Ins                      | A        | 1            | HPNT | 338          | 184         | 186          | 45.0           |
| 130,209 | 0107             | Transcriptional regulator, LysR family                           | Ins                      | T        | 1            | HPNT | 303          | 137         | 159          | 47.5           |
| 236,940 | 0204             | Unknown function                                                 | Del                      | G        | 1            | HPNT | 641          | 521         | 571          | 10.9           |
| 283,972 | 0244             | TCS response regulator CovR/CsrR                                 | Ins                      | G        | 1            | --   | 228          | 113         | 122          | 46.5           |
| 284,344 | 0245             | TCS sensor kinase CovS/CsrS                                      | Ins                      | A        | 1            | HPNT | 500          | 7           | 11           | 97.8           |
| 284,405 | 0245             | TCS sensor kinase CovS/CsrS                                      | Del                      | T        | 1            | HPNT | 500          | 27          | 35           | 93.0           |
| 284,425 | 0245             | TCS sensor kinase CovS/CsrS                                      | Ins                      | --       | 11           | VNTR | 500          | 34          | 39           | 92.2           |
| 284,753 | 0245             | TCS sensor kinase CovS/CsrS                                      | Ins                      | C        | 1            | --   | 500          | 143         | 165          | 67.0           |
| 285,537 | 0245             | TCS sensor kinase CovS/CsrS                                      | Del                      | GAAAA    | 5            | VNTR | 500          | 405         | 407          | 18.6           |
| 302,388 | 0260             | Membrane protein                                                 | Ins                      | A        | 1            | --   | 229          | 224         | 228          | 0.4            |
| 358,676 | 0317             | Metal transporter of streptococcus regulator MtsR                | Ins                      | T        | 1            | HPNT | 215          | 5           | 13           | 94.0           |
| 373,410 | 0332             | 67kDa Myosin-crossreactive streptococcal antigen                 | Del                      | T        | 1            | HPNT | 590          | 499         | 565          | 4.2            |
| 423,167 | 0378             | Shikimate 5-dehydrogenase                                        | Del                      | T        | 1            | HPNT | 290          | 271         | 277          | 4.5            |
| 425,140 | 0381             | Unknown function                                                 | Ins                      | A        | 1            | HPNT | 328          | 117         | 121          | 63.1           |
| 426,253 | 0382             | Archaeal S-adenosylmethionine synthetase                         | Del                      | C        | 1            | HPNT | 399          | 156         | 164          | 58.9           |
| 428,141 | 0384             | Dolichyl-phosphate transferase, involved in cell wall biogenesis | Del                      | T        | 1            | HPNT | 329          | 50          | 50           | 84.8           |
| 431,132 | 0386             | ABC transporter membrane-spanning permease - macrolide efflux    | Del                      | A        | 1            | HPNT | 391          | 62          | 75           | 80.8           |
| 435,966 | 0394             | Plasmid stabilization system toxin protein                       | Ins                      | A        | 1            | HPNT | 101          | 74          | 85           | 15.8           |
| 438,538 | 0398             | Probable transposase TnpA                                        | Del                      | T        | 1            | HPNT | 106          | 95          | 104          | 1.9            |
| 444,105 | 0403             | Beta-glucoside bgl operon antiterminator, BglG family            | Ins                      | A        | 1            | HPNT | 280          | 34          | 37           | 86.8           |
| 450,256 | 0408             | Unknown function                                                 | Del                      | T        | 1            | HPNT | 65           | 51          | 53           | 18.5           |
| 493,748 | 0450             | 2-dehydro-3-deoxygluconate kinase                                | Del                      | T        | 1            | HPNT | 333          | 31          | 42           | 87.4           |
| 501,845 | 0457             | Hydroxyacylglutathione hydrolase                                 | Del                      | A        | 1            | HPNT | 232          | 9           | 13           | 94.4           |
| 520,333 | 0473             | Chloride channel protein                                         | Ins                      | A        | 1            | --   | 420          | 268         | 279          | 33.6           |
| 520,439 | 0473             | Chloride channel protein                                         | Del                      | A        | 1            | HPNT | 420          | 304         | 304          | 27.6           |
| 624,022 | 0566             | Glycerophosphoryl diester phosphodiesterase                      | Del                      | A        | 1            | HPNT | 577          | 475         | 532          | 7.8            |
| 651,248 | 0591             | 5'-nucleotidase                                                  | Del                      | C        | 1            | HPNT | 670          | 182         | 188          | 71.9           |
| 652,457 | 0592             | GTP pyrophosphokinase                                            | Del                      | A        | 1            | HPNT | 216          | 147         | 152          | 29.6           |
| 665,479 | 0606             | Unknown function                                                 | Ins                      | A        | 1            | --   | 248          | 74          | 75           | 69.8           |
| 665,981 | 0606             | Unknown function                                                 | Ins                      | AA       | 2            | HPNT | 248          | 241         | 247          | 0.4            |
| 695,107 | 0633             | Unknown function                                                 | Del                      | T        | 1            | HPNT | 58           | 31          | 55           | 5.2            |

Table S4 cont.

| Locus     | Gene<br>(SpyM3_) | Function                                                  | Insertions and Deletions |          |              |      | Product      |             |              |                |
|-----------|------------------|-----------------------------------------------------------|--------------------------|----------|--------------|------|--------------|-------------|--------------|----------------|
|           |                  |                                                           | Indel                    | Sequence | Size<br>(nt) | Type | Ref.<br>(aa) | RFS<br>(aa) | Test<br>(aa) | Truncated<br>% |
| 712,189   | 0651             | TPR-repeat-containing protein                             | Ins                      | T        | 1            | HPNT | 415          | 204         | 204          | 50.8           |
| 791,356   | 0738             | Streptococcal collagen-like protein ScIB                  | Del                      | CAAAA    | 5            | VNTR | 573          | 8           | 9            | 98.4           |
| 856,016   | 0805             | Pneumococcal vaccine antigen A homolog                    | Del                      | A        | 1            | HPNT | 199          | 79          | 92           | 53.8           |
| 857,798   | 0806             | ABC transporter, ATP-binding/permease protein             | Del                      | T        | 1            | HPNT | 536          | 432         | 439          | 18.1           |
| 877,877   | 0823             | Unknown function                                          | Del                      | A        | 1            | HPNT | 104          | 42          | 59           | 43.3           |
| 903,155   | 0847             | ABC transporter ATP-binding protein                       | Ins                      | T        | 1            | HPNT | 514          | 294         | 295          | 42.6           |
| 927,833   | 0870             | 16S rRNA m(2)G 1207 methyltransferase                     | Del                      | T        | 1            | HPNT | 197          | 161         | 181          | 8.1            |
| 1,064,894 | 1025             | Putative PBP 5 synthesis repressor                        | Del                      | T        | 1            | HPNT | 483          | 37          | 37           | 92.3           |
| 1,070,306 | 1031             | Ribosomal-protein-S5p-alanine acetyltransferase           | Del                      | T        | 1            | HPNT | 180          | 148         | 153          | 15.0           |
| 1,104,584 | 1061             | Major facilitator:Oxalate:Formate Antiporter              | Ins                      | T        | 1            | HPNT | 398          | 5           | 30           | 92.5           |
| 1,135,220 | 1092             | Unknown function                                          | Del                      | TTCTATTT | 8            | VNTR | 57           | 17          | 24           | 57.9           |
| 1,185,432 | 1159             | Deoxyribodipyrimidine photolyase                          | Del                      | T        | 1            | HPNT | 469          | 116         | 171          | 63.5           |
| 1,188,542 | 1163             | ATP-dependent Clp protease, ATP-binding subunit ClpE      | Ins                      | A        | 1            | HPNT | 760          | 181         | 183          | 75.9           |
| 1,380,210 | 1377             | Transcriptional regulators, LysR family                   | Ins                      | T        | 1            | HPNT | 329          | 73          | 77           | 76.6           |
| 1,462,554 | 1468             | Glycerol kinase                                           | Del                      | --       | 19           | VNTR | 508          | 296         | 316          | 37.8           |
| 1,550,607 | 1558             | Heme ABC transporter (Streptococcus), ATP-binding protein | Del                      | A        | 1            | HPNT | 278          | 112         | 127          | 54.3           |
| 1,610,634 | 1608             | DNA polymerase III alpha subunit                          | Del                      | C        | 1            | HPNT | 208          | 38          | 69           | 66.8           |
| 1,755,860 | 1735             | ABC transporter ATP-binding protein                       | Del                      | T        | 1            | --   | 224          | 221         | 222          | 0.9            |
| 1,881,860 | 1852             | UDP-glucose dehydrogenase HasB                            | Ins                      | T        | 1            | --   | 402          | 22          | 28           | 93.0           |
| 1,881,975 | 1852             | UDP-glucose dehydrogenase HasB                            | Ins                      | A        | 1            | --   | 402          | 60          | 61           | 84.8           |

1. Abbreviations: Ref, reference strain MGAS315; RFS, reading frame shift; Ins, insertion; Del, deletion; HPNT, homopolymeric nucleotide tract; VNTR, variable number tandem repeat.

**Table S6. Core genes significantly overabundant in single nucleotide polymorphisms.**

| Locus Tag  | Gene             | Function                                                 | Size (bp) | Exp. SNPs <sup>1</sup> |           | Obs. SNPs | $\chi^2$ | $P^2$                  | $P_{Bon}^3$            | $P_{B\&H}^4$           |
|------------|------------------|----------------------------------------------------------|-----------|------------------------|-----------|-----------|----------|------------------------|------------------------|------------------------|
|            |                  |                                                          |           | $n = 1$                | $n = 801$ |           |          |                        |                        |                        |
| SpyM3_1744 | <i>ropB/rgg</i>  | Rgg-like transcription regulator                         | 843       | 0.000506               | 0.405     | 12        | 331.58   | $4.36 \times 10^{-74}$ | $6.75 \times 10^{-71}$ | $6.75 \times 10^{-71}$ |
| SpyM3_1017 | IS904_A          | transposase ORF-A                                        | 324       | 0.000195               | 0.156     | 6         | 219.18   | $1.36 \times 10^{-49}$ | $2.11 \times 10^{-46}$ | $1.06 \times 10^{-46}$ |
| SpyM3_0245 | <i>covS/csrS</i> | TCS sensor histidine kinase                              | 1503      | 0.000902               | 0.723     | 13        | 208.52   | $2.90 \times 10^{-47}$ | $4.49 \times 10^{-44}$ | $1.50 \times 10^{-44}$ |
| SpyM3_1727 | <i>emm3</i>      | antiphagocytic M protein                                 | 1746      | 0.001048               | 0.840     | 12        | 148.32   | $4.03 \times 10^{-34}$ | $6.25 \times 10^{-31}$ | $1.56 \times 10^{-31}$ |
| SpyM3_0244 | <i>covR/csrR</i> | TCS response regulator                                   | 687       | 0.000412               | 0.330     | 6         | 97.29    | $6.00 \times 10^{-23}$ | $9.30 \times 10^{-20}$ | $1.86 \times 10^{-20}$ |
| SpyM3_1012 | IS861A           | transposase ORF-A                                        | 807       | 0.000485               | 0.388     | 5         | 54.80    | $1.33 \times 10^{-13}$ | $2.07 \times 10^{-10}$ | $3.44 \times 10^{-11}$ |
| SpyM3_1655 | <i>lacF</i>      | phosphotransferase system lactose specific IIA component | 318       | 0.000191               | 0.153     | 3         | 53.00    | $3.34 \times 10^{-13}$ | $5.17 \times 10^{-10}$ | $7.38 \times 10^{-11}$ |
| SpyM3_1852 | <i>hasB</i>      | HA capsule synthesis UDP-glucose dehydrogenase           | 1209      | 0.000726               | 0.581     | 6         | 50.49    | $1.20 \times 10^{-12}$ | $1.85 \times 10^{-9}$  | $2.31 \times 10^{-10}$ |
| SpyM3_1527 | <i>fabH</i>      | fatty acid biosynthesis H, beta-keto-acyl-ACP synthase   | 975       | 0.000585               | 0.469     | 5         | 43.78    | $3.76 \times 10^{-11}$ | $5.68 \times 10^{-8}$  | $6.32 \times 10^{-9}$  |
| SpyM3_1466 | <i>glpF.1</i>    | glycerol uptake facilitator protein                      | 702       | 0.000422               | 0.338     | 4         | 39.73    | $2.92 \times 10^{-10}$ | $4.52 \times 10^{-7}$  | $4.52 \times 10^{-8}$  |
| SpyM3_1011 | IS861B           | transposase ORF-B                                        | 468       | 0.000281               | 0.225     | 3         | 34.21    | $4.95 \times 10^{-9}$  | $7.66 \times 10^{-6}$  | $6.97 \times 10^{-7}$  |
| SpyM3_0987 | --               | transposase                                              | 246       | 0.000148               | 0.118     | 2         | 29.93    | $4.49 \times 10^{-8}$  | $6.95 \times 10^{-5}$  | $5.79 \times 10^{-6}$  |
| SpyM3_1160 | <i>glnQ</i>      | glutamine transport ATP-binding protein                  | 735       | 0.000441               | 0.353     | 3         | 19.81    | $8.54 \times 10^{-6}$  | $1.32 \times 10^{-2}$  | $1.02 \times 10^{-3}$  |
| SpyM3_0674 | --               | fatty acid biosynthesis A-like, acyl-ACP thioesterase    | 753       | 0.000452               | 0.362     | 3         | 19.21    | $1.17 \times 10^{-5}$  | $1.81 \times 10^{-2}$  | $1.29 \times 10^{-3}$  |
| SpyM3_0819 | <i>smf</i>       | Smf family DNA processing protein                        | 837       | 0.000503               | 0.403     | 3         | 16.76    | $4.24 \times 10^{-5}$  | $6.57 \times 10^{-2}$  | $4.38 \times 10^{-3}$  |
| SpyM3_1509 | --               | guanine-hypoxanthine permease                            | 1461      | 0.000877               | 0.703     | 4         | 15.47    | $8.37 \times 10^{-5}$  | $1.30 \times 10^{-1}$  | $8.10 \times 10^{-3}$  |
| SpyM3_0085 | --               | adenine-specific methyltransferase                       | 954       | 0.000573               | 0.459     | 1         | 14.07    | $1.76 \times 10^{-4}$  | $2.72 \times 10^{-1}$  | $1.60 \times 10^{-2}$  |
| SpyM3_0353 | <i>smpB</i>      | binds to tmRNA, required for ribosome binding            | 468       | 0.000281               | 0.225     | 2         | 14.00    | $1.83 \times 10^{-4}$  | $2.84 \times 10^{-1}$  | $1.58 \times 10^{-2}$  |
| SpyM3_1488 | --               | phosphotransferase system IIA component                  | 474       | 0.000285               | 0.228     | 1         | 13.77    | $2.06 \times 10^{-4}$  | $3.19 \times 10^{-1}$  | $1.68 \times 10^{-2}$  |
| SpyM3_0738 | <i>sclB</i>      | streptococcal collagen-like protein B                    | 1722      | 0.001034               | 0.828     | 3         | 12.15    | $4.92 \times 10^{-4}$  | $7.61 \times 10^{-1}$  | $3.81 \times 10^{-2}$  |
| SpyM3_0999 | --               | hypothetical protein of unknown function                 | 153       | 0.000092               | 0.074     | 3         | 11.66    | $6.37 \times 10^{-4}$  | $9.87 \times 10^{-1}$  | $4.70 \times 10^{-2}$  |
| SpyM3_0011 | <i>hpt</i>       | hypoxanthine-guanine phosphoribosyltransferase           | 543       | 0.000326               | 0.261     | 1         | 11.58    | $6.67 \times 10^{-4}$  | 1.03                   | $4.70 \times 10^{-2}$  |

1. The mean chance expectation for a polymorphism occurring in a given gene for a single mutation event is the size of the gene relative to the core genome (for *ropB*, 843 bp/ 1,665,462 bp = 0.000506), and for multiple events, is the expectation for a single event multiplied by the number of total events (for *ropB*,  $0.000506 \times 801 = 0.405$ ).

2. Chi square probability for one degree of freedom.

3. Probability corrected for multiple tests ( $n = 1549$ ) by the method of Bonferroni (uncorrected probability multiplied by the number of tests).

4. Probability corrected for multiple tests ( $n = 1549$ ) by the method of Benjamini and Hochberg (uncorrected probability multiplied by the number of tests divided by the rank).

**Table S5. Single nucleotide polymorphism accretion rate estimation.**

| <b>Progenitor-Descendant CC Pairs Compared<sup>1</sup></b>                                                 | <b>Genetic Distance Between Strains (<math>\Delta nt</math>)<sup>2</sup></b> |                          |
|------------------------------------------------------------------------------------------------------------|------------------------------------------------------------------------------|--------------------------|
|                                                                                                            | <b>~5yr</b>                                                                  | <b>~1yr</b>              |
| <b>Subclones (Epidemic)<br/>Clonal complexes<br/>Number of sequenced strains<br/>Number of comparisons</b> | <b>Range<br/>Mean<br/>Net Mean</b>                                           | <b>Mean<br/>Net Mean</b> |
| SC5 (II) $\leftrightarrow$ SC8 (III)<br>CC2 $\leftrightarrow$ CC3<br>$n = 7 \leftrightarrow n = 5$<br>35   | 13 $\leftrightarrow$ 33<br>20.429<br>9.724                                   | 4.086<br>1.945           |
| SC5 (II) $\leftrightarrow$ SC5 (III)<br>CC2 $\leftrightarrow$ CC5<br>$n = 7 \leftrightarrow n = 3$<br>21   | 6 $\leftrightarrow$ 42<br>20.095<br>1.525                                    | 4.419<br>0.305           |
| SC1 (II) $\leftrightarrow$ SC9 (III)<br>CC7 $\leftrightarrow$ CC6<br>$n = 3 \leftrightarrow n = 6$<br>18   | 18 $\leftrightarrow$ 45<br>32.833<br>11.265                                  | 6.567<br>2.253           |
| SC3 (I) $\leftrightarrow$ SC3 (II)<br>CC12 $\leftrightarrow$ CC13<br>$n = 7 \leftrightarrow n = 5$<br>35   | 12 $\leftrightarrow$ 30<br>19.943<br>11.467                                  | 3.989<br>2.293           |

1. Progenitor-descendant clonal complex pairs were identified based on relationships in the 280 sequence-validated SNP neighbor-joining tree (Fig. 3B).
2. Genetic distance between strains, mean SNPs and net mean SNPs between clonal complexes were determined using Molecular Evolutionary Genetic Analysis (MEGA) software ([www.megasoftware.net](http://www.megasoftware.net)).

Estimated mean SNPs accumulated per strain per year :

$$(4.086 + 4.419 + 6.567 + 3.989) / 4 = \underline{4.765}$$

Estimated net mean SNPs accumulated per strain per year :

$$(1.945 + 0.305 + 2.253 + 2.293) / 4 = \underline{1.699}$$

**Table S7. GAS serotype M3 SLVG clonal complexes and invasive disease types associations.<sup>1</sup>**

| SLVG<br>CC               | <u>ART</u><br>(n = 35) |                              | <u>BAC</u><br>(n = 54) |                              | <u>LRT</u><br>(n = 53) |                              | <u>NF</u><br>(n = 52) |                              | <u>STI</u><br>(n = 77) |                              | <u>URT</u><br>(n = 17) |                              | <u>Other</u><br>(n = 55) |                 |
|--------------------------|------------------------|------------------------------|------------------------|------------------------------|------------------------|------------------------------|-----------------------|------------------------------|------------------------|------------------------------|------------------------|------------------------------|--------------------------|-----------------|
|                          | Obs                    | Exp <sup>2</sup><br>P        | Obs                    | Exp<br>P                     | Obs                    | Exp<br>P                     | Obs                   | Exp<br>P                     | Obs                    | Exp<br>P                     | Obs                    | Exp<br>P                     | Obs                      | Exp<br>P        |
| <b>1</b><br>(n = 20)     | 4                      | 2.03<br>0.0924               | 3                      | 3.14<br>0.6139               | 2                      | 3.08<br>0.3788               | 2                     | 3.02<br>0.3930               | 3                      | 4.48<br>0.3071               | <b>4</b>               | <b>0.99</b><br><b>0.0106</b> | 2                        | 3.26<br>0.3383  |
| <b>2</b><br>(n = 36)     | 4                      | 3.66<br>0.4769               | <b>12</b>              | <b>5.65</b><br><b>0.0046</b> | 6                      | 5.55<br>0.4996               | <b>0</b>              | <b>5.44</b><br><b>0.0019</b> | 8                      | 8.06<br>0.5857               | 2                      | 1.78<br>0.4372               | 4                        | 5.86<br>0.2669  |
| <b>3</b><br>(n = 10)     | 1                      | 1.02<br>0.7298               | 1                      | 1.57<br>0.5167               | 1                      | 1.54<br>0.5273               | 3                     | 1.51<br>0.1317               | 1                      | 2.24<br>0.3042               | 0                      | 0.49<br>0.5982               | 3                        | 1.63<br>0.1499  |
| <b>4</b><br>(n = 2)      | 0                      | 0.2<br>0.8066                | 0                      | 0.31<br>0.7103               | 1                      | 0.31<br>0.2848               | 0                     | 0.3<br>0.7202                | 0                      | 0.45<br>0.6019               | 0                      | 0.1<br>0.9035                | 1                        | 0.33<br>0.2995  |
| <b>5</b><br>(n = 14)     | 0                      | 1.42<br>0.2159               | 4                      | 2.2<br>0.1970                | 2                      | 2.16<br>0.6312               | 1                     | 2.12<br>0.3467               | 3                      | 3.13<br>0.6149               | 1                      | 0.69<br>0.3676               | 3                        | 2.28<br>0.5305  |
| <b>6</b><br>(n = 14)     | 0                      | 1.42<br>0.2159               | 1                      | 2.2<br>0.3246                | 2                      | 2.16<br>0.6312               | 1                     | 2.12<br>0.3467               | 3                      | 3.13<br>0.6149               | 0                      | 0.69<br>0.4850               | 7                        | 2.28<br>0.0029  |
| <b>7</b><br>(n = 8)      | <b>3</b>               | <b>0.81</b><br><b>0.0332</b> | 1                      | 1.26<br>0.6347               | 0                      | 1.23<br>0.2583               | 2                     | 1.21<br>0.2419               | 2                      | 1.79<br>0.7438               | 0                      | 0.4<br>0.6638                | 0                        | 1.3<br>0.2375   |
| <b>8</b><br>(n = 19)     | 1                      | 1.93<br>0.4034               | 4                      | 2.98<br>0.3551               | 3                      | 2.93<br>0.6671               | 2                     | 2.87<br>0.4305               | 4                      | 4.25<br>0.5738               | 0                      | 0.94<br>0.3717               | 5                        | 3.09<br>0.1416  |
| <b>9</b><br>(n = 12)     | 0                      | 1.22<br>0.2699               | 3                      | 1.88<br>0.3095               | 2                      | 1.85<br>0.7233               | 4                     | 1.81<br>0.0682               | 2                      | 2.69<br>0.4733               | 0                      | 0.59<br>0.5388               | 1                        | 1.95<br>0.3910  |
| <b>10</b><br>(n = 4)     | 0                      | 0.41<br>0.6497               | 0                      | 0.63<br>0.5034               | <b>3</b>               | <b>0.62</b><br><b>0.0124</b> | 1                     | 0.6<br>0.3725                | 0                      | 0.9<br>0.3611                | 0                      | 0.2<br>0.8158                | 0                        | 0.65<br>0.4896  |
| <b>11</b><br>(n = 11)    | 0                      | 1.12<br>0.3016               | 4                      | 1.73<br>0.0591               | 1                      | 1.69<br>0.4738               | 2                     | 1.66<br>0.4527               | 1                      | 2.46<br>0.2524               | 0                      | 0.54<br>0.5678               | 3                        | 1.79<br>0.3106  |
| <b>12</b><br>(n = 14)    | 1                      | 1.42<br>0.5733               | 3                      | 2.2<br>0.3065                | 3                      | 2.16<br>0.3069               | 4                     | 2.12<br>0.1970               | 3                      | 3.13<br>0.6149               | 0                      | 0.69<br>0.4850               | 0                        | 2.28<br>0.0788  |
| <b>13</b><br>(n = 20)    | 3                      | 2.03<br>0.3086               | 2                      | 3.14<br>0.3650               | 3                      | 3.08<br>0.6285               | 4                     | 3.02<br>0.3524               | 6                      | 4.48<br>0.2772               | 2                      | 0.99<br>0.1913               | 0                        | 3.26<br>0.0256  |
| <b>14</b><br>(n = 17)    | 3                      | 1.73<br>0.3159               | 0                      | 2.67<br>0.0508               | 5                      | 2.62<br>0.1245               | 5                     | 2.57<br>0.1240               | 2                      | 3.81<br>0.2249               | 1                      | 0.84<br>0.3843               | 1                        | 2.77<br>0.2027  |
| <b>15</b><br>(n = 6)     | 1                      | 0.61<br>0.3611               | 2                      | 0.94<br>0.1875               | 1                      | 0.92<br>0.7677               | 0                     | 0.91<br>0.3711               | 0                      | 1.34<br>0.2159               | 0                      | 0.3<br>0.7361                | 2                        | 0.98<br>0.1963  |
| <b>16</b><br>(n = 10)    | 0                      | 1.02<br>0.3369               | <b>4</b>               | <b>1.57</b><br><b>0.0443</b> | <b>5</b>               | <b>1.54</b><br><b>0.0099</b> | 0                     | 1.51<br>0.1896               | 0                      | 2.24<br>0.0763               | 0                      | 0.49<br>0.5982               | 1                        | 1.63<br>0.4957  |
| <b>17</b><br>(n = 9)     | 1                      | 0.92<br>0.7698               | 1                      | 1.41<br>0.5742               | 0                      | 1.39<br>0.2176               | 2                     | 1.36<br>0.4893               | 1                      | 2.01<br>0.3644               | 1                      | 0.44<br>0.3023               | 3                        | 1.47<br>0.1246  |
| <b>18</b><br>(n = 10)    | 1                      | 1.02<br>0.7298               | 0                      | 1.57<br>0.1768               | 0                      | 1.54<br>0.1831               | 0                     | 1.51<br>0.1896               | <b>5</b>               | <b>2.24</b><br><b>0.0486</b> | 1                      | 0.49<br>0.3198               | 3                        | 1.63<br>0.1499  |
| <b>19</b><br>(n = 29)    | 3                      | 2.95<br>0.6609               | 4                      | 4.55<br>0.5098               | 2                      | 4.47<br>0.1427               | 6                     | 4.38<br>0.2866               | 10                     | 6.49<br>0.0719               | 0                      | 1.43<br>0.2155               | 4                        | 4.72<br>0.4739  |
| <b>20</b><br>(n = 10)    | 2                      | 1.02<br>0.1998               | 0                      | 1.57<br>0.1768               | 1                      | 1.54<br>0.5273               | 1                     | 1.51<br>0.5381               | 3                      | 2.24<br>0.5356               | 1                      | 0.49<br>0.3198               | 2                        | 1.63<br>0.4573  |
| <b>21</b><br>(n = 3)     | 0                      | 0.31<br>0.7241               | 0                      | 0.47<br>0.5981               | 0                      | 0.46<br>0.6044               | 0                     | 0.45<br>0.6107               | <b>3</b>               | <b>0.67</b><br><b>0.0109</b> | 0                      | 0.15<br>0.8586               | 0                        | 0.49<br>0.5858  |
| <b>Other</b><br>(n = 66) | 7                      | 6.72<br>0.4753               | 5                      | 10.36<br>0.0278              | 10                     | 10.17<br>0.5605              | 12                    | 9.98<br>0.2801               | 17                     | 14.77<br>0.3272              | 4                      | 3.26<br>0.5409               | 11                       | 10.74<br>0.6194 |

1. Abbreviations: ART, arthritis; BAC, bacteremia; LRT, lower respiratory tract; NF, necrotizing fasciitis; STI, soft tissue infection; URT, upper respiratory tract; SLVG, single locus variant group; CC, clonal complex Obs, observed; Exp, expected; P, probability.

2. Expected values for a given infection type are based on the relative proportion of that infection type to all invasive cases in the study set. For CC2 and NF, the relative proportion of NF is 52/344 = 0.151 and for CC2 the expected number of NF cases is 36 × 0.151 = 5.4.

**Table S8. Primers used for mass spectroscopy based single nucleotide polymorphism analysis.<sup>1</sup>**

| No. | Locus  | Amplification Primer 1 | Amplification Primer 2 | Single Base Extension Primer |
|-----|--------|------------------------|------------------------|------------------------------|
| 1   | 1850   | GCCATTCCTATTCTTTCATC   | GATATTTGACCGTTAGACCC   | GACAGTTACTCCTGTAGGAGTGACTT   |
| 2   | 10114  | GCCATTTGAGTGGCATGAAC   | CTTAGGCTTTATTTCAGCCCC  | CTAGGTACGCAAACAATTCCTTCTTCT  |
| 3   | 16387  | GGCAATAGCAAAAGCAATCC   | CCATTCCTACCAATGTTGGC   | GGTTGGCAATTATCATTTGTCT       |
| 4   | 37285  | GGATATTGCAGAAGCAGAGC   | GCGGCAAAGTAATGTCCTTG   | AATCAACAGGGTTCAAAAGA         |
| 5   | 44364  | ATCTCTGGGAATCCAGTCAC   | AACTGGTGGGACTAAGGTTG   | CCGAAGGTTGCCCTTGATAA         |
| 6   | 45232  | TAGCTAGCGCTTCTTCTGAG   | CGACAGCTAAGAAGATGCAC   | CACCCTATCTTCTTGAAATCATCATC   |
| 7   | 46653  | GACCGTAAGCAGCATTGAC    | GCGAAAAATCAGGGTTATCC   | ATCCTGTGAATAAGACACCAA        |
| 8   | 48112  | GAGTTCAACTCACGTTTCGG   | GAGCGAAATCAGAAGTCAGG   | AGTCAGGCGAGGGAGGATAA         |
| 9   | 61350  | ACTACATTTTCTGACACTGG   | CCAGGACGACGTAAGTGATT   | TTTTAATGTTGATACCAGGAAAT      |
| 10  | 66294  | GACTTCTCAGTGATAACTGG   | CGTGAACGCAGACAACTTC    | GGACAATTGAGGAGGTTCTT         |
| 11  | 67203  | GATACCTTTCCAACGGCTAC   | TACATGCCGTGCAACTATCG   | ACTATCGGTACTGTTGGTAA         |
| 12  | 67875  | ACGAGCCATTGCTTTAGCTG   | GCAGCTGACGACAAGAAAAC   | TTCGTTAATAGGAGGAGGA          |
| 13  | 79640  | CCTCCAAATTTAAAAGAGGAT  | TGCATCGCAAACAGATGCTC   | CAAACCTATATTGTTAGTTTTATCCC   |
| 14  | 93041  | AGAACCTGGCGATCTAACTG   | GTGTTAGGTTTTGTTGGTGG   | ATTTGTTGGTGGTAGAGATTA        |
| 15  | 98549  | TTTGTGCTAAGATGGGTGC    | ATTTCAGCGATTTTCAGCTGCC | TATGCCAAGTCCACACGTT          |
| 16  | 107126 | ACAGCTTCTGTATGATCGTG   | CGTATCGGTCTCAAGGATTC   | TTGGCAAAAAAGAAGAGC           |
| 17  | 113828 | GTCATTAGCGTACTGTTTCG   | TGCCAAAGTTCGTGGTGCTG   | TTAGACTCTAGCTGAGGTT          |
| 18  | 118018 | TCTGACTTGGATGGAAAGTG   | GCTACCCAGACTATAGTCCG   | AGATGGAAGTAAGGAGTATCAAG      |
| 19  | 119965 | GGCTATTTGGTCGTAAAGGG   | GCTTTCAATAGTGGATTCTC   | CTCGCATTTAAGCGATTTAGGTAATT   |
| 20  | 130696 | CCTCTTTTCGATAACGTTTAG  | CACCACTTCTTTAGTCATAG   | CTTTTTTCATTATTGAAACGCTTAC    |
| 21  | 131210 | GGGTTGAGTGATGCTTTTGC   | CTTCTCTGGTCAGTCCATAC   | GGTGCACAATATTTTCGGCTGTT      |
| 22  | 131636 | CATCAATTGTCAGCTGAGCC   | GACCCAAGTATTATGGGCTG   | CCCCCTACCTGCTACGAAAAAGG      |
| 23  | 139513 | GTTGGCATCGCTAGTCAAAC   | AAGAAGAAAGCTCCCGCATC   | CTCCCGCATCATTTGATA           |
| 24  | 144672 | CATGTCCAGTCTAATACGGC   | GTCCATCTCACTATTTGAGC   | ACCTCACTATTTGAGCTGAGGT       |
| 25  | 157102 | AATAGCAGCCATACCAGATG   | CTGAAGCTTTAGAAGACGGG   | GACTGTTTAGAAAAAGCGACTTAT     |
| 26  | 163387 | CCTGCCAAAGTCCATAAGAG   | GCATTCAAGTCCATACCTTC   | GATCTTTAGATTCTTCTACCATTT     |
| 27  | 164253 | GTCTTTTGCAAATTGCAAGCG  | TTTATGGCGCGTCCATTGG    | CAGCAACGCCAAAACAGTTTA        |
| 28  | 170064 | AACACGCTGCTGCATCCAC    | CCAGCGATTGGCAGAAAAAG   | TTAAAGACCAGTACCCAAA          |
| 29  | 183592 | GTGTTTTTAGCTATGGAAG    | CATTTTCATAATCGCATGGG   | TCTTTTAAATTTTCATCTGCATAAG    |
| 30  | 184244 | CTCATGCTATCTTCTTAAC    | CTTAAAAACGTACTAGTGC    | TAAAAACGTACTAGTGCTATTTCTC    |
| 31  | 186843 | TGACGGCCTGTGTCATAAAG   | TCAAGGCAACATGCTACTAC   | CATGCTACTACTAGATAAGCTTGAAA   |
| 32  | 195125 | GTCATGAATATGGGTGCGAC   | ATTCGTTTTGGTGATCAGAC   | TTGGTGATCAGACCATTAGT         |
| 33  | 201055 | GGAAATCTTCTCTCGTGAGC   | TTCTGGTCAAAGGCAGCTGG   | TGCTTGCTAAGGCGATTTT          |
| 34  | 201573 | GGGACGTGATAAATCCATTG   | TGTCGTGACTTTTTAACTCC   | GGGAAAGGTGAACGATACAGCCTTA    |
| 35  | 205327 | GAAATGTTGCTTTTTTCGTCC  | TGAAATGTCTGTTTGAACGG   | CTGTCTGTTTGAACGGTGGGAGG      |
| 36  | 220205 | TGCCCCATCTATTCTAGCAG   | GTGAACGTATTTCGGCATCTG  | AGAGCTAGCTCAGAAGCAAAATTAGC   |
| 37  | 225263 | AGAGACTGCATTGTCAGAAC   | GACGTTTTGACTTGTTCAC    | CACTTGTTCCACTAAATCCTGA       |
| 38  | 233903 | GCTGGTAAAATGTTGCGAAC   | GCAACTGCTCTTGGCTTTAC   | GGCCCATGCGTAAAATCGTG         |
| 39  | 242944 | ACATAGACTAACCTTGCTCC   | CGATTATGGAGCATCATGCC   | TATTATGGAGCATCATGCCAATATC    |
| 40  | 245533 | GTGGCGTTAGAACATGAAGC   | ATCTCTGTGGCTTCGCTTTC   | TTTCTGATAAGCCACGG            |
| 41  | 254542 | GAAGCCAATGAGCTCATTCG   | GGTTGCCCGTTTCATTCAAAC  | GGGCGGGATCTTGAAAAATC         |
| 42  | 261079 | GCTCGAGGACTTATCCAAA    | GCTATTTTCATAACCCACTC   | TTCGAGTCTAACAAGAATCCGTAA     |

| No. | Locus  | Amplification Primer 1 | Amplification Primer 2 | Single Base Extension Primer |
|-----|--------|------------------------|------------------------|------------------------------|
| 43  | 262601 | ATCATCGTAGTCACCTCATC   | GTATATTTAACTATCACGCC   | CCCTATCACGCCAAACGCATG        |
| 44  | 264283 | ATTAGCCGTGCTTTGAAGCC   | ACCTCGTTGCGATCAAATCC   | ATCGATCAAATCCATAACGAGCAAT    |
| 45  | 277587 | ATTGGCTGCAGAACTTCGTG   | CCTTATCCCCTTGTCTTGAG   | TTGAGTGAGTCAGGTCCTTACAGC     |
| 46  | 283656 | GTTGCAGCTCAAGAGAAACG   | GATTAAGAGGATAAGGGTTGG  | AATGACAAAAGAAAATTTTAATTATTG  |
| 47  | 284064 | CCTAGTCAAGGCATTTATCG   | AGAGAAATCTCATCGTCGCC   | CAATCTCATCGTCGCCACGATTAAC    |
| 48  | 284719 | GCGCGATATCACAAATACTC   | GATAGGACCATGCAAGCCAG   | GGGATGCAAGCCAGGAGATGATT      |
| 49  | 285188 | CTGTCATCTTTACCCCAACG   | GCCATGAATTACGAACACCG   | AACACCGGTTGCGATTA            |
| 50  | 285692 | TGAACGCTTTTATAGAACGG   | TGCTTGAGAATAGACAAGCC   | GAGACAAGCCAATCCCCTAAT        |
| 51  | 290120 | GGGTGTAGACGGAAGATTAG   | CTAGCCATCATTTTTCCACC   | TAGCAAAAACCGACTGATATTTCTT    |
| 52  | 291438 | GCGCTCAAACATGGAAC      | ACTTGCTTTTGGCTTCTCGC   | ATCTCGCCACAATTTTACTC         |
| 53  | 312102 | AGCTGGTCACAAATAATCG    | GATGACCAATACTAGAATGC   | GGAGGACGCTTAAAGTTGTTGA       |
| 54  | 317708 | TTGTTACAACAGCACCAAGC   | C'TTTGGCTATTGTGGTCTCC  | GCTCATATCAGCCATTACTTG        |
| 55  | 319262 | TGTCGTCATTGCTGCAGAAG   | TCACAGCTGGAATGGATTGC   | TGCCATAGCTTGCTTTTCATATA      |
| 56  | 326376 | TACAGGTAAACGACGAGTCC   | GACCC'TTATTTGGTCTCTAC  | GGAAAAGGATTTAGAATGTTTCAAAA   |
| 57  | 334609 | CCGAAAACGTTCTGATTTG    | GTTAAAACATTTAGGAGGG    | TTGAAACATTTAGGAGGGTATCAGGT   |
| 58  | 345575 | AGTGCATTCATCACAGCACG   | TGCCTTAAAAACCTTGGACG   | TAACCTTGGACGGTAAGC           |
| 59  | 364945 | CATCATGAGACGTCAGGTTT   | GGAAGAAGCAGGTGTTATCG   | AGGTGTTATCGGTCCAG            |
| 60  | 381581 | GTCTTCTATCTGCTATACTC   | TAGTCTAACAAAAACCCG     | CTATATAAATCATATAAAATGACGAG   |
| 61  | 393294 | AGACAATCCCTGCTTCAACG   | GTGAAGGTCATATACTGGCG   | CTGGCGCAAAAATAAAAAG          |
| 62  | 398051 | CTGACGATTGGGACAATCTC   | GGGACAATGATAGATAGTAG   | CTCTTAGGGCAATTGTAACACAAAAG   |
| 63  | 409052 | AGAGTCTCTCTAGGAACCTG   | TACTGGT'TTTGGCCTTGTCG  | GGCTTAAGCTTTGGAAATGGGGC      |
| 64  | 427769 | ACTATCTGTTCTCGTACCCG   | TGGACAGGTTGCATGTTTTT   | TTTTGCATGTTTTCAATCAGATAATG   |
| 65  | 433519 | ACCAGGTTGGAGATAAAGGC   | CACGATACAAGGAACGTCTG   | GCACGGAACGCTGAAAGATAAGAGC    |
| 66  | 439866 | TACCGTCTAAATCAAGCGCC   | ATTGGCCACTGTAATGACGG   | CAGCGCAGTACTAACGTATTTAAAAG   |
| 67  | 442045 | GGCCGTGCCATCAATTTTAG   | C'TTAGATGCGTCAACAGGTC  | CCCAGGTCAAAATGCGCTT          |
| 68  | 458239 | GGATCTGAAACAATGACCGC   | CACGAAGGGAACGAAAT'TGG  | AAGGGAACGAAAT'TGGTGC         |
| 69  | 468848 | CGAAAATGCTGAGATTTCGTG  | AACCTTGGCTAAGTAAGCCG   | GGGACCTTTTAAAAAGAGCGGAA      |
| 70  | 470370 | TCCCCATGGTAATGGGTTTG   | TGACCAAGTTGACAACAGAG   | CCCTTAGCCCCAAAAACACG         |
| 71  | 476851 | CCATTTTCTTTGAAGAGTACGG | CGGCC'TCTGTTTGGTATAG   | AGACTTCCC GCAAGGAACA         |
| 72  | 477854 | TCAAAGCTAGACTCAACCC    | CTAAGCTTGAACAAGGCCG    | CAAGGAATGTTGAATTCACCTG       |
| 73  | 484867 | GACACACTTGACGATCACAC   | CCAAGTGATCGTTGAACAGC   | GAACAGCTTTCACCAATTCAA        |
| 74  | 491836 | TCGCAAAATGTCCATGTCCC   | AGAATTTTGAAGCGCTAC     | CGGTAAACCAAAAGGAG            |
| 75  | 494333 | TGGGCATCATTTGAACGCTC   | ATTAGAGAACGCTTGGCAGG   | TGGCGTCTGGCAGGACTTTATCA      |
| 76  | 503347 | TTGAGCTGCCTAGATAGGTG   | GCCCAACTATTTTTCCCTCG   | CCCTCGCTTTGAAAAGT            |
| 77  | 504376 | GACAAGCTTTCCAATAAGCG   | TCATCAGCTTAACCTGACGG   | CCCTACAGGCCAAGTTAAGCAACC     |
| 78  | 509549 | CGACGATTTTGATCACGATG   | TTGCCTTTGCCATTGCTTG    | TTGCTTGGCAGAAAAGTCTGG        |
| 79  | 512693 | GTGTTGGCAAAATAATCTGG   | GATGGCTTATGGGTCAATGC   | TCCCATGGTGCCTTTTTTTC         |
| 80  | 520800 | CATGACGGTAAATCAGATGG   | GTGTGTCCATTACACACGAG   | CCATTTATTCCTAACAAAAAGCTTCT   |
| 81  | 547021 | TGTTCACTTGCTACCTCAAC   | C'TTGATGACTTAGGAGAAGC  | GCGGCTCTTATCGAGCAATATG       |
| 82  | 553152 | TGCTCGTGAGCCTGAAATTG   | CGCCTGTTATCGTTAACGTC   | TTTCAACGTCCTGTTCACAGC        |
| 83  | 570302 | CTTTGGCATCTCCATCACTG   | AGCTGCTGGTTTTTTTAGCCC  | TTGGTTTTTTTAGCCCAACATAAGGA   |
| 84  | 606726 | GCCTCCATGCCGTTATAACC   | GGCATCTATGACAAGGATCG   | GATCGTTCAAAAAGAAATCCTTC      |
| 85  | 612785 | ACCCCGTAGGTTAAGAAAGG   | AATGTGGCTCAGGCCAAATG   | GGGGTTTAGTATCCCATCAGT        |

| No. | Locus   | Amplification Primer 1 | Amplification Primer 2 | Single Base Extension Primer |
|-----|---------|------------------------|------------------------|------------------------------|
| 86  | 614402  | CCTTCAAAAATAGTGCCGTC   | GAAGCCATTTTGAATGGTAG   | GGATTAAAGCATGTTTAGAAGG       |
| 87  | 615671  | GAAGGCAAGGAGAACAAG     | CGGTAAAGTCAGCAC'TTCTC  | CCCACAAGAGCTTTATCTCTTTGAAAA  |
| 88  | 618026  | ACACCTGCTCTTTTCGATGTG  | AAGGAGTGTGAAGTGGATGC   | GTGGATGCCATTTTCAGA           |
| 89  | 626474  | TCAAGCAGCAGATGGAACCTC  | GCCCTACTGGTATATTTCTGC  | ATATTTCTGCAATTGCCG           |
| 90  | 629785  | CTATATGAGGAAGTTGGCTG   | CCAAAGTTAGTAGCAACCGC   | ACTATTGCGCTTTGCAC            |
| 91  | 650988  | GCTCATGTTCCCTGCAACAAG  | TCGGGATAGATTTGGTTCAC   | CGATAGATTTGGTTCAC'TTTTTCCAT  |
| 92  | 651247  | GTCACAACACCAATGAAGCC   | CCATCGTCATTGC'TAATGTC  | AAAAAAACTAATGATATCCCC'TATG   |
| 93  | 660832  | AGGATCTGGTAGTATTGCTC   | ATATCCCTAGTTT'GAGCCAC  | TTAGAGCAAGAATACGAGGG         |
| 94  | 692292  | GAAGGAGAAAAAATGTCAG    | TGTTTTCGCAGCGTACTCTTG  | GCTCTTGCGCATTTTCAATT         |
| 95  | 701833  | CGTCACAAAAGACAAC'TCTTC | TCCTGAATTTGATTTACGGC   | ATTTGATTTACGGCATAAAATTGA     |
| 96  | 705471  | AAGATTGCTATCTGTGGCGG   | GTAATATAAACGTCTGCGCC   | CGTCTGCGCCTTTTGCACAGCATCCT   |
| 97  | 710274  | CTTGGGAAGGTGATTATGAC   | CCATGAGTTGGTTGTTT'TGG  | CATTTGGCAGAGAAAAAAGGAC       |
| 98  | 714894  | GATTGACATGAAATGTGAGG   | GTTAAAACAAGGAGGGTAGC   | AGGGTAGCTATTTAAACTCTTGTT     |
| 99  | 723656  | TTACGCTCTTGCAGTTGGTG   | TTCGTTAGTAGCGCCATCAC   | ATTAGCGCCATCACCTGAGAAAAG     |
| 100 | 724702  | AGCATCGTTGGCATTACCAG   | TGCGCAACACTCACAATCTC   | CTCACATTCAGGAATCAAAG         |
| 101 | 727093  | CGTAGACGTCTGAAC'TTTCC  | TTGATTTTCGTTGACGCACCC  | GTTTCGTTGACGCACCCACGTCAGGA   |
| 102 | 790332  | CAAGCCTAAAAAGCCGCATC   | TGAACGATGCCAGTTTACAG   | AAAAGTTTGAACCCGAAACGTCACA    |
| 103 | 801548  | AGATCTACTTCACCTTGGGC   | TGACCGCGATAAATACGCTG   | GGACCAAAGACATGGGAAAAAC       |
| 104 | 823185  | GATAAACTGGCCATAAACG    | GCAGGTCATTTCTTATCGTG   | GGAAATAAAGAGGAGACTTTATGAAA   |
| 105 | 832888  | AGAGCGAGACACATTTGAGC   | TGTGTACCACGACAAATCCC   | TCCCTAAGATTGGTTTTTTTT        |
| 106 | 842041  | TTTGCCAAC'TACTGATAACG  | AACCCGAAGGAAGTAGGAAG   | GGCTTTACAAGGGTTATCTGATAAAC   |
| 107 | 850454  | ACTGTAGTAAGAAAGCAACC   | CTGATCACCTTCATAGACAG   | ACTTCATAGACAGTTT'TCC         |
| 108 | 853669  | CTGGATAGCCTTCTGCATAC   | GATTGCATCTGAAAACATGG   | GGGTTTCAAAGCTGTTCATG         |
| 109 | 860866  | TTATCCTCGCCGTTGGTTTC   | CAAGGAAAGCACCATTACGG   | TTACGGAAAAGATCAATCTTAC       |
| 110 | 872314  | CCCGTCCAAAATGTTTCTTG   | CGTTCAGGTTCC'TTGATTAC  | GTTGGGATAGAAGAAGGC           |
| 111 | 874111  | TCGGCAGTAAAAGCAACATC   | C'TTTGAGCCAAC'TGAGCTTG | GCTGAGCTTGGGGAAATT           |
| 112 | 881273  | TTCCAACAGGAATTTGTTCGC  | GAATCCTATTATCGAAGCCG   | TTGACCTATCAAGAAATCTCC        |
| 113 | 901307  | ACTTCCTCAGGATATTGGTC   | TATTACTCGCACCCAAGCTC   | TGCCCAAGCTCATCAAAGAA         |
| 114 | 903712  | CCGAGAATCGTATTAATGAG   | GCTCACCTACTTCTTCCATC   | CTCAGCTTTATCATCTGCCATTGAC    |
| 115 | 913036  | AGGGGAATATGGTTTGTGGC   | TTTGACGGATGACCGTATCG   | AGTTTGCTGATGGCAGTG           |
| 116 | 933863  | CACGAGATAGCACACCAATG   | CCATCATGTTGGCAAACCTC   | TCAATCTCATTTAACCACAGATCGT    |
| 117 | 940431  | GATTACCTATACCTCTTGCC   | CGTTTCTTCTTGAAGACGCC   | AAGGCCATCTAAAGCAGGAAG        |
| 118 | 941901  | AGTTTGCAGTGATGATTGCC   | CAGCTAGTAATTGATCTGCC   | ATCACATCATAAATAAGCCCAAAT     |
| 119 | 949710  | GGGTCGAGCGATTATAAGTC   | GGAAAAGCAGTTAGAGCAGG   | AGTTAGAGCAGGTGCAGG           |
| 120 | 967423  | CGTTAACTTGCTACTTTCTC   | TGTTTGACAAGACATTGTGG   | CATTGTGGATATTATATACTGTAAAC   |
| 121 | 975504  | GTTGATAAGAGGGAACCAGC   | CCAATAAGATGTTGCCCTCTG  | CTCATCTGACATTAGGTTTAACTTT    |
| 122 | 1019065 | TAGCCAAGCGTCATCTAGTG   | TAGCTCCGCTTGTATCTGTC   | CAGCCACTAACC'CAAATCGCTTG     |
| 123 | 1022760 | AGCTTCTAGCTGGTTAACTG   | ACAGTTTCGTCGTCCCAATC   | TCGTCCCAATCTTGTAAGG          |
| 124 | 1023643 | ACCAACAACAACCAAGGCAG   | TCGTAAGGATCCTGTTAGCG   | AAATATTGATGGAAACTATATCTTC    |
| 125 | 1026493 | TCTGCCTAGTCTTTGCTTAC   | GAAGCTTGGTATCTTCTGAC   | TCGATAAAGGTTACGAGCAC         |
| 126 | 1030601 | ACTTG'CATCCC'GTTACATC  | GGGTTGAGACGCAGCGTAA    | ACGCAGCGTAATCGTAA            |
| 127 | 1039955 | AGAGGCTTAACTAATGACAG   | AAACGACATCACCTTCGTAG   | TTTTCATCACCTTCGTAGAATTTG     |
| 128 | 1041721 | GGCTTTATTAACCGCAGGTG   | GTTTTGTGTATGCGGCTTTG   | TGCGGCTTTGACCAAAC            |



| No. | Locus   | Amplification Primer 1 | Amplification Primer 2  | Single Base Extension Primer  |
|-----|---------|------------------------|-------------------------|-------------------------------|
| 129 | 1044702 | GGTCCTGCAACTTTTCATCG   | TTGCACTGCATCTAAAGGTC    | ATTATGTTGGTAAGCATTTGGCAA      |
| 130 | 1054883 | GAGGACTTTGAGCACTGATG   | GTCAC'TCTTTAGTTCCACCC   | GCCCCAACTCTCTTTCC             |
| 131 | 1060414 | TGGTTCAC'TTTGAGCCCTTG  | CAGCTGTTATCATCAATGCG    | CCCCACCAC'TCATTTGATTTGAACCC   |
| 132 | 1063938 | TTCCAGATGACCTGCGAATG   | CTACCATCCATGCGTTGTTT    | GGTTTGGTTGGGAACAA             |
| 133 | 1076895 | AATACCCTCACCATGACCAC   | GCATGTGGATCTGGAATGTC    | TTTCCGATTTCAATATCAGATAA       |
| 134 | 1077899 | AGCTCCAAC'TCGTCAACAAC  | TCGTTTTTCA'TTCAACCCCTCC | GCAGTCAACCCCTCCTTTTTATTTAACT  |
| 135 | 1078726 | CTTTTTTGTGACCGACTTCC   | CGCGTGATAGTTCGGTTTTTTC  | GAGCACCTGCC'TTTTGTAGCAAT      |
| 136 | 1079364 | CCCTTCTGGAATATCAAGCG   | TGCTCAGCAAATGAAATCGC    | AGATGAAATCGCAAAAAGACAGTGT     |
| 137 | 1084815 | TCCATAACTGTGCGCAAAGC   | AAACCAATTGCAACCGGGAG    | GGAGTTGTTTTTAATGCATGATATTC    |
| 138 | 1087785 | GAACATTCTGTAAGCGCACG   | AAC'TTCAGTACTTCGTACGC   | GGGTGACTCTGCTAAGATGG          |
| 139 | 1091393 | CTCGTGATCTTGAAACAGAG   | TTTCCATCGATAGGATTAGC    | GATGATATAAGGGTAACCAGA         |
| 140 | 1092744 | CGCCTAAACCACTCACTAAC   | ACCAGTAGAACCACCAAAAG    | CCCTAACCGACCAAAAGTTCTAAC      |
| 141 | 1094245 | AAGTCGCTGTTGCCTTGACG   | GCCAGAAGCGCAAGCTAATA    | CAAGTTACATCTTTGGCTC           |
| 142 | 1101887 | ATGAGGGTGGCATATCAGAC   | GCTTTTTTGTGACCTTAAAC    | GAAC'TTCTTTTGATAAGAAGTTG      |
| 143 | 1108998 | TGTTCTTCTTGCC'TTTGGAC  | TGGGAGGTCTTCTGTGATTG    | AACCATTCCCTTGATCG             |
| 144 | 1113430 | GGGAGCATGCTTACTACTTG   | AGCGGCTTGGTAAAGTTCTG    | TCCAATTAATGATTTCAAAGAAAG      |
| 145 | 1114921 | CTTTGATATGTCTGAGGCCG   | CTTCTGCTCAGCAAAGAAGG    | AAGGGTAGGCTCAC'TAGAT          |
| 146 | 1115629 | GGCAGTTTAAGCCATCCAAG   | TGGTCTCCAGCTGCTAAAAC    | CCCCCAGCTGCTAAAACCCTAACGTGA   |
| 147 | 1119152 | TCAAACATTACCTCAAGCC    | GCCAACATCAC'TTGAAAAGAG  | GAGTTGATCAATACGTTCCG          |
| 148 | 1121783 | TATTGAGGGCTTGAAAGCCG   | CGCTGAATACCAAACAAGAC    | GTGATTTTGGTAGATGTGACT         |
| 149 | 1126295 | GGTTTGATTTACCTCTTGCG   | GCGTACTACTGATAGCAGTC    | ATAGCAGCTTTAACTGACTGG         |
| 150 | 1135396 | AGTTAACTTGCCGCTTGGTG   | AAAGAAAGTAAACGCAAGCC    | CCAAAAGCCATTTAAAATCACTAAAAT   |
| 151 | 1174118 | TACACCAATGTAGAGCTCTG   | AGCGGGTGCTAGTTTGAATG    | TTGGCTGCTGTTCAAGCTA           |
| 152 | 1179891 | GAAATAGCTTCTTCCAAAGGG  | GCGTGATGGACAATTAGATG    | CCCCCTATTGTGAACAAACTTGAAAAT   |
| 153 | 1181412 | ATCTGCTCTCCGTAGTACTC   | AAAAGGAAGCCATTGCTGAC    | GCTGACTTCTTATATTCCTTATG       |
| 154 | 1186289 | GACTAGCAGGATAAGCCTTG   | AGGGAATGGCTAAAGCAGAG    | TGACAAAACAGCCTTGAG            |
| 155 | 1199100 | CAACAAGCGTCACAAACAGC   | CCAAATATGCCACGAACACG    | CCACGAACACGTTCTGA             |
| 156 | 1203073 | TTGACGATTTGGTGCCAGAC   | TCTGCTTTGTTAGCAGCTCG    | GGTTAGCAGCTCGCTTCATAC         |
| 157 | 1205969 | GGTTTCTTTCGGTTTGGAACG  | TCTTCCATACC'TGAAACAGC   | GGCAGCAATCAAGTCACCT           |
| 158 | 1206168 | CCAGCGCCAGTTGATAATTC   | CCGATACGACCTACGAAATC    | GGGGACACTTGGAA'TGCAAAG        |
| 159 | 1215091 | TCAGCCAGAGCTTGAGTAAG   | GGGCAAGTGGCCTATTTGAT    | GTTGGGATTTTTTGATAATCCTA       |
| 160 | 1216179 | TGAGCCAAGTTGGTCATTCC   | CCTGACTATGATGACTGGAC    | GGACAACAGAAACTGAAAA           |
| 161 | 1224430 | AATCTCTGGCGATTTTGCTG   | GTCGTCCCAC'TTATTTGAGC   | CCTGTATCACTGTCTTTACCCA        |
| 162 | 1229090 | TCGGTGCTGGCGAAAAATTC   | AGCTGAAGAACC'TGCTTGTGTC | TCTTGATGAATTTGACTAGCAAAG      |
| 163 | 1273604 | ACTAACTGCTTGCTCAACCC   | TAAC'TGCCATGCTCATCTTG   | CCCAC'TGCCATGCTCATCTTGCTCCTGA |
| 164 | 1274506 | TAGTGGCGCAAACCATAGAC   | GAGGTGGGTTTTTACATGC     | AACCATTTATCTGATAGCGTATC       |
| 165 | 1282510 | AGCCAGTTGTAGCTGGTATC   | CCACTCCTTAAAAGCTTGCG    | ATCAAAGCTTGCCTGAATG           |
| 166 | 1292747 | GCTCTAATTGGTGACACTTC   | AGAAACAGTTGATGACTGGG    | TTATGAAAGCTACAATCAGG          |
| 167 | 1300624 | TACCAAGAACACAAGGAGGC   | AGATGTCAGAGGCGATTAGG    | AAATAGGGGATAAGAGGGATTTAGC     |
| 168 | 1309701 | GGGACTATTGTCTCAGACTC   | GAAATAGCTAAGCCTGACTG    | GACTGATGTTAAAGGTATGAA         |
| 169 | 1362922 | CTTTGGACGAAATCAATCAG   | TTAGTTGACCGCTCCAAACC    | TAAAATGCATAGGTGGGATAG         |
| 170 | 1365099 | ATTGGCTATAGGCAACCAGG   | TTCTGCTAAGGTCCGCATAG    | ATAAGGTCCGCATAGATAAACTT       |
| 171 | 1368463 | AGGGATTGGTTATCCGTTTC   | TTCCATATACGGAAGCGTTG    | TTTGCGCAACGAATCTAT            |

| No. | Locus   | Amplification Primer 1 | Amplification Primer 2 | Single Base Extension Primer |
|-----|---------|------------------------|------------------------|------------------------------|
| 172 | 1380032 | CACAGTAAAGGGTTAAAGGG   | GGCATTACTTCTGAGAAAAC   | AAAACAAC TGATAAAAATAAGAGGA   |
| 173 | 1398545 | ATAGATGGTCTCTGTTAAGGC  | GCGATTGCAGGAACAATTGG   | GAGTGGAACAGGTCTCTTTTTTAGGG   |
| 174 | 1408991 | CTGCATTGCAAACACTTGGG   | GGATGCTCAAGCTGACTTAG   | TGACTTAGATATGGCTACTAAGATTG   |
| 175 | 1459415 | AGGACATGACTTGGAAAAGC   | TGGTCTTATGCTTGGATACC   | CCCTGTTGTAGGACCAATTATTGGAG   |
| 176 | 1459955 | CTTGCCCAAACGAAAACCC    | CTGATAAAGACTGCCACAGC   | CCAACTGCAATTCCCCAG           |
| 177 | 1465235 | CCCAATGGATAAGCTGGTAG   | CACGAGCACGGATAAAGTTC   | CCCGTTCATCACATCCGCCT         |
| 178 | 1466966 | AGGCTGGCTAACTAGGAATG   | TTAGGTAGGGGTACGCAAGG   | GTGTACGCAAGGTGAAATTAT        |
| 179 | 1469148 | ACCTTTGTCAAACCGTTTTTC  | CGCTATCTCTCAGGAATGTC   | CAGGAATGTCAGCGATT            |
| 180 | 1471633 | CCAGTGTTAAACAATGCGTC   | GGCATTCTAATTGAAGGCATC  | TGGTTTTTCAATATCTGCT          |
| 181 | 1475088 | TATCAGTAGCAAAAACCGAC   | TGAGGCTCCTGATAACTAAC   | CCACCTTTAGTTGACAAACTAAGACT   |
| 182 | 1478114 | ATGGGTTGCTGGCTACTAAG   | CGACTAGTGGTTGTAGCATC   | GATCATAACCTGTTTTTTTCGTAA     |
| 183 | 1481314 | GGTAATTGTTGCAAGCGGTG   | AGTCTTTGCAGGCCTTTGTTC  | GCGCCTTTGTCAAAAATACAG        |
| 184 | 1484947 | TACCAACCAAACACCCCTG    | TGCTGATAGAGTCTCAGGTG   | GTCTCAGGTGCTTTTGTTCGGGT      |
| 185 | 1487337 | GGTGGTAGATAAGTGATCGG   | GGGATTA AACAGAGTGGGAG  | GGTGGGAGAATTGTGGGCT          |
| 186 | 1497764 | GCTGTTATCCATCAGTAGAC   | GACTGTGAATGAGGTCAAGG   | ATGTTATCTAAATCAAGTTGGG       |
| 187 | 1500872 | TAAGAAGCATACTGCGGTGG   | AGCAGCAGGAATTGCTGAAG   | TGCTGAAGGTGGACGTA            |
| 188 | 1501014 | CGTCGAACAGGTATTTTCTC   | AGCATCTGCAAAAAGCGCAC   | TTTTGAACTAAAGCCTATACATTTTT   |
| 189 | 1509415 | ACGGTAGGTGTTTTGTGCAG   | TTTGTACTGGAGACATGGGC   | GCTTCTCAGCTGCTAAAAAC         |
| 190 | 1509527 | GCAAGTCCTGACCCATTAAG   | GACGTGCTCAAATCCGTTAC   | TCCGTTACCGTGATGAA            |
| 191 | 1515192 | CCGCCATCAATAGCGATAAC   | AAGCTCAAGAAGTTGCTCAC   | TCACTTAGCAAGCTTCTTAG         |
| 192 | 1518653 | AGTCGCTATGGCTTTTTTGC   | TTACACACAGATGGTGCAG    | CCGAAACTAGTCTTTCATCTCC       |
| 193 | 1519059 | GACCTAGCTATTCAGGTTGC   | GGCATCAGGGCTGATAGTTG   | TCCCAGCTTTTAACCCAGACTGA      |
| 194 | 1525730 | GGCGCTACTAGAATCAATCG   | AAGGGAGTGGTTGGTTTGTG   | CCCCACACAAACTCATGAACCAGTAGG  |
| 195 | 1528442 | TCTCATAGGGTCAGCTGTTG   | GGACGGGAAAATAGCCATAC   | TGAATTCCCCAATCCCC            |
| 196 | 1536050 | AGGGCCTGTTTTGGATGAAG   | AAAAGCAGCAGGATTGCCAG   | CCGCAGAATTTTTTCACCACT        |
| 197 | 1536233 | GAGTCATTTTGAAGCGATCC   | AAGCTTAGGACAGCTAATCG   | ATTAGGACAGCTAATCGTTTTAA      |
| 198 | 1544580 | GCAGCAAAACTAAGCTGTTT   | CAACATTATCGCCAGATGC    | CATCTAACAGTTAGAGCGGGAAG      |
| 199 | 1563662 | ACCTGAAGCTTTCGCAGTTG   | CCTCCCATAATTTGAACACG   | AGAGGGAACAAGCCCAACA          |
| 200 | 1565479 | TCCCTTGCCATATCATCAG    | GAGCTATTCAACATGGCCAC   | AAGAAGCGGGTCATACCTAT         |
| 201 | 1566090 | CACTTCTGGTAGTCTAACG    | CTGAGATGAATAGTCCCAGA   | GATGAATAGTCCCAGATTTTTTAGT    |
| 202 | 1569141 | TTGTGCTGCAACGTTGATGG   | GTCTTCTCCTCCGCTTTTAC   | GAGTGAATCATGGTGGG            |
| 203 | 1570545 | TGGA AAAC TGGTCCAATCAC | TGGACTTATTGGTACACCG    | CCCCACC GTTTTTAACGTTTGC      |
| 204 | 1573272 | CGTTCTTTGACGGGATTATG   | TTGGGCTTATCTTCCCCAAC   | TGAACATCTGGA AATTGAAT        |
| 205 | 1579234 | AGCATTGGCTCCTTGG AATC  | ATATCCACCCCAAAC TCGC   | ACATGGTTGGGTAGTAATTGGAG      |
| 206 | 1580901 | TCAGCTTGAAGCAGCTACTC   | GCGTTCGTTGAATTTCAAGG   | GGGAGAAGCCTTTAAGTAGACAAT     |
| 207 | 1583782 | CTTCTTTGAGCGGACTACAG   | ACCATGGCACATACGATACC   | CTTGCGTCATGATCAGC            |
| 208 | 1588379 | TCTAATGACAGCACGTTAGC   | TGTAAGTCATTAGCCACAGG   | ACAGGATTACTTAAAAGAGGATGAC    |
| 209 | 1592955 | CTAGCAACATCTCTCGTCTC   | TTGAACGGTTTGGATGGTTG   | GGGTTTGGATGGTTGTTTGAAT       |
| 210 | 1597641 | GGTCAAGTGGTGACACACAA   | CCACAAGCAC TCTTCTATCC  | AAAGGTGTGACAACAATGG          |
| 211 | 1605096 | TTCTCTGACTCGATGCGAAC   | GAGATATGTTACAGGACTTG   | CCTTCTGTTCTCAACACTGGTTA      |
| 212 | 1613345 | GACGTAAGAGGCTGGAATAC   | ACGTGGCCAGAAATCCAAAC   | ACCAGAAATCCAAACAATTTT        |
| 213 | 1618236 | TAGTAGTCTGGTCTTTTGGC   | TCTAATCATAGAGCACAGGG   | GGGAGCACAGGGTTTATATCA        |
| 214 | 1620754 | TCGTATCGCTAATGGCACTC   | CAGGGATTGGACTTGATGAG   | TTGATGAGAAAATCACAGTATCA      |

| No. | Locus   | Amplification Primer 1 | Amplification Primer 2 | Single Base Extension Primer |
|-----|---------|------------------------|------------------------|------------------------------|
| 215 | 1627571 | AAGGCGGACATGAATACCAC   | TTCGTCAACAATCTGTTGCC   | AGTGGAACGTTTTGGTAG           |
| 216 | 1628980 | GGAGTCGCTTTAAAGTCTGC   | TGATTCAGGCGGTCAAGGTC   | TCCTATCTGC'TTTGAATGG         |
| 217 | 1630376 | GCTAGCACCACATACTTATC   | GTGAAAAATGAGTACGTAGAC  | AACTGGGAAATACCTTGTCAAA       |
| 218 | 1631973 | CTGGTATTGTTCTGGGTTTG   | TATAAGGCCACGAAAGGTCC   | ACGT'TAAAGGGGCAAACACGCCA     |
| 219 | 1634682 | GAATAATGCCAGTTTGCCTC   | TCCCTATTAGTTGGTTCCAC   | GTTCCACATTGGTTAGGTAT         |
| 220 | 1647120 | GTGCGTCTCCTTCTTCATAG   | CCTTATGCTATTGATAGCTC   | TTGTGTAGCATTCA'TTTGGCGG      |
| 221 | 1651729 | GACACGCGGAAAAACATATC   | GGGCCAATCTCCATCAAGTC   | CTTCTGATTATAT'TCTAGTACAAGGA  |
| 222 | 1652180 | TTCTCTTCCCACTCACCATC   | CTCAGAAAGATGTTCCAGC    | AGAGTCCCTGAAATCCGTT          |
| 223 | 1655280 | TGCCCTCTCTCTATAGATTG   | TGGAGATAGCAAAAGAACTC   | AAGAACTCATAACAGTCTACTC       |
| 224 | 1656383 | CCTAACCATCTTTGGGTAAC   | GCCTTTAATAA'TTTGGGATGG | TTGGGATGGTATCTGTTT           |
| 225 | 1661654 | GAAACAAATACCATGACAGG   | GCTTCTATCTACGGAGTTAC   | AATTATCGTTTTTCCAAATATCCCG    |
| 226 | 1667220 | CCGGCACAAAGAACGAGAAC   | GCCCTCAAAGAAAAAGTAGC   | TAAGAAACCAAAGAAATCACTGAT     |
| 227 | 1667466 | AGCACTTGGAAGTTTGTCCC   | ACTGCAAAC'TTGCCTTGGAC  | TCCAACACCAGCTCCATTA          |
| 228 | 1668714 | TGACCATGCATTAAGTGAC    | GCTCACAATGCTCAGACAAG   | AGAAGCAGCTGGAGATGA           |
| 229 | 1668828 | AATCGTAGCCTATGCTGGTG   | TCTGCTTTAGCATAATCCCC   | AGCATAATCCCC'TTCTTG          |
| 230 | 1669155 | GTCCACATAAGACACCGTTG   | TTGAGTGCTGGTGT'TTCTGC  | GTGTTTCTGCCAAAT'TGT          |
| 231 | 1669604 | GCTCCAGCTTCTTTAATACG   | GGATACGATGCAACAACAAC   | AGTCGCTTACCTGATTG            |
| 232 | 1669949 | ACTGGGCATGTTAACATGGC   | GCTTTTACGTTTGT'TTTCAG  | TCATTTTTTATACCTCTTTGACTTT    |
| 233 | 1678204 | TTGCCACTATCTCTGGCTTC   | TGTTGATACCTTGGCTGCTG   | TGAGGAGAAGGCTATCTAAC         |
| 234 | 1691812 | GCCACCTTTTGGAGAACTTG   | GAGTCCAATTGTCTCACGTC   | CGTCTCACGTCATTTTTGACTG       |
| 235 | 1694883 | CTGCGTGGCTGTTAAATCTG   | GGTGGTGT'TTCGTAAAGCTC  | AACGCTAGATGCTTTTTGG          |
| 236 | 1697897 | CACAGGCTGTGTGATTTTGG   | ACAACGCCAGTTT'TGACGTG  | AATGGGCTTTATGAACGCCAATTATG   |
| 237 | 1699412 | GGACCAGATAGAAATGCCAC   | ACCGAATGCACCTTTACCTC   | GATGAAAAGGCAC'TTGAA          |
| 238 | 1700339 | TGGTTTCCATGTGACAGGAG   | TCCCC'TTCTTTGACTTTCAG  | TCCCGAATATCTACATATTCAGCCTG   |
| 239 | 1703042 | GCAACAACGCGACAAAAC'TC  | CCAAATTCATGGACAATCAC   | TAAAGGTTAT'TATCC'TAACATAGAT  |
| 240 | 1709912 | TCTAAGGACACACATGCTGG   | TCGGCCACAT'TGATGTCTTG  | GGCAACCAAGTCTCTTGGG          |
| 241 | 1716403 | TTCACGGCGCTCTTTTTCAG   | AAGAATCGCTCTATGCAGCC   | CCGTTGGGTTTGGTGACAT          |
| 242 | 1739068 | GATCCACGAGATGTTTGGC    | TGAACTGCCATCTGCTCTTG   | TTGGGATGCTAAAGGAG            |
| 243 | 1742009 | GGCTATGGTCGTGAGTTTAG   | AACTGACATGCC'TTGCCTAG  | CTGACTTATCACACCCTG           |
| 244 | 1745943 | CAAATAACCCCTGTTTGCTC   | ACGATTCTCTCCTAGCTGTC   | TGTGCGTAGAGAAATAAGGATAAC     |
| 245 | 1746410 | TGGTGCTTGACCTTTACCTG   | GCTGGAAAAGCATCAGACTC   | AATCAGACTCACAAATCCCTGATA     |
| 246 | 1747737 | TTGTCTCAGGTCAAGTCTGC   | TGAGAACTTGT'TAGATCAGG  | TTTGGTTAGATCAGGTTACACAATTA   |
| 247 | 1747738 | TTGTCTCAGGTCAAGTCTGC   | TGAGAACTTGT'TAGATCAGG  | GTTAGATCAGGTTACACAATT        |
| 248 | 1749870 | TAAATGCGTGATCGTACTG    | TTCGTTAAGTCAGTACGACC   | TCCATAAAAATGC'TTTCAAAT       |
| 249 | 1750069 | ATGGTTGTACCATAACAGTC   | GCCATTTATGCTCTTTTTTG   | TAACCTAATTTGTATTTTGTACAC     |
| 250 | 1755630 | AGACAGTTGATTGGTGGCAG   | TTAGCATTTGACTTGTCTGG   | TCATTTGACTTGTCTGGAATTTAG     |
| 251 | 1760061 | GGCAGACTTTGCAGCTATTG   | CGCCTGAGTCAAACGTATAG   | GGTTTTTATCGGCTGCAATG         |
| 252 | 1761030 | CAAACACTTGCTTAGGTCGG   | CCTCACCAC'TCGTTAAGAC   | ATACGACCGTGT'TTCTAAAATA      |
| 253 | 1761173 | GCTTCTATCATACTCCTGAC   | AGAGCGCACACCATTTTAGG   | TCCCACCATTTTAGGCTATTCTT      |
| 254 | 1763553 | TGCCTAGTGAGATAATCACC   | TAGGAAGGCTTGACATATGG   | GAGATGGAAAT'TGGTGAAACC       |
| 255 | 1764204 | AAAGCTTCTGAGATTTTGGC   | ATGAGGCCAATAATGCCATC   | CACACAACACCGTTTCAT           |
| 256 | 1771377 | ATAACTCACCTGCTGCCATC   | TGGGCAATCTGTGGTCAATG   | TCTGTGGTCAATGGAAT'TGTCAC'T   |
| 257 | 1780162 | ACACGGCAATGATCCAACAG   | GATGAACCACATAGCAGGTC   | CTAGGTCTGTCCCCTGTAA          |

| No. | Locus   | Amplification Primer 1 | Amplification Primer 2 | Single Base Extension Primer |
|-----|---------|------------------------|------------------------|------------------------------|
| 258 | 1790135 | GATATTTCCCTCACGCTCTG   | CAGTGAGCAAGTTTTTCACGG  | CTGACTCGATACAATTGCTTTTTGA    |
| 259 | 1796147 | CATAGTTGGTGACACCCATC   | ACAAATGGCCTTTTGGTGGG   | TTTGGTGGGTGAATACGACAACAT     |
| 260 | 1798264 | GCATGCCATTGGTTGCTTTC   | TTTGTAGCCACCACCTGAAC   | AAATTTTATGAGCAATGTCGATA      |
| 261 | 1801826 | GCAAAGTTTAGCTTGAGCGG   | TAAATGGCCCTAGGTAAGAG   | ACAAGAGCCGATAACGGCATTGAT     |
| 262 | 1806778 | ACCGTGATTTCCAGCAGTTG   | TCTTGATACCTCCCTGTTTCG  | ACCCTGTTCGAATATCATAACG       |
| 263 | 1812955 | GGAGTAAGTCCAATTCTCCC   | CCTGCCAATTCATATTTTCGC  | CTGAAAAAGATTTTAAGGACTGAT     |
| 264 | 1815075 | GGAAGTGAAGATCAGTTCCCTG | TTCCAGTCGTGTCCCTTATAG  | CTTTTTTATCAATTGTCATGAGTTTT   |
| 265 | 1815253 | CAGGTTAAGGCTGGACAAAC   | ATTAGTCACCACAAGAGGCG   | GGAGGCGTTTCAGTGGCGT          |
| 266 | 1817279 | ATAATGGCTTTTTTGGCAC    | GATAAAATCTGACTGACACC   | CCTCGATTGCAAATTTGTCTG        |
| 267 | 1818197 | GCGCTCATCTCACGAATATG   | GTGTGCACTTACTTGACCTG   | CTTGACCTGAGCTTCTG            |
| 268 | 1825921 | ACAAGACTATCGCCCCCTATC  | CCATACTGATAGCCAACAGG   | TGATAGCCAACAGGAATAGCAGT      |
| 269 | 1834388 | GATTGCATCTGGTGTCTATG   | TAATAGCTAACTCTGCTCGG   | AGAGCTAACTCTGCTCGGTAAGTTTT   |
| 270 | 1841704 | AGCTCGAAGATTGCTTGACG   | TGCCATGCCATCAGAAAAAG   | TTAGATGCTCTTAGTAAAGTTTATAG   |
| 271 | 1842608 | TCCAAGCCAAGTTCGATAGG   | AGCGTTCCTTGGCTCTAACC   | TCTGTGGCTCTAACCATCTATG       |
| 272 | 1860162 | GGACAAGTTCAGTACCGAAG   | GACACCAAAAAAGCATGGG    | CTAAGTAGATACTTTGGTATTCCT     |
| 273 | 1868362 | AACAATCAAGCACTAGCTCG   | GAGATGGCTAATAGGACTGG   | GGAATAGGACTGGAATTTAGAATC     |
| 274 | 1871539 | GGGAACAGCCTTTCTGATAC   | TAAGCATCCTGCACTTCCCTG  | GCATCCTGCACTTCCCTGCAGTGGGTG  |
| 275 | 1880453 | CTCTATGTCTAGTTGACATT   | GGCACAATTACACCTCTTTC   | GGGACTTGAAAGTAAGGGCCT        |
| 276 | 1881838 | AGTGACTTCGTTTTGAAGTG   | ATAGCAGTTGCTGGATCAGG   | GGAGGATATGTTGGATTATCACTA     |
| 277 | 1881840 | AGTGACTTCGTTTTGAAGTG   | ATAGCAGTTGCTGGATCAGG   | GATATGTTGGATTATCACTAGG       |
| 278 | 1881986 | TGGCTTATCACCAATTCAAG   | GCAATAATGACCAGTTCCGC   | CCTTATAAGCTGCTTTGCTATCT      |
| 279 | 1891225 | GCGTAGTGATACATCAGAAAC  | GCCTATGTAGTGATTAGCCC   | GCTTAGATAAAATAAAATGAGGTGA    |
| 280 | 1896371 | CAGAGGTTAAGCTGTTTGGG   | CATCAATGAGCGCCTAAGAC   | CCATCGCCTAAGACGACTTCTTC      |

1. All amplification primers were modified at the 5 prime end with the following 10 mer sequence: ACG TTG GAT G.
